# Supplementary material for: iSNO-AAPair: incorporating amino acid pairwise coupling into PseAAC for predicting cysteine S-nitrosylation sites in proteins
Source: PubMed Central journal article supplement (PMC3792191; doi:10.7717/peerj.171), 2013-10-03
Supplement: peerj-01-171-s001.pdf [file peerj-01-171-s001.pdf]

**Online Supporting Information S1.** The learning dataset  $\mathcal{S}_L$  consists of a positive dataset  $\mathcal{S}_L^+$  and a negative dataset  $\mathcal{S}_L^-$ . They each contain 2300 SNO and 2300 non-SNO sites and peptide fragments derived from the 1,530 proteins. See the text of the paper for further explanation.

Positive dataset  $\mathcal{S}_L^+$  contains 2300 SNO sites and peptide fragments

| Uniprot ID | Site  | Sequence                        |
|------------|-------|---------------------------------|
| Q8R164     | 234   | ICRHELLPLVQ <b>C</b> PTLIVHGEKD |
| P61979     | 132   | QLPLESDAVE <b>C</b> LNYQHYPKSD  |
| P02730     | 201   | QHSSLETQLF <b>C</b> EQDGGTEGH   |
| Q9EQ80     | 147   | NSWLAKGLGT <b>C</b> TTRPIHPSRA  |
| Q96EK6     | 157   | KLNCYKITLE <b>C</b> LPQNVGFYKK  |
| Q9JK42     | 392   | YQTIQEAGDW <b>C</b> VPSTEPKNTS  |
| O70325     | 55    | SAKDIDGHMV <b>C</b> LDKYRGFVCI  |
| P27695     | 310   | IRSKALGSDH <b>C</b> PITLYLALXX  |
| P09382     | 43    | LNLGKDSNNL <b>C</b> LHFNPRFNAH  |
| Q8CHP8     | 193   | KAVRYLQQPD <b>C</b> LLVGTNMDNR  |
| P54822     | 266   | ASLGASVHKI <b>C</b> TDIRLLANLK  |
| Q9BY44     | 119   | LQLYDVKTGT <b>C</b> LKSFIQKMQ   |
| Q29RF7     | 1079  | SKTNEKLYTV <b>C</b> DVALCVINSK  |
| Q8BMF4     | 581   | FSAIINPPQ <b>A</b> CILAIGASEDK  |
| Q60936     | 265   | ANAERIVSTL <b>C</b> KVRGAALKLG  |
| P62245     | 72    | VVNLTGRLNK <b>C</b> GVISPRFDVQ  |
| Q8BIJ6     | 1005  | SETADALCPR <b>C</b> AEVIGAKXXX  |
| Q8R5G7     | 831   | GLLRGDHLFL <b>C</b> PAPGPGPPAP  |
| P17182     | 357   | IGSVTESLQ <b>A</b> CKLAQSNWGV   |
| P78347     | 475   | KLRKMVDQLF <b>C</b> KKFAEALGST  |
| Q9D6J5     | 130   | SPTPVSWDVM <b>C</b> KHLFGFVAFM  |
| P62281     | 116   | HKNMSVHLS <b>P</b> CFRDVQIGDIV  |
| Q80UU9     | 75    | LWVRWGRRGL <b>C</b> SGPGAGEESP  |
| Q99LB2     | 210   | ELAPKNIRVN <b>C</b> LAPGLIKTRF  |
| Q9CZB0     | 107   | ESYLMFVKSL <b>C</b> LGPTLIYSAK  |
| P10605     | 211   | EGDTPRCNK <b>S</b> CEAGYSPSYKE  |
| P17405     | 120   | ARVGSVAIKL <b>C</b> NLLKIAPPAV  |
| Q9D1H8     | 49    | SEKVRATNLN <b>C</b> SVIADVHRDG  |
| Q8R404     | 60    | PAMYQFSQYV <b>C</b> QQTGLEMPQL  |
| Q9CQ75     | 24    | LGLREIRVHL <b>C</b> QRSPGSQGVR  |
| Q9D7J4     | 28    | LGILDVENTP <b>C</b> ARESILYGSL  |
| A2ASS6     | 34176 | TLRMRSRVP <b>C</b> GQNTFILNV    |
| Q99LC3     | 183   | MYNQYIRKQ <b>C</b> VVDHYNEIKRL  |
| P38647     | 66    | VGIDLGTTNS <b>C</b> VAVMEGKQAK  |
| Q924X2     | 448   | LYGKALLHGN <b>C</b> YNRWFDKSFT  |
| Q15149     | 1136  | LKDIRLQLEA <b>C</b> ETRTVHRLRL  |
| P18760     | 80    | TFVKMLPKD <b>C</b> RYALYDATYE   |
| Q9D1E6     | 83    | LLGSYPVDDG <b>C</b> RIHVIDHSGV  |
| Q7TPV4     | 1028  | PSRPRHQAQ <b>A</b> CLMLQKTL SAR |
| P97311     | 301   | DLSYRLVFLA <b>C</b> HVAPTNPFRG  |
| Q8VCT3     | 151   | TYRVGEGPGV <b>C</b> WLAPEQTAGK  |
| Q9R112     | 127   | RVAELNPDEN <b>C</b> IRTDSGKEIS  |

---

|        |      |                                 |
|--------|------|---------------------------------|
| Q8VDN2 | 459  | GDASESALLK <b>C</b> IEVCCGSVME  |
| O55126 | 88   | PECLDAYNKI <b>C</b> QEVLPKIHEG  |
| Q9QVP4 | 43   | QIQEFKEAFS <b>C</b> IDQNRDGIIC  |
| P07310 | 283  | WNEHLGYVLT <b>C</b> PSNLGTGLRG  |
| P36536 | 178  | LNARPMEVFM <b>C</b> SVLKROGYGE  |
| Q9H0C8 | 190  | VISVEKTVKR <b>C</b> LLDTFKHTDE  |
| Q9UDY4 | 175  | RVSLEEIYSG <b>C</b> TKRMKISRKR  |
| P62717 | 109  | DLTTAGAVTQ <b>C</b> YRDMGARHRA  |
| Q924X2 | 608  | REGRTETVRS <b>C</b> TNESAAFVQA  |
| Q9D1P4 | 59   | DFSDFLSIVG <b>C</b> TKGRHNSEKP  |
| Q9R1P0 | 74   | KIYKLNEDMA <b>C</b> SVAGITSDAN  |
| Q60864 | 461  | YQKALDLDSS <b>C</b> KEAADGYQRC  |
| P62192 | 58   | KLPLVTPHTQ <b>C</b> RLLKLLKLERI |
| Q92600 | 99   | RVCNALALLQ <b>C</b> VASHPETRSA  |
| P13639 | 67   | TDTRKDEQER <b>C</b> ITIKSTAI SL |
| P63028 | 28   | YKIREIADGL <b>C</b> LEVEGKMVSR  |
| P21333 | 717  | LRVQVQDNEG <b>C</b> PVEALVKDNG  |
| P07237 | 312  | LEFFGLKKEE <b>C</b> PAVRLITLEE  |
| Q3U5Q7 | 44   | PRRFTVELPD <b>C</b> SLTHFVLGDA  |
| P63000 | 178  | VFDEAIRAVL <b>C</b> PPPVKKRKRK  |
| Q64105 | 235  | KLKSDGALVD <b>C</b> GTSAQKLLGL  |
| Q8R5K2 | 247  | SQQDAQEFLR <b>C</b> LMDLLHEELK  |
| Q8R0Y8 | 235  | YPPERMFVGA <b>C</b> AGLIGQSASY  |
| P84091 | 251  | IAIDDCTFHQ <b>C</b> VRLSKFDSER  |
| P58252 | 466  | RYVEPIEDVP <b>C</b> GNIVGLVGVD  |
| Q8BGK2 | 106  | HRPDPSTIEG <b>C</b> SQKPDNYLL   |
| P30046 | 24   | RVPAGLEKRL <b>C</b> AAAASILGKP  |
| Q02566 | 949  | TAKKRKLEDE <b>C</b> SELKIDIDL   |
| Q9DCD0 | 402  | DDFFKSAVDN <b>C</b> QDSWRRVIST  |
| Q99683 | 869  | GKAADIWSLG <b>C</b> TIIEMATGKP  |
| P52825 | 489  | YGQTVATYES <b>C</b> STA AFKHGRT |
| Q69Z37 | 1281 | RCFKKYVELF <b>C</b> HLDTNLVQ GK |
| Q91VD9 | 710  | ISRASQTMAK <b>C</b> VKAVTEGAQA  |
| P17427 | 330  | DSEPNLLVRAC <b>N</b> QLGQFLQHR  |
| Q86SE5 | 51   | IFSKYGKIVG <b>C</b> SVHKG YAFVQ |
| P27635 | 195  | VAEKRLIPDG <b>C</b> GVKYIPNRGP  |
| Q99NB1 | 491  | LEGGDVSGAL <b>C</b> ISQAWPGMAR  |
| O08663 | 135  | PNGVFPKGQE <b>C</b> EYPPTQDGRT  |
| P13639 | 369  | PSPVTAQKYR <b>C</b> ELLYEGPPDD  |
| Q9Z0N1 | 348  | GVGTKIDPTL <b>C</b> RADRMVGOVL  |
| Q9JIK5 | 754  | MVFLKGKLG <b>V</b> CFDVRTEAVTE  |
| Q9WUB3 | 496  | GITPRRWLVL <b>C</b> NPGLAEVIAE  |
| P07900 | 420  | KVIRKNLVKK <b>C</b> LELFTELAED  |
| P68366 | 295  | QLSVAEITNA <b>C</b> FE PANQMVKC |
| Q8BMF4 | 163  | TRDVPVGSII <b>C</b> ITVEKPDIE   |
| Q9ESD7 | 344  | GARGYLKASL <b>C</b> VLGPGDEAPL  |
| Q6PEB6 | 119  | LCAAHKTPKE <b>C</b> PAIDYTRHTL  |
| P22315 | 193  | IAFTQYPQYS <b>C</b> STTGSSLNAI  |
| Q5JTH9 | 317  | MLTLLKDLLP <b>C</b> FPEGLVKSCS  |
| Q61553 | 121  | YFGGTEDRLS <b>C</b> FAQSVSPA EK |
| P00403 | 200  | GVYYGQCSEI <b>C</b> GANHSFMPIV  |
| Q9D8B4 | 18   | SYHEVPDGTQ <b>C</b> HRKTYIT TAL |

---

---

|        |      |                        |
|--------|------|------------------------|
| Q60854 | 372  | HHVKTNGILFCGRFSSPXXXX  |
| Q9Y3I1 | 286  | RLQLLPESFICKKLGENVAN   |
| Q99615 | 175  | MDRALEFAPACHRFKILKAEC  |
| Q13155 | 143  | LSLLVLHRLLEHFRVLSTVH   |
| P14824 | 358  | VSRVELKGTVCAANDFNPDAD  |
| P35557 | 371  | TTDCDIVRRACESVSTRAAHM  |
| P07742 | 254  | SAGGIGVAVSCIRATGSYIAG  |
| Q9UHG3 | 258  | WAVEGGNKLVCSGLLQASKSN  |
| Q8BWF0 | 81   | SGAKLGTVADCGVPEARAAVR  |
| P49442 | 277  | DTIKAALSRVCGGSVFPAAGA  |
| Q78PY7 | 96   | LRKKLIGKEVCF TIENKTPQG |
| P32921 | 66   | AAMGEEYKAGCPPGNPTAGRN  |
| O70468 | 471  | VMVGQRVFEFCEVSEEGAQVK  |
| Q9CQ65 | 55   | LILGKIKNVDCVLLARHGRQH  |
| Q8K1I3 | 109  | QRGYSVPATAACRSTVQMSKGQ |
| O35286 | 226  | EVGYSIRFEDCSSAKTILKYM  |
| Q91V41 | 40   | QFTEKKFMADCPHTIGVEFGT  |
| O88712 | 54   | ILKDVATVAFCDAQSTQEIHE  |
| P63104 | 94   | EKIETELRDIENDVLSLLEKF  |
| P50991 | 379  | GSGKLLKITGCASPGKTVTIV  |
| Q4VXU2 | 339  | GGHSGFGFVCFSSPEEATKA   |
| Q99LC5 | 109  | TQKQFSYTHICAGASAFGKNL  |
| Q99KP6 | 114  | SHALYQHDAACRVIARLTKEV  |
| P63244 | 182  | KLVKVNLANCKLKTNHIGHT   |
| Q62465 | 99   | PGQLTLRVACGLNFADLMGR   |
| P21817 | 905  | VRDDNKRLHPCLVDFHSLPEP  |
| Q99J39 | 271  | SNNIQGIVKECPPTETEERNR  |
| P62701 | 181  | DFIKFDTGNLCMVTGGANLGR  |
| P13010 | 493  | PNPRFQRLFQCLLHRALHPRE  |
| P27659 | 253  | KTHRGLRKVACIGAWHPARVA  |
| Q9R1V6 | 23   | CVLGTCPLARCGRAGVASLKG  |
| O08528 | 438  | HKA VRRLVPDCDVRFLRSEDG |
| P56380 | 6    | XXXXMALRACGLIIFRRHLI   |
| P50544 | 423  | QIEAAISKIFCSEAANKVADE  |
| Q1XH17 | 242  | KPQTEFLMKFCLVTSRLQKIL  |
| Q92945 | 176  | QINKIQODSGCKVQISPDSGG  |
| Q8R035 | 82   | IPLDRLSISYCRSSGPGGQNV  |
| Q9P2E9 | 1323 | AEFEEAQTSAACRLQEELEKLR |
| P18031 | 92   | ILTQGPLPNTCGHFWEMVWEQ  |
| Q9DBF1 | 522  | AWKQYMRRSTCTINYSTSLPL  |
| Q8BP47 | 277  | FRDHFFDRGYCEVTTPTLVQT  |
| P63167 | 24   | SEEMQODSVECATQALEKYNI  |
| Q8BFR5 | 127  | TAARHYAHTDCPGHADYVKNM  |
| Q02566 | 907  | QDNLNDAEERC DQLIKNKIQL |
| P61161 | 221  | ETVRMIKEKLCYVGYNIEQEQ  |
| P50914 | 42   | DQNRALVDGPC TQVRRQAMPF |
| Q9ESW4 | 407  | KLLPRKLRFFCDPRKREQMLP  |
| P23198 | 177  | FYEERL TWHSCPEDIAQXXXX |
| P20073 | 298  | TNQEIREIVRCYQSEFGRDLE  |
| P00966 | 132  | GNDQVRFELSCYSLAPQIKVI  |
| Q9CXI0 | 244  | RVLKPGGRFLCLEFGQVNDPL  |
| P53996 | 159  | INCSKTSEVNCYRCGESGHLA  |

---

---

|         |       |                                                                      |
|---------|-------|----------------------------------------------------------------------|
| P47955  | 61    | LANVNIGSLI <span style="color:red">C</span> NVGAGGPAPA               |
| Q9CXJ4  | 305   | GSGLRKLRSRQ <span style="color:red">C</span> QEQIARATGV              |
| Q921G7  | 560   | SIYDGPEQRF <span style="color:red">C</span> PAGVYEFVPL               |
| Q9D1I5  | 168   | KPVI <sup>1</sup> FLHPKD <span style="color:red">C</span> GGVLVELEQA |
| P10599  | 69    | VDDCQDVASE <span style="color:red">C</span> EVKCMPTFQF               |
| Q9Z1Q9  | 1184  | GCAVAVASDR <span style="color:red">C</span> SIHLQLQGLV               |
| P31949  | 13    | KISSPTETER <span style="color:red">C</span> IESLIAVFQK               |
| Q3ULD5  | 131   | TGIGRVSGVE <span style="color:red">C</span> MIVANDATVK               |
| Q62234  | 778   | NNPVKGSRFT <span style="color:red">C</span> HGLTTAQSYI               |
| P48039  | 130   | GIAINRYCYI <span style="color:red">C</span> HSLKYDKLYS               |
| P21981  | 669   | GLHKLVVNFQ <span style="color:red">C</span> DKLKS VKGYR              |
| P47857  | 170   | GLVGSIDNDF <span style="color:red">C</span> GTDMTIGTDS               |
| Q9JI75  | 223   | KSIWKEEPIH <span style="color:red">C</span> TPPWYFQEXX               |
| Q8NHW5  | 27    | IIQLDDYPK <span style="color:red">C</span> FIVGADNVGS                |
| O43175  | 369   | QGTSLKNAGN <span style="color:red">C</span> LSPAVIVGLL               |
| P05109  | 42    | DDLK <sup>1</sup> LLETE <span style="color:red">C</span> PQYIRKKGAD  |
| Q9DB05  | 42    | FGGSSKIEE <span style="color:red">C</span> EIYARAANMF                |
| O08807  | 151   | FKSINTEVVA <span style="color:red">C</span> SVDSQFTHLA               |
| Q76MZ3  | 329   | ENVIMTQILP <span style="color:red">C</span> IKELVSDANQ               |
| Q99LC5  | 60    | EVSCLVAGTK <span style="color:red">C</span> DKVVQDLCKV               |
| P10415  | 229   | TLLSLALVG <span style="color:red">C</span> ITLGAYLGHK                |
| Q80ZW2  | 146   | RFVSLRDGFV <span style="color:red">C</span> ALLRFRQHVL               |
| P15121  | 304   | RNWRVCALLS <span style="color:red">C</span> TSHKDYPFHE               |
| Q6NXE6  | 484   | VAKAALRDLG <span style="color:red">C</span> HVELRELWTG               |
| Q8K4Q0  | 362   | LAERIMRSYN <span style="color:red">C</span> TPVSSPRLPP               |
| A2ASS6  | 23794 | RKAYSTVATN <span style="color:red">C</span> HKTSWKVDQL               |
| Q9Z2W0  | 445   | LAMHSIRETA <span style="color:red">C</span> TTGVLQTLTL               |
| P21980  | 620   | QNPLPVALEG <span style="color:red">C</span> TFTVEGAGLT               |
| O35459  | 101   | CFQKISKDSD <span style="color:red">C</span> RAVVVSGAGK               |
| Q3UK37  | 398   | KKALHQLQRQ <span style="color:red">C</span> QELARLAGA                |
| Q8BH61  | 153   | VRLSVQSSPE <span style="color:red">C</span> IVGKFRMYVA               |
| Q8BMS1  | 550   | KDGPGFYTTR <span style="color:red">C</span> LAPMMSEVMR               |
| Q6Z WV3 | 80    | ICANKYMVKS <span style="color:red">C</span> GKDGFIHVR                |
| O70468  | 619   | DYSFVPEGFA <span style="color:red">C</span> NLSAKLHFME               |
| P23610  | 110   | QERDARQRLV <span style="color:red">C</span> PAAYGEPLQA               |
| P51859  | 12    | SRSNRQKEYK <span style="color:red">C</span> GDLVFAKMG                |
| P05213  | 316   | DPRHGKYM <span style="color:red">C</span> LLYRGDVVPK                 |
| Q921S7  | 207   | SLARRTSAQN <span style="color:red">C</span> TLATTWNRES               |
| O00233  | 216   | TRWAGKLLG <span style="color:red">C</span> NIIPLQXXX                 |
| P29474  | 184   | AKQAWRNAPR <span style="color:red">C</span> VGRIQWGKLO               |
| Q64737  | 134   | WRAF <sup>1</sup> TNPED <span style="color:red">C</span> SFITSANFPA  |
| P35579  | 917   | TAKKQELEE <span style="color:red">C</span> IHDLEARVEEEE              |
| Q9W TX5 | 160   | EAQVRKENQW <span style="color:red">C</span> EEKXXXXXXXX              |
| P63330  | 251   | HQLVMEGYNW <span style="color:red">C</span> HDRNVVTIFS               |
| P48200  | 178   | CRGQTTCRGS <span style="color:red">C</span> DSGELGRNSG               |
| Q3U0B3  | 195   | LEAQ <sup>1</sup> THIRAT <span style="color:red">C</span> ISPGLVETQF |
| Q14690  | 89    | SLCEGMRI <span style="color:red">C</span> LGCVKEVNELELV              |
| O08600  | 193   | LTRTYQNVYV <span style="color:red">C</span> TGPLFLPRTE               |
| Q9CQJ8  | 42    | IHRDKYRYFA <span style="color:red">C</span> LMRARFEEHK               |
| Q8BXV2  | 218   | GYWRGSPGGL <span style="color:red">C</span> SPSVEEKLEH               |
| P53996  | 88    | CGRGGHIAKD <span style="color:red">C</span> KEPKREREQC               |
| Q8CGC7  | 744   | ERPAPAVSST <span style="color:red">C</span> CATAEDSSVLY              |

---

---

|        |      |                         |
|--------|------|-------------------------|
| Q80XN0 | 86   | HSKGFLVFAGCLMKDKGDAGV   |
| Q64737 | 237  | GPNTGGMGAYCPAPQVSKDLL   |
| P00558 | 99   | LGKDVLFLLKDCVGPVEVEKACA |
| P06213 | 1261 | DGGYLDQPDNCPERVTDLMRM   |
| P23396 | 97   | YAEKVATRGLCAIAQAESLRY   |
| Q9BQ04 | 31   | LFEQYGVLECDIIKKNYGFVH   |
| P21980 | 143  | GHFILLFNAWCPADAVYLDSE   |
| Q99439 | 164  | FDDATMKAGQCVIGLQMGTNK   |
| Q60597 | 283  | SSEKRFGLLEGCEVLIPALKTI  |
| Q8R2Y8 | 88   | KMGKGVAAQCSHAAVSAYKQ    |
| Q3ULJ0 | 104  | VIPHQFIHKICDEITGRVPEK   |
| Q61733 | 345  | PIRLFMELVTCGLSKNPYLSV   |
| Q3U1J4 | 128  | TGIIGIIDPECRMIGLRLYDG   |
| Q9D7B6 | 157  | LCTMEKFASYCLTEPGSGSDA   |
| Q921H8 | 123  | TVPLSTVNRQCSSGLQAVANI   |
| Q96EK6 | 113  | LIIEHKFIHSCAKRGRVEDVV   |
| P80318 | 398  | ERNLQDAMQVCRNVLLDPQLV   |
| Q9NYY8 | 377  | SKVVDNIHGCPLRIMINILQ    |
| Q99MR3 | 771  | WHSARLRIFLCLGPREAPGAA   |
| Q99NB1 | 271  | EQEMAKEAPVCTPESMSSEDM   |
| Q9CXY6 | 37   | VPHIPFDFYLCEMAFPRVKPA   |
| O89103 | 52   | KLSAAEAQHRCNENGGNLATV   |
| P17710 | 942  | HQTVKELSPKCTVSFLLSEDE   |
| P41216 | 242  | GSDLVERGKCGVEIISLAL     |
| P04075 | 240  | KPNMVTGPHACTQKFSHEEIA   |
| P15532 | 109  | SKPGTIRGDFCIQVGRNIIHG   |
| Q9H4A6 | 280  | QLLDLDPEVECLKANTNEVLW   |
| Q9D8N0 | 266  | APAPEEEMDECEQALAAEPKA   |
| P27695 | 65   | PSGKPATLKI CSWNVDGLRAW  |
| Q3TXS7 | 898  | QLKVLSTMTETCRYQPFKPLSI  |
| P84091 | 212  | MKSYLSGMPECKFGMNDKIVI   |
| Q80XN0 | 115  | DRLRTIQLNVCNSEEVEKAVE   |
| P78527 | 4045 | EKNWYPRQKICYAKRKLAPAN   |
| Q2TPA8 | 136  | TRGTYLTSKACIPFLKKSKEG   |
| Q8K297 | 364  | LRALHEQEIDCQLVEAVDGKA   |
| P61088 | 87   | HPNVDKLGRI CLDILKDKWSP  |
| P62754 | 83   | VRLLLSKSHSCYRPRRTGERK   |
| P34932 | 34   | ETIANEYSDRCTPACISFGPK   |
| P11499 | 564  | EESKAKFENLCKLMKEILDKK   |
| Q8QZS1 | 94   | IIKGAGGKAF CAGGDIKALSE  |
| Q3U5Q7 | 422  | MTYQRMENPSCHLVDASPSRE   |
| Q6PB66 | 207  | VTYQRLIAAYCNVGDIEGASK   |
| P48962 | 129  | SGGAAGATSLCFVYPLDFART   |
| Q64514 | 614  | LREGLHYTEVCGYDIASPNAG   |
| Q07065 | 100  | AAAAASSSASC SRRLGRALNF  |
| P21980 | 10   | XMAEELVLERCDLELETNGRD   |
| Q9QYI3 | 58   | YNYITKAIDMCPNNASYGGR    |
| Q8QZR5 | 238  | ARDRCCPRVLCVINPGNPTGQ   |
| Q9CPR4 | 15   | SLDPENPTKSCKSRGSNLRVH   |
| P50570 | 607  | YKDLRQIELACDSQEDVDSWK   |
| Q9D7X3 | 171  | GPNDGFLAQLCQLNDRLAKEG   |
| Q922B1 | 244  | TASQAAELRSCYLSSLDLLE    |

---

---

|        |      |                        |
|--------|------|------------------------|
| Q91V80 | 196  | GTALYYAIKNCSDKAKERGRD  |
| Q9WVQ5 | 187  | AHAMNEYPDSCAVLVRRHGVY  |
| P34932 | 417  | NSPAEEGSSDCEVFSKNHAAP  |
| P49327 | 1471 | RREPGGNRLRCVLLSNLSSTS  |
| Q8BIJ6 | 1002 | KHTSETADALCPRCAEVIGAK  |
| Q91WU5 | 33   | KTSADLQTNACVTRAKPVPSY  |
| Q9JIF0 | 364  | DFKGQLCELSASTDYRMRXXX  |
| Q64310 | 32   | KQYLPHVARLCLISTFLEDGI  |
| Q9QYB1 | 189  | LDGDEMTLADCNLLPKLHIVK  |
| Q922Q8 | 137  | VAGDCLDEKQCKQCANKVLQH  |
| Q9D517 | 217  | RTKGFTTAVQCLRGTVAAIYD  |
| Q8TEX9 | 708  | VFEEVFKLLECPHLNVRKAAH  |
| P14873 | 1913 | EKTERTIKSPCDSGYSYETIE  |
| P41216 | 55   | ATRPKALKPPCDLSMQSVEIA  |
| Q8BKC5 | 266  | EATLQLSLKLCGDTNLNMQR   |
| Q8BFZ1 | 72   | ILDAHTRKQICIVDKVTQTST  |
| P21817 | 2363 | VVRLLRKPECFGPALRGEFG   |
| Q9NVM4 | 262  | FSKQVSSSAACHSRRFEPLTS  |
| O70468 | 562  | VGAKDQAVFKCEVSDENVRGV  |
| Q9D289 | 149  | VTAEVSSMPACKFQVMIQKLX  |
| P30999 | 450  | DQDNKIAIKNCDGVPALVRL   |
| O08529 | 640  | ALEEAGFKLPCQLHQVIVARF  |
| O08663 | 468  | FEHTILLRPTCKEVVSRGDDY  |
| Q9WV35 | 71   | YSSGRNKTFLCYVVEVQSKGG  |
| Q924M7 | 197  | TEAMASALRNCFSHLMKSEKK  |
| Q9CZU6 | 101  | IRFRGYSIPECQKMLPKAKGG  |
| Q8CG76 | 222  | TRQVEAELLPCLRHFGLRFYA  |
| P62880 | 149  | LPGHTGYLSCCRFLDDNQIIT  |
| Q86VP6 | 571  | ATPYIKDLFTCTIKRLKAADI  |
| Q8TEX9 | 42   | LRAPAALPALCDLLASAADPQ  |
| P62736 | 376  | EAGPSIVHRKCFXXXXXXXXXX |
| P62838 | 111  | KVLLSICSLLCDPNPDDPLVP  |
| Q9ES28 | 328  | SPEAQQRVGGCFLSLMPQMRT  |
| Q9EST5 | 27   | AAVRELVLNCKAMDGKIEGL   |
| Q9Z2Z6 | 136  | GIMTPGERIKCLLQIQASSGE  |
| P62908 | 119  | LLGGLAVRRACYGVLRFIMES  |
| P49368 | 213  | KIPGGIIEDSCVLRGVMINKD  |
| Q9Z0X1 | 316  | GGGFLGSELACALGRKSQASG  |
| Q14684 | 197  | DQNLKFIDPFCKIAAKTKDHT  |
| P06213 | 1165 | FVHRDLAARNCMVAHDFTVKI  |
| O70433 | 254  | WHNDCFNCKKCSLSLVGRGFL  |
| Q9Z2I0 | 329  | NLTRPQLVALCKLLELQSIGT  |
| Q9GZT4 | 113  | YIVVPQTAPDCKKLAIQAYGA  |
| P80316 | 253  | VVDAKIAILTCPFEPKPKTK   |
| P47738 | 321  | FALFFNQGCCAGSRTFVQE    |
| Q99836 | 216  | SIASELIEKRCRRMVVVVSDD  |
| P50462 | 171  | DKDGELYCKVCYAKNFGPTGI  |
| P50544 | 216  | VASGQALAAFCLTEPSSGSDV  |
| P05125 | 129  | AGPRSLRRSSCFGGRIDRIGA  |
| P31749 | 296  | GHIKITDFGLCKEGIKDGATM  |
| P14618 | 474  | HLYRGIFPVLCKDPVQEAWAE  |
| P06151 | 163  | FPKNRVIGSGCNLDSARFRYL  |

---

---

|        |      |                        |
|--------|------|------------------------|
| Q60610 | 1227 | GPRQANRKAGCAVTSLASEL   |
| P17742 | 115  | PNTNGSQFFICTAKTEWLDGK  |
| Q8BIJ6 | 91   | SDMELEIQQKCGFSELYSWQR  |
| Q8VCT3 | 181  | QAVLNRAFFPCFDTPAVKCTY  |
| Q99MR8 | 591  | VLGDLSSSEDGCTYLKSSINGV |
| P42704 | 930  | SARLQWFCDRCVANNQVETLE  |
| Q99LB2 | 89   | GEGLSVTGIVCHVGKAEDREK  |
| Q9D0K2 | 456  | KGNAHKIMEKCTLPLTGKQCV  |
| Q9CPR4 | 144  | GRINPYMSSPCHIEMILTEKE  |
| Q02248 | 213  | QNTNDVETARCTAGTLHNLSH  |
| Q9CQJ8 | 103  | RYECYKVPEWCLDYWHPSEKA  |
| Q9CPP0 | 41   | PVTMDSFFFGCELSGHTRSFT  |
| Q60864 | 471  | CKEAADGYQRCMMAQYNRHDS  |
| Q16665 | 520  | SPEPNSPSEYCFYVDSDMVNE  |
| P06801 | 468  | FPGVALGVVACGLRHIDDKVF  |
| Q8BGQ7 | 903  | DNEAGKITCLCQVPQNAANRG  |
| P21333 | 810  | GQGDVSIKIKCAPGVVGPAAE  |
| O08749 | 477  | AALALEYGASCEDIARVCHAH  |
| Q9R0Y5 | 187  | GTVDTVFSEVCTYLDLXKXXX  |
| P21817 | 3635 | SKQRRRAVVAEFRMTPLYNLP  |
| O35855 | 229  | VRAWIGGVGDCKLGGNYGPTV  |
| P49327 | 634  | GLSWEECKQRCPPGVVPACHN  |
| Q8QZS1 | 270  | FEEHMDKINSCFSANTVEQII  |
| P20618 | 224  | DVYTG DALRICIVTKEGIREE |
| Q9JHR7 | 414  | EGPQEWVFQECKDLNAVAFRF  |
| Q9Z0N1 | 101  | LDDPSCPRPECYRSCGSSTPD  |
| Q15631 | 225  | RGFNKETAAACVEKXXXXXXXX |
| P05455 | 232  | EMKSLEEKIGCLLKFSGLDD   |
| Q14166 | 361  | RPGVLLNQFPENLLTVKDCL   |
| Q9WTP6 | 208  | VEYYRKRGIHCAIDASQTPDI  |
| Q8K298 | 970  | PFLSPLEGHICLKISCQVNSA  |
| P80314 | 395  | EAERSLHDALCVLAQTVKDPR  |
| Q9WTP6 | 232  | SILAAFSKATCKDLVMFXXX   |
| Q6PDY2 | 169  | RAEYTEASGPCVLTPHRDNLH  |
| Q99J39 | 447  | DSSLKGLTSSCGLMVNYRYL   |
| Q1XH17 | 144  | PQQMQLQEAACMRKEKTVAVL  |
| O15519 | 254  | YKMKSKPLGICLIIDCIGNET  |
| O08528 | 386  | QIVSTRSASLCAATLAAVLWR  |
| P63037 | 302  | GQIVKHGDIKCVLNEGMPYR   |
| P63318 | 296  | YNVPVADADNCSLLQKFEACN  |
| O70433 | 71   | WHEGCFHCSRCSGSSLVDKPFA |
| O08997 | 41   | FNIDLPNKKVCIDSEHSSDTL  |
| P47964 | 48   | KFVRDMIREVCGFAPYERRAM  |
| Q8R127 | 98   | MAKQAKLVLNCGVPYRFYGE   |
| Q8BK08 | 78   | ETARWITVGNCLHKTAVLAGT  |
| P07814 | 105  | FTSTINELNHCLSLRXYLVGN  |
| Q9D6Y7 | 107  | HTRNPTYKEVCSEKTGHAEVV  |
| Q6ZPY7 | 1187 | LDPHTSHSWLCDGRLCLHDP   |
| O88544 | 70   | VISRQLLTDFTHLPLNLPDST  |
| P62258 | 97   | QMVETELKLIACDILDVLDKH  |
| P19096 | 893  | RVIFPGTGYLCLVWKTARSL   |
| Q9JK42 | 195  | PKHIGSIDPNCVSDVVKDAY   |

---

---

|        |      |                         |
|--------|------|-------------------------|
| Q91VM9 | 67   | PFHDIPLKADCKEEHDIPRKK   |
| Q8R1H0 | 68   | WRRSEGLPSECRSVTDXXXXX   |
| Q9CQT1 | 199  | HEMGRLEHTFCTETRPYNQGA   |
| P27546 | 636  | ETPGSQPSEPESGVSROEEAK   |
| P63028 | 172  | FFKDGLEMEKXXXXXXXXXX    |
| Q9WV34 | 310  | LELTPTSGTLCGSLSGKKKKR   |
| P23229 | 86   | RANRTGGLYCDITARGPCTR    |
| Q8BRK8 | 490  | RSGSSTPQRS CSAAGLHRARS  |
| Q61151 | 106  | LVDYITISRGCLTEQTYPEVV   |
| P16125 | 294  | IENEVFLSLPCILNARGLTSV   |
| Q8BH86 | 252  | APLAFASPPGCMVMVPKDTAS   |
| Q9QYB1 | 100  | KIEEFLEEVLCPPKYLKLSPK   |
| Q9DC61 | 265  | VGVEHEHLVECAKYLVGAEF    |
| P62820 | 126  | NVNKLLVGKCDLTTKKVVDY    |
| Q9DB77 | 192  | YKNALANPLYCPDYRMGKITS   |
| O35215 | 57   | TLLMNKSTEPCAHLLVSSIGV   |
| P21980 | 98   | WTATVVDQODCTLSLQLTTPA   |
| Q8BVE3 | 73   | QEMLQTEGSQCAKTFINLMTH   |
| Q9CR51 | 69   | EAAALGSHGSCSSEVEKETRE   |
| Q9DBB5 | 52   | RSLPGATAAECASNKKIYTV    |
| P35247 | 35   | TYSHRTMPACTLVMCSSVES    |
| O00232 | 255  | KHYRAIYDTPCIIQAESKWOQ   |
| P53395 | 279  | AALKIPHFGY CDEIDLTLQLVK |
| P23229 | 541  | PSGICLQVKS CFEYTANPAGY  |
| P00533 | 190  | FQNHGSCQKCDPSCPNGSCW    |
| Q92945 | 436  | EMTFSIPTHKCGLVIGRGGEN   |
| Q99MK8 | 439  | LQRDVNRRLGCLGRGAQEVKE   |
| P70695 | 282  | PNGKLRLLYE CNPVAYIIEQA  |
| Q09666 | 2806 | DVSGPKVDVECPDVNIEGPEG   |
| P84086 | 90   | AEEKAALQPCGSLTRPKKA     |
| P04406 | 247  | TANVSVVDLTCRLEKPAKYDD   |
| Q9QVP4 | 164  | LAGNIDYKSLCYIITHGDEKE   |
| Q8K1M6 | 351  | QLITKFATEYCNTEIEGTAKYI  |
| Q9DCZ1 | 316  | LDILGGLRSTCTYVGAACKLKE  |
| P30050 | 17   | PNEIKVVYLRCTGGEVQATSA   |
| P47754 | 157  | KVDGQQTIIACIESHQFQAKN   |
| Q9DCS1 | 41   | SALAKLLLAGCSLLRIPASAS   |
| P30086 | 168  | YELRAPVAGTCYQAEWDDYVP   |
| Q7Z6M4 | 219  | VQOVTKILHSCPSVLREDLGO   |
| P45880 | 47   | LVKLDVKTKSCSGVEFSTSGS   |
| P46782 | 155  | RRVNQAIWLLCTGAREAAFRN   |
| Q8K2B3 | 536  | FRVGSVLQEGCEKISQLYGDL   |
| Q8K2B3 | 357  | MTLEIREGRGCGPEKDHVYLO   |
| Q91YT0 | 206  | FVVRGAGAYICGEETALIESI   |
| P70698 | 30   | ASSVGTILKSCGLHVTSIKID   |
| Q91VD9 | 727  | GAQAVEEPSIXXXXXXXXXX    |
| Q96EK6 | 128  | RVEDVVVSDECRGKQLGKLLL   |
| Q64737 | 93   | VGDLTSAGVRCFGPTAQAAQL   |
| O55143 | 669  | ELSPSAQRDACLNARCFARVE   |
| Q05816 | 127  | IVECVMNNATCTRVYEKVQXX   |
| P52480 | 31   | AMADTFLEHMCRLDIDSAPIT   |
| Q9R062 | 89   | ELGITLTKLHCWSLTQYSKCV   |

---



---

|        |      |                         |
|--------|------|-------------------------|
| P60603 | 15   | VGPYQSQPSCFDRVKMGFVM    |
| Q62407 | 1697 | LERMARKPTVCESETRTYMRQ   |
| Q9CZW5 | 179  | LQKWKEVAQDCTKAVELNPKY   |
| O08663 | 380  | GKGVVHDDMECSHYMKNFDVG   |
| Q9JII6 | 260  | LRWQVQRKVICIPKSINPSRI   |
| P21266 | 39   | DTSYEEKRYTCGEAPDYDRSQ   |
| P02463 | 1460 | RHSQTTDDPLCPPGTKILYHG   |
| Q8VE95 | 132  | SDSESPRLSYCGGGEALAI PF  |
| O70370 | 335  | NKNHCGIASYCSYPEIXXXX    |
| Q9Y272 | 11   | MKLAAMIKKMCPDSELSIPA    |
| Q9D051 | 263  | AAVLSKEGIECEVINLRTIRP   |
| Q80XN0 | 288  | DEKIAKMETYCNSGSTDTSSV   |
| P36873 | 158  | LWKTFTDCFNCLPIAAIVDEK   |
| P47809 | 244  | LLDRSGNIKLDFGISGQLVD    |
| P51637 | 19   | LEARIIKDIHCKEIDLVRNDP   |
| Q9Z1W9 | 249  | KVRKTFVGTPCWMAPEVMEQV   |
| Q6NVF9 | 159  | LHGQSPVVTPCNKQFLSQFEM   |
| Q60597 | 904  | DPHKVKRLLFCGTGVYYDLTR   |
| O75828 | 227  | KADRILVNACCPGPVKTDMDG   |
| Q04760 | 61   | RVLGMTLIQKDFPIMKFSLY    |
| Q9UHB9 | 562  | KPLVERFETFCLDPSLVTKQA   |
| Q2TPA8 | 218  | MLGGSGVENQCRKVDIIADAA   |
| P23242 | 260  | TTGPLSPSKDCGSPKYAYFNG   |
| Q9QVP4 | 53   | CIDQNRDGIICKSDLKETYSQ   |
| Q8VHX6 | 713  | LKLYAQDADGCPIDIKVIPNG   |
| O75153 | 753  | LKDAAAFLLSCQIPGLVKDCM   |
| Q60936 | 403  | DVLRRELTLECDYQREAAAYAK  |
| P58059 | 49   | ISRRRYYEKPCRRRQRESYET   |
| P50995 | 294  | AIKGVGTDEACLIEILASRSN   |
| Q8VBW6 | 153  | LWNSQIPLLICRTYGLVGYMR   |
| Q8BZF8 | 165  | ISKTIIEEYAI CPDLRIDLSRL |
| P06801 | 47   | QLNIHGLLPPCIISQELQVLR   |
| P28663 | 103  | KKADPQEAINCLNAAIDIYTD   |
| P07744 | 457  | TYRKLLEGEECRMSECKSAV    |
| P55264 | 105  | EPHKAATFFGCIGIDKFGEIL   |
| Q8VEM8 | 131  | TLIGYSMQGLCKFGFYEVFKA   |
| Q9ESW4 | 34   | WGGHWLYGKHCDNLLRRAACQ   |
| P48507 | 72   | LVREFPDVLECTVSHAVEKIN   |
| P18669 | 153  | ADLTEDQLPSCESLKDTIARA   |
| P53621 | 245  | NESKAWEVDTCRGHYNNVSCA   |
| Q9WUA3 | 410  | LPDEKIVKSN CNVAVINVGAP  |
| Q8K0D5 | 723  | YTMEYCRYQPCSPSTQEELIN   |
| O70305 | 447  | EEKYTAVQRNCSDREGHPNT    |
| P17844 | 200  | YCRACRLKSTCIYGGAPKGPQ   |
| O43175 | 281  | ALVDHENVISCPHLGASTKEA   |
| Q96EL3 | 21   | RPVKQVRVQFCPFKKNVETR    |
| P05202 | 212  | PEQSVLLLHACAHNPTGVDPR   |
| O14983 | 349  | VETLGCTSVICSDKTGTLTN    |
| Q99MR8 | 58   | VLIANRGEIACRVIRTAKKMG   |
| P84091 | 246  | SGKQSI AIDDCTFHQCVRLSK  |
| P11172 | 174  | QAHGIRLHSVCTLSKMLEILE   |
| Q9P2E9 | 892  | KRLDEVSRRELCHTQSSHASLR  |

---

---

|        |      |                                         |
|--------|------|-----------------------------------------|
| P35579 | 569  | PKQLKDKADF <b>C</b> IIHYAGKVDY          |
| Q8BVF2 | 128  | LHLYKQGIPL <b>C</b> SLINHHLGL           |
| Q8CEI1 | 110  | GLRIFTSVPK <b>C</b> XXXXXXXXXX          |
| Q9CQR2 | 56   | FNGQFKTYGI <b>C</b> GAIRRMGESD          |
| P62317 | 63   | LGRVKAFDRH <b>C</b> NMVLENVKEM          |
| P35486 | 261  | GLRVDGMDIL <b>C</b> VREATKFAAA          |
| Q8BGD5 | 582  | LAHFRDRGQF <b>C</b> LTYESAMTRL          |
| Q9DB43 | 230  | DDRTAGIHGD <b>C</b> DDDKYRRRPA          |
| Q6NZJ6 | 825  | FSVAYANMCR <b>C</b> LMALKVPTTE          |
| P78527 | 3347 | IANALSSEPA <b>C</b> LAEIEEDKAR          |
| Q8K0G5 | 198  | TAGRWSPPHN <b>C</b> TQVATASDTT          |
| Q8VCW8 | 503  | DIALMDEQGF <b>C</b> KIVGRSKDMI          |
| Q15369 | 11   | MDGEEKTYGG <b>C</b> EGPDAMYVKL          |
| P60766 | 157  | RDLKAVKYVE <b>C</b> SALTQKGLKN          |
| P02463 | 1493 | HGQDLGTAGS <b>C</b> LRKFSTMPFL          |
| P45983 | 116  | IVMELMDANL <b>C</b> QVIQMELDHE          |
| B1AR13 | 81   | VCGRSKNQPF <b>C</b> DGSHFFQRTG          |
| P53811 | 187  | WKKELANTPD <b>C</b> PRMCAYKLV           |
| Q922B2 | 267  | CICADFEKVF <b>C</b> IGPVFRAEDS          |
| P63005 | 252  | PNQDGTLIAS <b>C</b> SNDQTVRVWV          |
| P14618 | 423  | AVGAVEASF <b>C</b> CSGAIIVLTK           |
| P33992 | 482  | AGITTTLNSR <b>C</b> SVLAAANSVF          |
| P63254 | 7    | XXXXMPKCPK <b>C</b> DKEVYFAERV          |
| Q62523 | 376  | QRQSVAVNES <b>C</b> GKCNQPLARA          |
| Q14103 | 226  | DNKTNKRRGF <b>C</b> FITFKEEPPV          |
| Q9Z110 | 674  | LRTEYGDLEV <b>C</b> IEVVDSVQEA          |
| Q924M7 | 29   | GKVGSKSEVA <b>C</b> LLASSDPLAQ          |
| Q8BTM8 | 8    | XXXMSSSHSR <b>C</b> GQSAAVASPG          |
| Q8BWF0 | 490  | VNEGLISSVE <b>C</b> PFGGVKQSG           |
| Q3LXA3 | 404  | ALDRAAGDGD <b>C</b> GTTHSRAARA          |
| Q9R0P3 | 206  | ESKWKAYDAT <b>C</b> LVKAYSGSQI          |
| Q9WTL7 | 171  | GSAKDLAILQ <b>C</b> HGELDPMVPV          |
| Q61316 | 167  | MDATQIAGLN <b>C</b> LRLMNETTAV          |
| Q91V76 | 249  | HFYEMKAPLV <b>C</b> LPVFSKDPG           |
| P62879 | 317  | VLAGHDNRVS <b>C</b> LGVTDDGMAV          |
| P29474 | 853  | GWVRDPRLPP <b>C</b> TLRQALTFFL          |
| Q99JI6 | 141  | GQNLARQWNN <b>C</b> AFLESSAKSK          |
| Q9R0P3 | 158  | HSMGGHGALI <b>C</b> ALKNPCKYRS          |
| Q15185 | 75   | KHKRTDRSIL <b>C</b> CLRKGESGQS          |
| P36552 | 362  | PSYVPIVKKH <b>C</b> DDSYTPRDKL          |
| P99028 | 51   | CVKARERLEL <b>C</b> DNRVSSRSQT          |
| P36873 | 155  | NIKWLKTF <b>C</b> FNCLPIAAIV            |
| Q6PGB6 | 79   | QKRLYIMTLG <b>C</b> LAPYRRLGIG          |
| P80318 | 372  | FITDCKDPK <b>C</b> ACTILLRGASKE         |
| O09131 | 236  | NLYLQDSPEA <b>C</b> DYGLXXXXXX          |
| P39687 | 123  | ENLKSLDLFN <b>C</b> EVTNLNDYRE          |
| Q8BGH2 | 445  | GNIARLELNY <b>C</b> IPMGVQGGDR          |
| Q9WTP7 | 85   | ALHELKTLTQ <b>C</b> SWLLDGFPR           |
| Q99JB8 | 402  | KMSEEDEQGW <b>C</b> QGQLOSGRIG          |
| Q8BGC4 | 218  | EKA AFLK <b>C</b> DRPINYRTEP            |
| P54071 | 402  | IRFAQTLEKV <b>C</b> VQTVESGAMT          |
| Q501J6 | 219  | IRDLER <b>C</b> VEI <b>C</b> IATPGRLIDF |

---

---

|        |      |                         |
|--------|------|-------------------------|
| P62829 | 28   | LGLPVGAVINCADNTGAKNLY   |
| Q99MN9 | 367  | VGNQPNVASGCLDINSSVKGA   |
| O00429 | 367  | TSELCGGARI CYIFHETFGRT  |
| Q06203 | 348  | KCGLPYVEVLCKNRYVGRTFI   |
| Q9QZ73 | 29   | TQSSEKTAVSCLSQNDWKLDV   |
| Q9Y3B4 | 83   | ACDHLSGFNVCNRYLVVLYYN   |
| O55229 | 72   | RRARPEELSVCPVSGGLSNLL   |
| Q8CDN6 | 149  | NESDEHGFDNCLRKDMSFLES   |
| Q9DCM0 | 98   | TGVLRSLLPGCQSVISRLSGA   |
| Q91YE3 | 58   | RQDWKKHKLVCQGGEAPRAQP   |
| P13639 | 651  | WDVAEARKIWCFGPDGTGPNI   |
| P62736 | 219  | EIVRDIKEKLCYVALDFENEM   |
| P50462 | 79   | KGIGFGQGAGCLSTDTGEHLG   |
| P67936 | 154  | EERAEVSELKCGDLEELKNV    |
| P18760 | 39   | VKKRKKAVLFC LSEDKKN IIL |
| P55264 | 352  | AASVIIRRTGCTFPEKPDFHX   |
| O00429 | 644  | RKLSAREQRDCEVIERLIKS Y  |
| Q13557 | 373  | NGDFEAYTKICDPGLTAFEPE   |
| Q9WVL0 | 16   | PILYSYFRSSCSWRVRIALAL   |
| P67775 | 266  | VVTIFSAPNYCYRCGNQAAIM   |
| Q7L5N1 | 143  | PSDIHVHKQVCEIIESPLFLK   |
| Q920E5 | 332  | YNRLKSLIEQCSAPLPPSIFM   |
| Q99MK8 | 72   | KLGYLLFRDFCLNHLEEA KPL  |
| Q9DC69 | 86   | MGSQVIIPYRCDVYDIMHLRL   |
| Q9QZD9 | 76   | HVLTGSADNSCRLWDCETGKQ   |
| Q8K0W9 | 66   | KVIYDKDQFMCGETVPAPSTN   |
| P05201 | 160  | AAGFKDIRPYCYWDAEK RGLD  |
| Q9Z1W9 | 536  | KTLTFKLASGCDGSEIPDEVK   |
| P13010 | 249  | KIERHSIHWP CRLTIGSNLSI  |
| Q8VE95 | 109  | LCGRERNFLRCEDRPVVFTHL   |
| P27635 | 71   | SSEALEAARI CANKYMKVSCG  |
| P97821 | 447  | YFRIRRGTDCEAIESIAVA AI  |
| P62983 | 144  | SHFDRHYCGKCLTYCFNKPE    |
| P98170 | 327  | WEQHAKWYPGCKYLLEQKGQE   |
| P40936 | 231  | VVEKAIQDAGCQVLKCN CVSL  |
| Q921G7 | 591  | NAQNCVHCKTCDIKDPSQNIN   |
| P78527 | 2342 | ERKNILEESLCELVAKQLKQH   |
| Q9DCL9 | 63   | KAAISNKITSCIFQLLQEAGI   |
| O55143 | 377  | FILDKVEGDTCSLNEFSITGS   |
| Q9ER88 | 379  | GRKELRFLSN CNPEQLERLCA  |
| Q9DBC0 | 220  | LGIPTRAGACVTSESTVMRD    |
| Q9JLI6 | 304  | GKAADLVSENCETYEAHMRDI   |
| Q07076 | 338  | GEGRLGTDESCFNMILATRSF   |
| Q8BKZ9 | 170  | TOPSPQPQIPCPARKEHKGTA   |
| Q96EP5 | 124  | KIFVGGIPHNCGETELREYFK   |
| Q791V5 | 296  | FRKVPCGKTYCYDLRMLI XXX  |
| O08573 | 73   | PRFEEGGYVVCNTKQNGQWGP   |
| Q03265 | 244  | DGTDEKKKLYCIYVAIGQKRS   |
| P70698 | 216  | GLGLSPDLVVCRC SNPLDTSV  |
| P13010 | 296  | KEDIQKETVYCLNDDDETEVL   |
| Q9WUB3 | 172  | YEFGIFNQKICGGWQMEEADD   |
| P23229 | 131  | SQGPGGKVVTCAHRYEKRQHV   |

---

---

|         |      |              |             |
|---------|------|--------------|-------------|
| Q9Z0S1  | 249  | ASPGCKKWDTC  | CAPEVILHAVG |
| Q61425  | 99   | GDEFVEKTLSC  | CLSTSTDAASV |
| Q60759  | 176  | PGLAKGELLGC  | FLTEPNHGS   |
| Q61234  | 220  | SLKMAYVSRRCT | PTDPEPRYL   |
| Q924D0  | 130  | GRDVSQVVMCC  | GLDVKYFQPG  |
| Q8R0F8  | 68   | EGSPVLMPAYC  | RNLHHEVELG  |
| Q9D6R2  | 127  | TFDLYANVRPC  | VSIIEGYKTPY |
| P80316  | 493  | KESNPALGIDC  | LHKGSNMQY   |
| Q9C XK8 | 36   | LLVDRPDGTYC  | FRLHNDRVYY  |
| Q9Y570  | 312  | FRGLSNLFLSC  | PIPKLLLLLAG |
| P05202  | 382  | QHITDQIGMFC  | FTGLKPEQVE  |
| P41250  | 471  | CADRSCYDLS   | CHARATKVPLV |
| P14206  | 148  | SYVNLPTIALC  | NTDSPLRYVD  |
| P17918  | 135  | QLGIPEQEYSC  | VIKMPSGEFA  |
| Q91WD5  | 146  | FDRLDYVSMCC  | NEQAYSIAVE  |
| P10809  | 447  | VLGGGCALLRC  | IPALDSLTPA  |
| P12814  | 480  | PSVNARCQKIC  | DQWDNLGALT  |
| Q8BH59  | 375  | GELMYKNSFDC  | FKKVLRYEGF  |
| P35235  | 104  | DVIELKYPLNC  | ADPTSERWFH  |
| O08528  | 375  | QEDCVATHRIC  | QIVSTRSASL  |
| Q00610  | 151  | MFD RHSSLAGC | QIINYRTDAK  |
| P70349  | 84   | LGHLMIVGKKC  | AADLGLKRGY  |
| Q8CC88  | 857  | EADKAPTNTVC  | ILKTLVENGE  |
| Q8BGK2  | 23   | VGDALGYGNIC  | RENSVLGSIQ  |
| Q791V5  | 79   | GLFTGLTPRLC  | SGVLGTVVHG  |
| P43235  | 139  | PVKNQOQCGSC  | WAFSSVGALE  |
| Q6PE15  | 116  | IGSSDGNLAE   | CTVGKWRKDVL |
| P62962  | 128  | GVHGGLINKKC  | YEMASHLRRS  |
| Q99798  | 592  | LQILIKVKGKC  | TTDHISAAGP  |
| Q9H2U2  | 180  | VCEIGSKILSC  | GEVIHVKILG  |
| Q8QZS1  | 44   | AAEVLLERRGC  | GGVITLNRPK  |
| Q3U186  | 576  | GMKLLGITPVC  | RMXXXXXXXXX |
| O88342  | 225  | IYDGKTGEKVC  | ALGESKAHDG  |
| Q9CPU4  | 56   | TDPENGHMFNC  | IQRAHQNTLE  |
| Q9CR68  | 51   | PVL DVKRPFLC | RESLSGQAAA  |
| Q9DAK9  | 39   | AEP SGDPAKEC | KEIVRGYKWA  |
| O08573  | 258  | DATRFHINLRC  | GGDIAFHLNP  |
| P09541  | 74   | TGEMKITYGQC  | GDVLRALGQN  |
| Q99JY9  | 34   | NTEPQFIIPSC  | IAIKESAKVG  |
| Q8BMP6  | 484  | DEIVPVYRRDC  | CHEEVYAGSHQ |
| Q78PY7  | 228  | LVTVMLSGIKC  | PTFRRET DGS |
| Q9D172  | 242  | NKVVTTPAFMC  | ETALHHIH DG |
| Q99J09  | 172  | SYRAHAGQVTC  | VAA SPHKDSV |
| P07814  | 856  | PKAKINEAVEC  | LLSLKAQYKE  |
| P70460  | 332  | TTSE AHPSTPC | SSDDSDLERV  |
| Q80X90  | 991  | ILSPSRKVVP   | CLVAPVAGREC |
| P54886  | 606  | KVTRLVRDSKC  | EYPAACNALE  |
| Q9D7N6  | 138  | LPTEETMSSTC  | CLKSTGELVVQ |
| Q9Z0X1  | 440  | SNIWVAGDAAC  | FYDIKLGRRR  |
| Q14152  | 478  | ERAIVDAARHC  | DLQVRIDHTS  |
| Q6PAR5  | 71   | TSAEASPAECC  | QHAKILEDTO  |
| Q9BQG0  | 1031 | TGPVRPRHQAC  | LLLQKTL SMR |

---

---

|        |      |                                 |
|--------|------|---------------------------------|
| Q2TPA8 | 166  | NLNPLWFKQH <b>C</b> AYTIAKYGMS  |
| P14174 | 81   | AQNRSYSKLL <b>C</b> GLLAERLRIS  |
| Q9ER72 | 488  | LHTGHLTIAG <b>C</b> KMSKSLKNFI  |
| P15170 | 453  | RPRFVKQDQV <b>C</b> IARLRTAGTI  |
| Q9JKV1 | 88   | DDCEFKRVPQ <b>C</b> PSGRVYVLKF  |
| P62918 | 195  | AYHKYKAKRN <b>C</b> WPRVRGVAMN  |
| Q8R1B4 | 79   | NAMKIRDVTK <b>C</b> LEEFELLGKA  |
| Q8CI94 | 808  | WTKKVIRNIA <b>C</b> SGKFSSDRTI  |
| Q6PB66 | 1321 | ELRDNDKVYS <b>C</b> SMKSYALDKD  |
| Q99LX0 | 46   | AGLAGKDPVQ <b>C</b> SRDVMICPDT  |
| Q9JI91 | 187  | HTSWKDGLGL <b>C</b> ALIHRHRPDL  |
| Q6PB66 | 129  | SNQALLLLRS <b>C</b> GSLLPELSLA  |
| Q80X85 | 152  | YRIFHEALKN <b>C</b> EPVIGLVPIL  |
| O88844 | 73   | AIKKYNVGVK <b>C</b> ATITPDEKRV  |
| Q9JMA1 | 257  | FGVEFETTMK <b>C</b> TESEEEEEVTK |
| P51174 | 351  | ICVTRAFVDS <b>C</b> LQLHETKRLD  |
| Q7TNG5 | 395  | THPSRAQFVT <b>C</b> GQDKLVHLWS  |
| Q7TMK9 | 96   | SHVQNKSAFL <b>C</b> GVMKTYRQRE  |
| P00533 | 470  | DVIISGNKNL <b>C</b> YANTINWKKL  |
| Q9R190 | 209  | AVGTFARALD <b>C</b> SSSIRQPSLH  |
| Q9DCZ1 | 186  | IKVGVGPGSV <b>C</b> TTRTKTGVGY  |
| Q09161 | 477  | DIVPPTFSAL <b>C</b> PANPTCIYKY  |
| P30050 | 141  | EILGTAQSVG <b>C</b> NVDGRHPHDI  |
| Q8BFP9 | 419  | YKANHEADDW <b>C</b> VPSREPKDMT  |
| P18031 | 215  | SPEHGPVVVH <b>C</b> SAGIGRSGTF  |
| P41216 | 133  | SYKEVAELAE <b>C</b> IGSGLIQKGF  |
| P61247 | 201  | DSIGKDIEKA <b>C</b> QSIYPLHDVF  |
| O08992 | 119  | IKQGIREVIL <b>C</b> KDQDGKIGLR  |
| P49915 | 456  | RVICAEOPYI <b>C</b> KDFPETNNIL  |
| P12658 | 100  | LLFRCQQLKS <b>C</b> EEFMKTWRKY  |
| Q9GZT3 | 48   | HFAQFGHVRR <b>C</b> ILPFDKETGF  |
| P04271 | 85   | MAFVAMVTTA <b>C</b> HEFFEHEXXX  |
| Q6ZQ73 | 240  | SPA AIRTLIQ <b>C</b> LGSVGRQAGH |
| Q1XH17 | 313  | VVSSSGRRVE <b>C</b> SDQKAPPAGE  |
| Q9EST5 | 124  | CLKSLDLFGC <b>C</b> VTNRSDYRET  |
| Q92769 | 262  | MYQPSAVVLQ <b>C</b> GADSLSGDRL  |
| Q9CQS2 | 28   | KKFDPMQQT <b>C</b> SAHPARFSPD   |
| P05201 | 391  | YLLPSGRINM <b>C</b> GLTTKNLDYV  |
| O14983 | 344  | RSLPSVETLG <b>C</b> TSVICSDKTG  |
| P60900 | 161  | VYKCDPAGYY <b>C</b> GFKATAAGVK  |
| P62932 | 687  | KTDP IRLTSM <b>C</b> QPQEKARES  |
| O60443 | 156  | QVLEGRNEVL <b>C</b> VLTQKITTMQ  |
| P97822 | 87   | SGGLEVLAEK <b>C</b> PNLTYLNLSG  |
| Q9NYY3 | 26   | KMCEQALGKG <b>C</b> GADSKKKRPP  |
| Q99KN2 | 245  | SGSDPSWKCI <b>C</b> TLSGFHTRTI  |
| A2APY7 | 98   | RDFPLALDIG <b>C</b> GGRGYIAQHLD |
| Q91ZA3 | 107  | VHVKMADEAV <b>C</b> VGPAPTSKSY  |
| Q922B1 | 184  | SLGGGGVDG <b>C</b> IHRAAGSLLT   |
| P21817 | 3193 | VEKLRPALGE <b>C</b> LARLAAAMPV  |
| P60981 | 147  | ANGPEDLNRA <b>C</b> IAEKLGGSLI  |
| P35285 | 9    | XXMALRELKV <b>C</b> LLGDTGVGKS  |
| P12814 | 332  | LHKPPKVQEK <b>C</b> QLEINFNTLQ  |

---

---

|        |      |              |              |
|--------|------|--------------|--------------|
| P24270 | 377  | GPNYLQIPVNC  | PYRARVANYQ   |
| Q8BJW6 | 377  | PDGEHILTATC  | APRLRVNNGY   |
| O08709 | 47   | FSHPRDFTPVCT | TELGRAAKL    |
| Q60597 | 395  | MGKTKAEQFYC  | GDTEGKKVMS   |
| P21980 | 230  | VGRVVS GMVNC | NDDQGVLLGR   |
| Q8BTM8 | 2199 | EIVEGENHTYC  | IRFVPAEMGM   |
| Q9DCS3 | 345  | IRQGRLTAPSC  | SEVPLQGYQQ   |
| P16546 | 1622 | MGNSLIERGAC  | AGEDAVKAR    |
| Q6P3A8 | 380  | EPFYIPDKWKC  | YDALRKMINY   |
| P61081 | 47   | DINELNLPKTC  | DISFSDPDDL   |
| P45376 | 81   | QDLFIVSKLWC  | TFHDKSMVKG   |
| Q8R086 | 300  | STARWAGARLC  | DVLAQAGHRL   |
| Q91YT0 | 286  | FNISGHVNHPCT | VEEEMSVPL    |
| Q61184 | 317  | KEYKKIIVSLC  | TAKMFFVESS   |
| P17563 | 31   | GPREEIVYLP   | CIYRNTGTEAP  |
| P63085 | 159  | KPSNLLLNTTC  | DLKICDFGLA   |
| Q7TNS2 | 13   | ESELGRKWDR   | CMADTVVKLGT  |
| P49458 | 48   | LCVKVTDDLVC  | LVYKTDQAQD   |
| Q9JLJ2 | 267  | GKSPLIIFSDC  | NMENA VKGAL  |
| P98170 | 213  | CGGKLNWEP    | CDRAWSEHRRH  |
| P55072 | 105  | RLGDVISIQPC  | PDVKY GKRIH  |
| Q8K1X1 | 515  | LLHKELSVHSC  | EVKGI EW TSL |
| Q8R3F5 | 270  | MLPVSGGFHTC  | LMEPAVDPLM   |
| O88342 | 325  | VIKHSKSIQCL  | TVHRNGGKS    |
| P17844 | 234  | TPGRLIDFLEC  | GKTNLRRTTY   |
| O70546 | 1303 | KYCLLRTLKQC  | QTLREALIAA   |
| P37268 | 6    | XXXXXMEFVKC  | LGHP EEFYNL  |
| Q68FD5 | 459  | EKWLKEDKLEC  | SEELGDLVKS   |
| Q8JZN5 | 617  | ROILEKRAYIC  | AHPLDRASXX   |
| Q9D883 | 169  | EMGECTRGGFC  | NFMHLKPI SR  |
| Q9Z1P6 | 55   | PSHKLSNNYYC  | TRDGRREVVP   |
| Q6P8J7 | 397  | VIDGVNYLVD   | CEKKLERGQDI  |
| P12277 | 254  | GNMKEVFTRFC  | TGLTQIETLF   |
| P67984 | 25   | KKQVLKFTLDC  | THPVEDGIMD   |
| Q8C7B8 | 722  | FILGHLETRQC  | ELASTMLTAA   |
| P34914 | 512  | MSKNMEKWIPC  | LKRGHIEDCG   |
| P80318 | 455  | EVIPRTLIONC  | GASTIRLLTS   |
| Q8BIJ6 | 819  | ENEKDPKRRSC  | QTALAEILDV   |
| O88342 | 382  | TVNESEQLVSC  | SMDDTVRYTN   |
| Q9D7S9 | 20   | PKAPPSLTD    | CIGTVDSRAES  |
| Q924X2 | 462  | WFDKSFTLISC  | KNGLLGLNTE   |
| Q9CR76 | 156  | TFWGWRQDTC   | AVSDMIPLSE   |
| P83731 | 6    | XXXXXMKVELC  | SFSGYKI YPG  |
| P36405 | 118  | AELLEEEKLS   | CVPVLIFANKQ  |
| Q91VD9 | 64   | EKVGMOIPRF   | CYHERLSVAGN  |
| Q12879 | 320  | FSYIPEAKASC  | YGQMERPEVP   |
| Q922B1 | 212  | NCETGKAKIT   | CGYRLPAKYVI  |
| P62070 | 55   | PTIEDSYTKQC  | VIDDRAARLD   |
| Q921M4 | 981  | RERPGLGSNPC  | IPFFYRADEN   |
| P09651 | 43   | HFEQWGTLTD   | CVVMRDPNTRK  |
| O55222 | 42   | DHGFSPLHWAC  | REGRSAVVEM   |
| Q9WUQ2 | 161  | FSNEPLQKVC   | FNHDNTLLAT   |

---

---

|        |      |                          |
|--------|------|--------------------------|
| P01111 | 118  | DVPMVLVGNKCDLPTRTVDTK    |
| Q924X2 | 548  | KALADDVELYCFQFLPFGKGL    |
| Q80UJ7 | 322  | VRVRKADNPQCLLGDFVTEFL    |
| O88844 | 269  | MKSEGGFIWACKNYDGDVQSD    |
| P36873 | 245  | FLHKHDLDLICRAHQVVEDGY    |
| O60716 | 394  | SNAAYLQHLCYRNDKVKTDV     |
| Q9CQS4 | 127  | AHPCIVLRRQCQVNYHARHYH    |
| Q8R1H0 | 34   | VNKHPDPTTLCILIAAEAGLTE   |
| Q80X90 | 1434 | VKIAGPGLSSCVRACIPQSFT    |
| P35754 | 8    | XXXMAQEFVNCIKIQPGKVVVF   |
| Q9Z2Z6 | 58   | QPPMYSGTLD CFRKTLMREGI   |
| Q99JX7 | 587  | SGMNLEWSQKCLQDNNWDYTR    |
| O15523 | 315  | GQQIRDLERGCHLLVATPGRL    |
| P30416 | 328  | RLASHLNLAMCHLKLQAFSAA    |
| Q91VI7 | 80   | LVLQGLQNPTCKIQKLSLQNC    |
| Q9Z2W0 | 36   | SPSPFHVVAECRSRLLOAGFR    |
| P00533 | 291  | PEGKYSFGATCVKKCPRNYVV    |
| Q9CZ42 | 78   | QDGRIGIVGGCQEYTGAPYFA    |
| O00170 | 208  | AAAKYYDAIACLKNLQMKQEP    |
| P54071 | 336  | SLGLMTSVLVC PDGKTIEAEA   |
| Q9Y696 | 234  | AYSRDEFTNTCPSDKEVEIAY    |
| Q8BFR5 | 147  | MITGTAPLDGCILVVAANDGP    |
| P04083 | 324  | FYQKMYGISLQAILDETKGD     |
| Q8K1M6 | 367  | TAKYIETSEL CGGARICYIFH   |
| P61750 | 62   | NVETVEYKNICFTVWDVGGQD    |
| Q3U0V1 | 297  | IGDPYKVQQA CEMVMDILRER   |
| Q11011 | 67   | AEVSPINYSLCLKPDLDFTF     |
| P50136 | 175  | DYPLELFMSQCYGNVNDPGKG    |
| Q9CWJ9 | 325  | FGDFVALSDICDVPTAKIISR    |
| P21333 | 1260 | EPAVDTSGVQCYGPGIEGQGV    |
| Q8BH59 | 487  | LFGLYKGAKACFLRDIPPSAI    |
| Q3TC72 | 214  | WLLGKTFDTFCPLGPALVTKD    |
| P49312 | 175  | QKYHTVNGHNC EVRKALSKQE   |
| O08756 | 58   | ESQAKKLGESCIFAPANVTSE    |
| P34914 | 312  | EIEEYAMELLCKEMVTFLDKL    |
| Q6NS46 | 1229 | VDPDVPRAFLCLSLIGPYRLE    |
| Q14444 | 226  | DLLEGKEKPVCGTTYKVLKEI    |
| Q8BVA5 | 185  | PNGKFATPFLCQFRYLLYATS    |
| P11926 | 360  | YYSSSIWGPTCDGLDRIVERC    |
| Q9C0B1 | 104  | VSRILIGNPGCTYKYLNTRLF    |
| Q9EP69 | 84   | VITKKMKVGE CFNHAVWRATD   |
| P09936 | 220  | GEVRFSAVALCKAAXXXXXXX    |
| P04350 | 239  | VSATMSGVTTCLRFPGQLNAD    |
| P49458 | 39   | LKYRHS DGNL CVKVTDDLVLCL |
| O08709 | 201  | PTLSEEEAKQCFPKGVTTEL     |
| P50462 | 58   | TVAHESEIYCKVCYGRRYGP     |
| P07310 | 146  | SIKGYTLPPHCSRGERRAVEK    |
| Q6ZWV3 | 49   | KKAKVDEFPLCGHMVSDEYEQ    |
| Q9QY76 | 41   | KLGNPTDRNVCFKVKTTVPRR    |
| P50570 | 27   | QDAFSSIGQSCHLDLPQIAVV    |
| P97379 | 73   | HKVLSLNFSECHTKIRHVDAH    |
| Q91XE4 | 175  | SVESISKNGICLEMGPQPQGV    |

---

---

|        |      |                         |
|--------|------|-------------------------|
| Q5XJY5 | 286  | MKIEEKITLTCGRDGGLQNM    |
| Q06203 | 339  | TPAALAYAGKCGLPYVEVLCK   |
| O88545 | 296  | MAYLGTITKTCNTMNQFVNKF   |
| Q01853 | 691  | GFSGADLTEICQRACKLAIRE   |
| Q9JIK5 | 450  | NPQTLLFSATCPHWVFNVAKK   |
| Q16543 | 308  | YESLPEELQKCFDVKDVQMLQ   |
| P36578 | 250  | LAPGGHVGRFCIWTESAFRKL   |
| Q9D7H3 | 28   | QILRVSTALSCLLGLPLRVQK   |
| Q01853 | 209  | NEVGYDDIGGCRKQLAQIKEM   |
| Q05586 | 744  | AVLEFEASQKCDLVTTGELFF   |
| P06151 | 84   | TPKIVSSKDYCVTANSKLVII   |
| Q9CZR8 | 63   | RRKTGYSFVNCCKALETCGGD   |
| Q62167 | 468  | EDFLYHEGYACTSIHGDRSQR   |
| P21980 | 370  | TPQEKSEGTYCCGPVPVRAIK   |
| Q9Z1Z0 | 303  | PTNPPGATSSCQKAMFQCGLL   |
| P14618 | 424  | VGAVEASFKCCSGAIIVLTKS   |
| O55222 | 422  | TIPPGISPHVCKLMKICMNED   |
| P62701 | 41   | PSTGPHKLRECLPLIIFLRNR   |
| P20618 | 82   | YKLTDKTVIGCSGFHGDCLTL   |
| Q01518 | 93   | ERALLVTASQCQQAENKLSD    |
| P43897 | 240  | VLGKYGALVICETSEQKTNLE   |
| P61978 | 185  | QTTIKLFQECCPHSTDRVLI    |
| Q8R5A6 | 150  | VKSVSESHTPCPSESTGDTVP   |
| Q9CPY7 | 445  | FEHYTRQVIDCQLADVNNL GK  |
| O70325 | 195  | EPQVIEKDLP CYLXXXXXXXX  |
| Q60854 | 102  | TANRLF GDKTCDLLASF KDSC |
| Q8R086 | 265  | PKHEVTVTLQCAGNRRSEMSK   |
| Q9JHW2 | 146  | DSFSTFDTPYCKVGLGICYDM   |
| Q3U5Q7 | 243  | ARAVLDLVDQCPKEVQKGKFO   |
| O55126 | 103  | PKIHEGKQYPC TLVGTWNTWY  |
| Q9QYB1 | 35   | AGSDGESIGNCPFSQRLFMIL   |
| Q60714 | 170  | VNLRREPLAFCLGTSAAKALI   |
| Q62234 | 1601 | NEKPLTSDDHCSLKFEAGKTA   |
| Q9D404 | 86   | VVGDEYKNIPCSVAAYVPRGP   |
| Q9Y6I9 | 68   | GETGRLFTESCSISPKLRSIA   |
| P47962 | 62   | IVRVTNRDII CQIAYARIEGD  |
| Q7TNG8 | 63   | QHGHD ESMHRCQPPDAVWPQ   |
| P54577 | 501  | LQADFKISEECIAQWKQTNFM   |
| Q96AG4 | 59   | NKLTTLPSDFCGLTHLVKLDL   |
| Q9CPP6 | 17   | KTTGLVGLAVCDTPHERLTIL   |
| Q9CPV4 | 182  | RALLGYADNQC KLELOGIQGA  |
| Q6P3A8 | 175  | YRYRSGDLFNCGSLTIRAPWG   |
| Q9JLV5 | 636  | ELVRALQSLACGKPTQRVLTK   |
| P52825 | 639  | SGRNAREFLHC VQKCLEDMFD  |
| Q921G7 | 247  | HAKVTVFAEGCHGHLAKQLYK   |
| Q9BW61 | 25   | NFSRFHADSVCKASNRRPSVY   |
| Q01433 | 230  | QRVTISGEEKCGVPFTDLLDA   |
| P05125 | 145  | DRIGAQSGLGCNSFRYRRXXX   |
| Q9DCB8 | 56   | GEGQIRLTDS CVQRLL EITEG |
| Q91VR2 | 103  | IIGVSSDRGLCGAIHSSVAKQ   |
| Q61024 | 207  | ASVEMVKYHHC TDEPLHAIYD  |
| P35486 | 181  | VPLGAGIALACKYNGKDEVCL   |

---



---

|        |      |             |              |
|--------|------|-------------|--------------|
| Q16658 | 397  | VFRGEHGFICR | KVTGTLDAN    |
| P97443 | 90   | KDAWLNHKNEC | AAIKKYGKVP   |
| Q9JI57 | 230  | ISLLPKGSRDC | GLHGQASKVA   |
| Q9DCS3 | 169  | QSAATLGVNPC | TAYRMLVDFE   |
| Q8BG93 | 75   | EEAGLHLKNVC | FASVVNSFVE   |
| Q7KZF4 | 440  | ETVPAFSERTC | ATVTIGGINI   |
| Q91YT0 | 425  | ISKQIEGHTIC | ALGDGAAWPV   |
| Q9CZ13 | 410  | VSHLDGTPVCE | DIGRSLTY     |
| P34932 | 38   | NEYSDRCTPAC | ISFGPKNRSI   |
| P23492 | 142  | IRDHINLPGFC | GQNPLRGPND   |
| Q9D0I9 | 86   | INSRLQEVFGC | AIRAAYPDLE   |
| Q8VCW8 | 467  | VPGELYIRGYC | VMOGYWGEPO   |
| Q9D892 | 33   | VIQILGDNFPC | TLEAQKIDLP   |
| P52503 | 79   | VNEVEHRIIAC | DGGGALGHP    |
| Q9UNM6 | 182  | YYKDALRFLGC | VDIKDLPVSE   |
| Q60676 | 77   | NRSLAYLRTEC | YGYALGDATR   |
| P68104 | 411  | IVDMVPGKPMC | VESFSDYPPL   |
| O00231 | 289  | YAGRQTEALKC | VQAASKNRSL   |
| P40926 | 285  | CSFVKSQETEC | TYFSTPLLLG   |
| Q91V92 | 20   | TGKELLYKYIC | TTSAIQNRFK   |
| P17563 | 268  | DPSATQGFVGC | ALSSNIQRFY   |
| Q8K0C8 | 92   | MEGKPEAKDEC | XXXXXXXXXX   |
| A2AVZ9 | 251  | HETKELRSKEC | LPPKEENSGP   |
| Q99LC5 | 68   | TKCDKVVQDLC | KVAGVAKVLV   |
| Q07417 | 151  | TPFTNGDKIGC | FALSEPGNGS   |
| O09131 | 191  | QRLEALELKEC | LAHTPKLKLW   |
| P17751 | 177  | ALAEGLGVIA  | CIGEKLDEREA  |
| Q9JHU4 | 631  | FKVQYPQSQAC | KMSHVRDLPP   |
| P05201 | 253  | YFVSEGFELFC | AQSFSKNFGL   |
| Q99KC8 | 279  | DIPEVEASKAC | GEFVFLMDRS   |
| Q9Z0N1 | 105  | SCPRPECYRSC | GSSTPDEFPT   |
| P54819 | 92   | LIEKNLETPLC | KNGFLLDGFP   |
| Q6PDY2 | 225  | IRPKEASGSAC | DLPREVWLE    |
| O95573 | 561  | FEDENGQRWLC | TGDIGEFEPD   |
| Q8CC88 | 1064 | QTGNGMQKVL  | CPAETNHVDIK  |
| Q8BTM8 | 2378 | VHSPSGALEEC | YVTEIDQDKY   |
| Q91WS0 | 72   | MEDLGDKAVYC | RWCWRSKKFPF  |
| Q14103 | 126  | YFSKFGEVVD  | CTLKLDPIITGR |
| O43765 | 153  | GAVQDCERAI  | CIDPAYSKAYG  |
| O55143 | 471  | GLSKIERANAC | NNSVIKQLMKK  |
| O08739 | 322  | KVDTHIHAAAC | MNQKHLRIFI   |
| P28482 | 65   | KISPFEHQTYC | QRTLREIKIL   |
| Q9JHR7 | 904  | LDKPKKLSAEC | AKYWGEIISQ   |
| P52272 | 114  | LMDAEGKSRGC | AVVEFKMEES   |
| P21980 | 277  | HGCQRVKYGC  | WVFAAVACTV   |
| P70195 | 74   | TEGMVVADKNC | SKIHFIISPNI  |
| Q8BVZ1 | 51   | VVALPLVKATC | TAVSSAYNSA   |
| Q5VYK3 | 1257 | GORTIAALLPC | LLDKGMMSTV   |
| Q3TBW2 | 180  | SVPFLPLLGGC | VDDTILSRQG   |
| Q61792 | 53   | NYKGYEKKPYC | NAHYPKQSFT   |
| P78527 | 795  | MOPYYKDILPC | LDGYLKTSAL   |
| P26039 | 1199 | AKAVTQALNRC | VSCLPGQRDV   |

---

---

|        |      |                        |
|--------|------|------------------------|
| Q8CHP8 | 217  | ENGRFIAGTGCLVRAVEMAAQ  |
| O15382 | 345  | VFGSGTACQVCPVHRILYKDR  |
| Q9CZ13 | 69   | VASEQSSHATCTVGVWIDAGS  |
| Q9JHW2 | 153  | TPYCKVGLGICYDMRFAELAQ  |
| Q9JLV1 | 185  | ERSQSPAASDCSSSSSSASLP  |
| Q92879 | 61   | RSQNPPQSKGCCFVTFYTRKA  |
| O95433 | 207  | ARPVGVKIPTCKITLKETFLT  |
| P26039 | 1661 | MRDKAPGQLECEATAIALNSC  |
| P16332 | 740  | AVQVLDDIEKCLAEKQOSVXX  |
| Q9DB20 | 141  | IMSVHRGEVPCVTTASPLDD   |
| P05089 | 168  | DVPGFVSWVTPCISAKDIVYIG |
| Q04750 | 632  | NRANRAVAILCNHQRAPPKTF  |
| Q8R3F5 | 118  | PQEDLDRTVHCQPAVVASLA   |
| P55263 | 160  | SLIANLAAANCYKKEKHLBLE  |
| P48962 | 57   | AEKQYKGIIDCVVRIPKEQGF  |
| Q9D1P0 | 53   | NKPVYHQLSDCGDHVVIINTR  |
| P14152 | 154  | APSIPKENFSCVLRDLHNRAK  |
| Q921H8 | 177  | RLLESEKARDCLTPMGMTSEN  |
| P58281 | 786  | MYWKNRTQEQCVHNETKNELE  |
| Q15274 | 96   | RVAEVRGPAHCLLLGERVALN  |
| Q9CR00 | 59   | GIGMNEPLVDCGYPRADVLD   |
| Q06587 | 398  | FWKVSRLPLELCYAPTKDPKXX |
| Q9CW46 | 222  | QLTPALLHSRCLCVDHLPPIGF |
| Q8JZQ2 | 625  | YTKEQLLDRMCMTLGGRVSEE  |
| Q8N0X7 | 504  | LVDGVCTVANCVGKELAPHVK  |
| P46459 | 264  | KGILLYGPPGCGKTLARQIG   |
| Q9Z2Z6 | 165  | CAKKLYQEFGCRGFYKGTVLT  |
| Q9D1Q6 | 92   | KNQVVFARVDCDQHS DIAQRY |
| P49327 | 1118 | EQQVPILEKFCFTPHTEEGCL  |
| Q8TAQ2 | 145  | NCLSRPNIFLCPPEIEPKLLGK |
| Q9Y3C8 | 116  | TAKMYRGGKICLTDHFKPLWA  |
| P70670 | 354  | KGSSAVTNELCSPPGSSNVAG  |
| P62984 | 115  | PRAVNCRKKKCGHTNNLRPKK  |
| O94979 | 60   | LSDPSLDMKSCATFSSSHRYH  |
| P05141 | 160  | AEREFRLGDCLVKIYKSDGI   |
| P14873 | 2460 | VVMQDESFPACKIELXXXXXX  |
| Q8BTM8 | 483  | TVGQACNPAAACRAIGRGLQPK |
| Q9UL62 | 558  | DEPNCKGIRCEKQNNAFSTL   |
| P50544 | 238  | SIRSSAIPSPCGKYITLNGSK  |
| P16675 | 438  | GEQVAGFVKECSHITFLTICK  |
| P41216 | 109  | RGIQVSNNGPCLGSRKPNQPY  |
| Q9UBF2 | 325  | AMKHPSAVTACNLDLENLITD  |
| P08397 | 114  | LPPGFTIGAI CKRENPHDAVV |
| Q91YR7 | 837  | KTKSVDALKKCEHDPHVLLAV  |
| O94927 | 349  | RQVLILGLRRCCLWTELKALH  |
| P30044 | 100  | FGVPGAFTPGCSKTHLPGFVE  |
| O70250 | 55   | IKDAKIEFDICYTSVLKRAIR  |
| P24452 | 77   | QOSSRDEQGACAVLAVHLNLT  |
| Q9D6S7 | 154  | ILVNMASFPECTAAAIKAIRE  |
| P98170 | 12   | TFNSFEGSKTVPADINKEEE   |
| P78527 | 478  | LAAGPVLRCISTVVHQGLI    |
| Q9NPH0 | 183  | TRCLLAGLFCQKEGPIIHT    |

---

---

|                 |      |                                 |
|-----------------|------|---------------------------------|
| Q75694          | 974  | AFQERLNSYK <b>C</b> ITDTLQELVN  |
| Q9BSK1          | 152  | KSQNLNDLQKI <b>C</b> AGGKPHECSV |
| Q01853          | 174  | KVVETDPSPY <b>C</b> IVAPDTVHC   |
| Q6PB66          | 847  | LPAALEASIA <b>C</b> HKKYKVLPRI  |
| Q8N0X7          | 499  | KVSQFLVDGV <b>C</b> TVANCVGKEL  |
| Q6R5N8          | 527  | KLQSLILSHN <b>C</b> LKILEPNSFS  |
| P97390          | 172  | LTALLLSLKK <b>C</b> PMIRYQLSSE  |
| Q9P1F3          | 39   | KFGVLFRRDK <b>C</b> ANLFEALVGT  |
| O08528          | 628  | KWTKGFKASG <b>C</b> EGEDVVTLK   |
| Q91VD9          | 554  | MLFLLGADGG <b>C</b> ITRQDLPKDC  |
| Q8BKC5          | 733  | AAESMPLLE <b>C</b> ARVRGPEYLT   |
| Q6PIE5          | 660  | SQVNPREAKA <b>C</b> VVHGSDLKDM  |
| P34932          | 245  | KFDEVLVNHF <b>C</b> EEFGKKYKLD  |
| Q62159          | 16   | KKLVIVGDG <b>C</b> GKTCLLIVFS   |
| P35486          | 273  | REATKFAAA <b>C</b> YCRSGKGPILME |
| Q61233          | 31   | VTDGNGYIS <b>C</b> NELNDLFKAA   |
| Q9R0H0          | 531  | VDLVRASEAH <b>C</b> HYVTVKVFAD  |
| P62983          | 149  | HYCGKCCLTY <b>C</b> FNKPEDKXXX  |
| P32020          | 495  | VLPNSDKKAD <b>C</b> TITMADSLL   |
| Q8 <b>C</b> I94 | 758  | SGFFSPKDPD <b>C</b> FKDVVNMLMY  |
| Q60770          | 558  | AYEVSQAHKS <b>C</b> EVIIGSTHIL  |
| Q8R1S0          | 116  | LSSFQAWDHI <b>C</b> NMRCKAFRRM  |
| Q04750          | 506  | EEGETADTVG <b>C</b> CSLRVEHINL  |
| Q08211          | 12   | GDVKNFLYAW <b>C</b> GKRKMTPSYE  |
| Q99JY9          | 408  | KDYEEIGPSI <b>C</b> RHNPVFGVMS  |
| P62888          | 92   | GTACGKYRV <b>C</b> TLAIDPGDS    |
| P16615          | 560  | EWGSGSDTLR <b>C</b> LALATHDNPL  |
| P61081          | 65   | DDLNFKLVI <b>C</b> PDEGFYKSGK   |
| O70325          | 134  | NVKFDMYSKI <b>C</b> VNGDDAHPLW  |
| Q7TPV4          | 1043 | KTLSARELRV <b>C</b> FEDPEWEQLI  |
| P51660          | 175  | SAAKLGILGL <b>C</b> NTLAIEGRKN  |
| Q7TNS2          | 58   | GVGLGMAYS <b>C</b> NQHDFQAPYLL  |
| Q9CQ07          | 239  | VQOEKETIAK <b>C</b> IEDLKLLAKK  |
| P13489          | 38   | QOCQVRLDD <b>C</b> GLTEARCKDI   |
| P52272          | 694  | IKMENGKSKG <b>C</b> GVVKFESPEV  |
| Q9JLV1          | 378  | EVKVSSAPI <b>C</b> PSPSPAPSAV   |
| P97443          | 417  | GHIEVGHGMI <b>C</b> KAYAILLVTH  |
| Q60597          | 507  | FHKDVVVDLV <b>C</b> YRRNGHNEMD  |
| O14744          | 22   | SRVSSGRDLN <b>C</b> VPEIADTLGA  |
| P01009          | 256  | KRLGMFNIQ <b>C</b> HKKLSSWVLLM  |
| Q61553          | 80   | LAADKDGNT <b>C</b> CEREVPDGDRC  |
| O55143          | 498  | SRDRKSMSVY <b>C</b> TPNKPSRTSM  |
| Q99JB8          | 231  | MEDMEQAFES <b>C</b> QAAERQRLLF  |
| Q9Y237          | 45   | GNAVKVRHIL <b>C</b> EKHGKIMEAM  |
| P12979          | 61   | EKGLGTPEH <b>C</b> PGQCLPWACK   |
| Q8K4Z3          | 277  | LNLPSYPT <b>C</b> TECVYRLQXXXXX |
| P98192          | 137  | KIFKQIFSKV <b>C</b> VNEEGIQKLQ  |
| Q9EQ09          | 863  | DPSVAKSMMA <b>C</b> LLSSLKANGS  |
| Q15366          | 109  | TLRLVVPASQ <b>C</b> GSLIGKGGCK  |
| P38646          | 608  | EFKDQLPADE <b>C</b> NKLKEEISKM  |
| Q8BVI4          | 82   | LGDQKVDAIL <b>C</b> VAGGWAGGNA  |
| Q9NR33          | 85   | VETIAKDAY <b>C</b> CAQQGKRKTLO  |

---

---

|        |      |                                                                                                                 |
|--------|------|-----------------------------------------------------------------------------------------------------------------|
| Q9CZ42 | 257  | LISNGQQVLV <b>C</b> NQEGSSRRCG                                                                                  |
| P09382 | 61   | NAHGDANTIV <b>C</b> NSKDGGAWGT                                                                                  |
| P84095 | 157  | KQIHAVRYLE <b>C</b> SALQODGVKE                                                                                  |
| P29474 | 802  | QYQPGDHIGV <b>C</b> PPNRPGLVEA                                                                                  |
| Q05816 | 120  | KLKDGKMIVE <b>C</b> VMNNATCTRV                                                                                  |
| Q791T5 | 222  | AHPLHVISM <b>R</b> CMVQFVGREAK                                                                                  |
| P50462 | 120  | FSAKFGESEK <b>C</b> PRCGKSVYAA                                                                                  |
| P40926 | 212  | GKTIIP <b>L</b> ISQ <b>C</b> TPKVDFPQDQ                                                                         |
| P50544 | 478  | ILRLFVALQ <b>G</b> CMDKGKELTGL                                                                                  |
| Q9DBB8 | 95   | LCLAAGKAVL <b>C</b> EKPMGVNAAE                                                                                  |
| Q9CQJ8 | 31   | KRALRHLE <b>S</b> W <b>C</b> IHRDKYRYFA                                                                         |
| P60900 | 154  | DEEQGPQVYK <b>C</b> DPAGYYCGFK                                                                                  |
| P60766 | 105  | EKWVPEITH <b>H</b> CPKTPFLLVGT                                                                                  |
| Q9UNE7 | 199  | DDSHVRAQ <b>Q</b> AC <b>I</b> EAKHDKYMA                                                                         |
| Q91YT0 | 187  | YEAGLIGK <b>N</b> AC <b>G</b> SDYDFDVFV                                                                         |
| P70310 | 153  | ARRLLTP <b>R</b> RT <b>C</b> RLLSLVWVAS                                                                         |
| Q9D273 | 179  | GGKSS <b>S</b> ALH <b>F</b> CRAVC <b>R</b> RAERR                                                                |
| O55091 | 38   | CVIDENAK <b>I</b> FC <b>I</b> RVTD <b>F</b> MDDP                                                                |
| P55036 | 37   | QAQ <b>Q</b> DAVN <b>I</b> VC <b>H</b> SKTRSNPEN                                                                |
| Q9Z2I8 | 256  | FGETPEGQ <b>V</b> VC <b>F</b> DAK <b>I</b> NFDDN                                                                |
| Q8BY71 | 24   | AVEK <b>K</b> LAEY <b>K</b> C <b>N</b> TNTA <b>I</b> ELKL                                                       |
| Q9D0I9 | 638  | LK <b>V</b> NMWR <b>M</b> LL <b>C</b> EAVA <b>A</b> VM <b>A</b> KG                                              |
| Q9BXP5 | 640  | YPNEDEMP <b>N</b> RC <b>G</b> I <b>I</b> HVR <b>G</b> PMP                                                       |
| P08249 | 275  | AMNGKEG <b>V</b> VE <b>C</b> SFVQ <b>S</b> K <b>E</b> TEC                                                       |
| O70370 | 329  | IRMARN <b>N</b> KN <b>H</b> CG <b>I</b> ASY <b>C</b> SYPE                                                       |
| Q80Y14 | 63   | FLKGTPE <b>Q</b> P <b>Q</b> CG <b>F</b> SNA <b>V</b> VQIL                                                       |
| Q9CY45 | 79   | DAAGEG <b>G</b> RI <b>A</b> CV <b>S</b> AP <b>S</b> VYQKL                                                       |
| P26638 | 300  | LPIKYAG <b>L</b> ST <b>C</b> FR <b>Q</b> EV <b>G</b> SHGR                                                       |
| P11142 | 603  | EHQ <b>Q</b> KELE <b>K</b> VC <b>N</b> PI <b>I</b> TK <b>L</b> YQS                                              |
| Q9CQ54 | 40   | RLV <b>Y</b> M <b>G</b> LL <b>G</b> Y <b>C</b> T <b>G</b> LMD <b>N</b> MLRM                                     |
| Q8QZT1 | 116  | LGAG <b>L</b> PI <b>S</b> TP <b>C</b> TT <b>V</b> N <b>K</b> VC <b>A</b> SG                                     |
| Q8BRK8 | 174  | MSDGE <b>F</b> L <b>R</b> TS <b>C</b> G <b>S</b> P <b>N</b> Y <b>A</b> APEV                                     |
| Q80X90 | 2057 | I <b>Q</b> TE <b>D</b> LE <b>D</b> GT <b>C</b> K <b>V</b> S <b>Y</b> F <b>P</b> TV <b>P</b> G                   |
| Q91WD7 | 143  | MY <b>L</b> T <b>M</b> LD <b>L</b> FK <b>C</b> I <b>D</b> E <b>I</b> K <b>E</b> E <b>K</b> EC                   |
| P68040 | 207  | TV <b>T</b> VS <b>P</b> D <b>G</b> SL <b>C</b> AS <b>G</b> G <b>K</b> D <b>G</b> Q <b>A</b> M                   |
| P20810 | 661  | IDAL <b>S</b> GD <b>L</b> DS <b>C</b> P <b>S</b> T <b>T</b> ETS <b>Q</b> NT                                     |
| Q9QZ06 | 229  | PP <b>P</b> AV <b>A</b> P <b>Q</b> PR <b>C</b> NE <b>E</b> D <b>L</b> K <b>A</b> I <b>Q</b> D                   |
| Q9CWJ9 | 101  | LDF <b>N</b> L <b>V</b> R <b>V</b> V <b>V</b> C <b>N</b> L <b>Y</b> PF <b>V</b> KT <b>V</b> A                   |
| Q6PIE5 | 702  | PO <b>Q</b> K <b>L</b> I <b>I</b> VE <b>G</b> C <b>Q</b> R <b>Q</b> G <b>A</b> I <b>V</b> AVT                   |
| P47915 | 117  | RS <b>Y</b> MA <b>K</b> Q <b>R</b> L <b>C</b> Q <b>P</b> K <b>P</b> K <b>V</b> Q <b>T</b> KA                    |
| Q9D8B4 | 95   | DD <b>P</b> L <b>N</b> Y <b>F</b> I <b>G</b> G <b>C</b> A <b>G</b> G <b>L</b> T <b>L</b> G <b>A</b> R <b>T</b>  |
| Q9D1C3 | 58   | F <b>H</b> P <b>A</b> LL <b>Q</b> FL <b>V</b> C <b>P</b> L <b>S</b> K <b>K</b> PL <b>R</b> Y <b>E</b>           |
| Q71RI9 | 417  | K <b>L</b> T <b>A</b> IP <b>V</b> S <b>A</b> F <b>C</b> D <b>S</b> K <b>S</b> K <b>P</b> H <b>F</b> E <b>K</b>  |
| P62869 | 60   | LL <b>D</b> D <b>G</b> K <b>T</b> L <b>G</b> E <b>C</b> G <b>F</b> T <b>S</b> Q <b>T</b> A <b>R</b> P <b>Q</b>  |
| P04075 | 73   | LL <b>T</b> AD <b>D</b> R <b>V</b> N <b>P</b> C <b>I</b> G <b>G</b> V <b>I</b> L <b>F</b> H <b>E</b> T          |
| Q16623 | 145  | N <b>A</b> T <b>Q</b> S <b>D</b> Y <b>R</b> E <b>R</b> C <b>K</b> G <b>R</b> I <b>Q</b> R <b>Q</b> L <b>E</b> I |
| P60710 | 272  | F <b>Q</b> PS <b>F</b> L <b>G</b> M <b>E</b> S <b>C</b> G <b>I</b> H <b>E</b> T <b>T</b> F <b>N</b> S <b>I</b>  |
| P62826 | 120  | R <b>V</b> C <b>E</b> N <b>I</b> P <b>I</b> V <b>L</b> C <b>G</b> N <b>K</b> V <b>D</b> I <b>K</b> D <b>R</b> K |
| Q9JIX8 | 1051 | A <b>F</b> W <b>I</b> D <b>K</b> I <b>K</b> S <b>H</b> C <b>F</b> V <b>T</b> Y <b>S</b> T <b>V</b> E <b>E</b> A |
| P45376 | 45   | A <b>I</b> D <b>L</b> G <b>Y</b> R <b>H</b> I <b>D</b> C <b>A</b> Q <b>V</b> Y <b>Q</b> N <b>E</b> K <b>E</b> V |
| Q8BUN5 | 121  | F <b>A</b> F <b>N</b> M <b>K</b> K <b>D</b> E <b>V</b> C <b>V</b> N <b>P</b> Y <b>H</b> Y <b>Q</b> R <b>V</b> E |
| Q99JX3 | 434  | P <b>T</b> T <b>V</b> E <b>D</b> R <b>V</b> S <b>D</b> C <b>T</b> P <b>A</b> V <b>E</b> K <b>P</b> V <b>S</b> D |

---

---

|        |      |                                          |
|--------|------|------------------------------------------|
| P31939 | 434  | AVKYTQSNSV <b>C</b> YAKNGQVIGI           |
| Q68FD5 | 1102 | LDRA YEFAER <b>C</b> NEPAVWSQLA          |
| Q810L3 | 341  | WMERSSLCPT <b>C</b> RCPVERICKN           |
| Q80X90 | 2289 | PVIAPSDDAR <b>C</b> LTVLSLQESG           |
| O75369 | 1326 | SPFKVAVTEG <b>C</b> QPSRVQAQGP           |
| P17987 | 147  | IVNTDELGRD <b>C</b> LINA AKTSMS          |
| Q921H8 | 381  | GAIALGHPLG <b>C</b> TGARQVV TLL          |
| Q02257 | 457  | DKDDITEPAV <b>C</b> ALRHLSRHP            |
| Q9WUM4 | 23   | VFGQAVKNDQ <b>C</b> YDDIRVSRVT           |
| Q8VEM8 | 86   | TAVVPLDLVK <b>C</b> RMQVDPQKYK           |
| Q8BGH2 | 403  | THFFLNAGNL <b>C</b> NLNYGEGPKA           |
| Q8VBT1 | 275  | EQQSERNMKL <b>C</b> QENTELAEKL           |
| A2A432 | 694  | KSMLSKLKHE <b>C</b> GAAFTSKLEG           |
| Q8QZT1 | 410  | KPGEFGLAS <b>I</b> CNGGGGASALL           |
| P50579 | 448  | LGIVDPYPPL <b>C</b> DIKGSYTAQF           |
| Q9D172 | 151  | LSTFAVDGKD <b>C</b> KVNKEVERVL           |
| Q6PEB6 | 134  | YTRHTLDGAA <b>C</b> LLNSNKYFPS           |
| P30999 | 429  | HPKKEVHLG <b>A</b> C <b>G</b> ALKNISFGR  |
| P97447 | 65   | HYKNRYWHDN <b>C</b> FRCAKCLHPL           |
| Q96AG4 | 131  | DPVLAKVAGD <b>C</b> LDEKQCKQCA           |
| P00750 | 118  | CQCPEGFAGK <b>C</b> CEIDTRATCY           |
| P21980 | 269  | DILRRWKNHG <b>C</b> QRVKYGCWV            |
| Q8BP47 | 125  | KNDPSLPEPA <b>C</b> VKISALEGYR           |
| Q12879 | 399  | VWPRYKSFSD <b>C</b> EPDDNHL SIV          |
| Q9CPV4 | 41   | VL RHEEFEEG <b>C</b> KAACNGPYDG          |
| P14152 | 137  | IVVGNPANTN <b>C</b> LTASKSAPSI           |
| Q99KI0 | 740  | KDFAPGKPLK <b>C</b> VIKHPNGTQE           |
| Q8QZT1 | 139  | AIMMASQSLM <b>C</b> GHQDVMVAGG           |
| Q9UQM7 | 6    | XXXXXMATIT <b>C</b> TRFTEEYQLF           |
| P11499 | 521  | VYMTEPIDEY <b>C</b> VQQLKEFDGK           |
| Q08752 | 282  | ALSCVLNIG <b>A</b> C <b>K</b> LKMSNWQGA  |
| P46777 | 76   | YARIEGDMIV <b>C</b> AAYAHEL PKY          |
| P31948 | 62   | GDYQKAYEDG <b>C</b> KTVDLKP DWG          |
| Q9D1H8 | 63   | ADVRHDGSEP <b>C</b> V DVLFGDGYR          |
| Q8BMS1 | 349  | LMGLYNGQVL <b>C</b> KKNKFGAPQK           |
| Q9ET26 | 161  | NFDQEGLVEH <b>C</b> KLTHSTDTKS           |
| P32067 | 18   | EKMTALEAKI <b>C</b> HQIEYYFGDF           |
| Q8WX93 | 964  | TANQEYKVSS <b>C</b> EQRLISEIEY           |
| Q99L45 | 224  | KTSFVNFTDI <b>C</b> KLLHRQPKHL           |
| Q9D1L9 | 66   | TSDPTDIPVV <b>C</b> LES DNGNIMI          |
| P55060 | 939  | AQSLHKLSTA <b>C</b> PGRVPSMVST           |
| P38060 | 307  | QKLEAGDFI <b>C</b> QALNRKTSSK            |
| Q8BTM8 | 1453 | HDVTDASKVK <b>C</b> SGPGLSPGMV           |
| Q8BIJ6 | 364  | FSGVDLEGGT <b>C</b> SHPLTPDKVS           |
| P05062 | 269  | RTVPAAVPGI <b>C</b> FLSGGMSEED           |
| P62983 | 145  | HFDRHYCGK <b>C</b> CLTYCFNKPED           |
| A3KMP2 | 363  | QEASKSPGEN <b>C</b> QHQLAKDVGL           |
| P47934 | 287  | NSIQKSIFTV <b>C</b> LDKQVPRVSD           |
| P62826 | 112  | PNWHRDLVRV <b>C</b> ENIPIVLCGN           |
| Q9R1P4 | 92   | RLLCNFMRO <b>E</b> C <b>L</b> DSRFVFD RP |
| Q3UHX9 | 140  | FRGVGKKGQ <b>A</b> C <b>V</b> QLARILQYL  |
| P35282 | 27   | SFKVVLLGEG <b>C</b> VGKTSVLRY            |

---

---

|        |      |                        |
|--------|------|------------------------|
| P62761 | 187  | SDPSIVLLLLQCDIQKXXXXXX |
| P62908 | 134  | RFIMESGAKGCEVVVSGKLRG  |
| P51410 | 135  | RVRMRTGVACCVSQAQKDELI  |
| Q61598 | 414  | YDATTHFETTCD DIKDIYKRM |
| Q99NB1 | 235  | KKIVDEAVKS CPTVQHVLVAH |
| Q76KJ5 | 107  | SSSEAGGRLT CAPAPSGSLRI |
| P47738 | 68   | TVNPSTGEVICQVAEGNKEDV  |
| Q9WVA4 | 63   | QKWLKDGTVLC KLINSLYPEG |
| Q3UH68 | 929  | QLEAEAGAPHC GTNPQPAQDP |
| Q60973 | 166  | HPAKPDPSGECNPDRLRLRGHQ |
| P00533 | 311  | VTDHGSCVRA CGADSYEMEED |
| P31943 | 34   | ADEVQRFFSDCKIQNGAQGIR  |
| P61971 | 80   | AQDHQPTPDS CIISMVVGQLK |
| Q9DCC4 | 49   | LASAPTDNNL CHFRALGCQTT |
| Q12931 | 501  | RAGTRNIYYL CAPNRHLAEHS |
| P10242 | 130  | KHLKGRIGKQCRERWHNHLNP  |
| Q9CQ75 | 58   | HPNLPILIRE CSEVQPKLWAR |
| Q9DCN1 | 177  | ESSQQPEVRLCQLNYPDVKGY  |
| Q9DBM2 | 17   | LPHSLAMIRLCNPPVNAISPT  |
| P61978 | 184  | TQTTIKLFQEC CPHSTDRVVL |
| Q8K4Z3 | 152  | KPLFTGLVTQCQKMDIPFLGE  |
| Q8C0M9 | 219  | KMVGRVGDSPCIGAGGYADNN  |
| P08113 | 138  | GNEELTVKIKCDKEKNLLHVT  |
| P68104 | 234  | SGTTLLEALDCILPPTRPDK   |
| Q3TL44 | 644  | HNRAVLAQLGCP IKNLDALEN |
| Q9D7P6 | 70   | VGTGLVGAPACGDVMKLQIQV  |
| Q99J39 | 359  | GRNELFTDSECQEISAVTGNP  |
| P09671 | 164  | KEQGRLQIAACSNQDPLQGT   |
| Q8C1E7 | 47   | LEELTKLQANCTNSITRQKKR  |
| P80313 | 310  | TQYFADRDMFCAGRVPEEDLK  |
| P60766 | 6    | XXXXXMQTIKCVVVG DGAVGK |
| Q8VEK3 | 583  | AGFQRKAVVVC PKDEDYKQRT |
| P78527 | 3187 | NIWDDIITNRCFFLSKIEEKL  |
| P17426 | 941  | IIQTKALQVGC LLRLEPNAQA |
| Q15149 | 3299 | VPLDVACARGCLDEETS RALS |
| Q2TPA8 | 11   | MLPNTGKLAGCTVFITGASRG  |
| Q9D7I5 | 226  | IVGDVGAQQCGMRALQVRTG   |
| Q8BWY3 | 127  | FKPINTSLYLCDNKFHTEALT  |
| Q8BZF8 | 106  | NGILSTPAVSCIIRKIKAAAG  |
| Q9DAW6 | 224  | HKSLRSLNFC SQIGDDRPI S |
| Q9Z0N1 | 269  | IRSFVKNKPGCEVDDLKGGVA  |
| Q9D0I9 | 502  | KAAQTSVAYGCIKYADLSHNR  |
| Q8VBT1 | 36   | NGPGKQDGERCSTSGOAPEQE  |
| Q8BIG7 | 88   | EQPQGDSMMTCEQAQLLANLA  |
| P14866 | 452  | NFMFGQKLVNVCVSKQPAIMPG |
| P62280 | 131  | QIGDIVTVGECRPLSKTVRFN  |
| Q9CQN1 | 135  | ALEKLRHKLVCEGQVLPEME I |
| Q9DCS3 | 263  | DLPLPRLALNCVGGKSSTELL  |
| Q9DB29 | 47   | SLLADRLVRKCDVLRNRFSGY  |
| Q64514 | 209  | VWHDGETWRACVDSNENGDLS  |
| P54886 | 612  | RDSKCEYPAA CNALETLLIHR |
| Q8BGH2 | 237  | KWEGVWRELGC LSRTASFAVR |

---

---

|        |      |                                                                                                     |
|--------|------|-----------------------------------------------------------------------------------------------------|
| P49368 | 173  | KAISRWSSLA <b>C</b> NIALDAVKMV                                                                      |
| Q924D0 | 236  | KAWGAHVTA <b>V</b> CSKDASELVRK                                                                      |
| P49411 | 290  | ERGILKKGDE <b>C</b> ELLGHSKNIR                                                                      |
| Q9DCM2 | 176  | NKLIENTDA <b>A</b> CKYGAFGLPTT                                                                      |
| P07900 | 598  | VSNRLVTSP <b>C</b> CIVTSTYGWTA                                                                      |
| Q9ER35 | 130  | KSKTRQNT <b>V</b> GCGAEGAEPQGV                                                                      |
| Q923E4 | 387  | GDIFNQVV <b>P</b> R <b>C</b> PRCPADEPLA                                                             |
| Q99J39 | 205  | NLERVTWH <b>S</b> P <b>C</b> EVLQKISECE                                                             |
| Q99N94 | 167  | GEATVKFL <b>R</b> S <b>C</b> HLEVGMKNNV                                                             |
| P17812 | 362  | VRYHEAW <b>Q</b> KL <b>C</b> SAHGVLVPGG                                                             |
| P14618 | 152  | ITLDNAY <b>M</b> EK <b>C</b> DENILWLDYK                                                             |
| P29474 | 1050 | TPMTLV <b>F</b> G <b>C</b> RC <b>S</b> QLDHLYRDE                                                    |
| Q8CC88 | 161  | RAGTAFY <b>I</b> D <b>Q</b> CAVRAATEGRT                                                             |
| P16125 | 36   | VVG <b>V</b> G <b>Q</b> VG <b>M</b> CA <b>I</b> SILGKSLA                                            |
| Q9CQ60 | 236  | AL <b>V</b> Q <b>P</b> RT <b>G</b> AL <b>C</b> WFLDEAAARL                                           |
| Q86VP6 | 1134 | FL <b>M</b> L <b>V</b> RL <b>S</b> T <b>L</b> <b>C</b> PSAVLQRLDR                                   |
| Q8BKZ9 | 307  | TV <b>P</b> HAYAT <b>A</b> D <b>C</b> DLGAVLKVRR                                                    |
| Q14181 | 198  | AG <b>N</b> ISL <b>K</b> VL <b>G</b> <b>C</b> PEALTGSYKS                                            |
| P22460 | 346  | TF <b>E</b> LL <b>V</b> RF <b>F</b> AC <b>P</b> SKAGFSRNI                                           |
| P14550 | 134  | PF <b>P</b> KN <b>A</b> D <b>G</b> TI <b>C</b> YDSTHYKETW                                           |
| Q9Z1Z2 | 305  | V <b>V</b> G <b>K</b> TY <b>G</b> L <b>W</b> K <b>C</b> VLPEEDSGEL                                  |
| P04075 | 339  | V <b>K</b> RALAN <b>S</b> L <b>A</b> <b>C</b> Q <b>G</b> KYTPSGQA                                   |
| Q99MK8 | 340  | H <b>V</b> RISDL <b>G</b> L <b>A</b> <b>C</b> DFSKKRPHAS                                            |
| O70325 | 175  | FT <b>K</b> FLID <b>K</b> NG <b>C</b> VVKRYGPMEE                                                    |
| Q9D1G3 | 347  | HF <b>D</b> RGIND <b>W</b> L <b>C</b> KYVYDHIGGD                                                    |
| P52825 | 84   | DS <b>Q</b> FR <b>K</b> TE <b>V</b> L <b>C</b> KDFENGIGKE                                           |
| Q15149 | 3295 | K <b>S</b> HRV <b>P</b> L <b>D</b> V <b>A</b> <b>C</b> ARGCLDEETS                                   |
| P17563 | 371  | V <b>Q</b> VLE <b>D</b> Q <b>E</b> L <b>T</b> <b>C</b> QPEPLVVKGK                                   |
| O00170 | 240  | IT <b>P</b> LLL <b>N</b> Y <b>C</b> Q <b>C</b> KL <b>V</b> VEEY <b>Y</b> EV                         |
| P28651 | 201  | Q <b>Y</b> K <b>G</b> KS <b>K</b> T <b>I</b> P <b>C</b> FNPNTLLPDP                                  |
| Q8BTM8 | 2601 | L <b>V</b> G <b>V</b> H <b>G</b> PR <b>T</b> P <b>C</b> EEILVKHMGS                                  |
| P09528 | 131  | L <b>A</b> T <b>D</b> K <b>N</b> D <b>P</b> H <b>L</b> <b>C</b> DFIETY <b>Y</b> LSE                 |
| Q791T5 | 206  | K <b>E</b> T <b>S</b> Y <b>E</b> M <b>M</b> Q <b>C</b> VSRMLAHPLH                                   |
| Q12879 | 87   | T <b>D</b> PK <b>S</b> L <b>I</b> T <b>H</b> V <b>C</b> DLMSGARIHG                                  |
| P21283 | 376  | Y <b>Y</b> P <b>Y</b> V <b>Y</b> Y <b>K</b> I <b>D</b> <b>C</b> NLLE <b>F</b> K <b>X</b> X <b>X</b> |
| Q15233 | 145  | R <b>G</b> K <b>Q</b> L <b>R</b> VR <b>F</b> A <b>C</b> HSASLTVRNL                                  |
| Q62418 | 127  | A <b>R</b> A <b>E</b> E <b>D</b> VE <b>P</b> E <b>C</b> IMEKVAKASG                                  |
| P37804 | 38   | ER <b>L</b> VE <b>W</b> I <b>V</b> V <b>Q</b> <b>C</b> GPDVGRPDRG                                   |
| Q64702 | 4    | X <b>X</b> X <b>X</b> X <b>X</b> MA <b>A</b> <b>C</b> IGERIEDFKV                                    |
| Q7TQ48 | 648  | Q <b>E</b> R <b>G</b> Y <b>P</b> F <b>N</b> D <b>V</b> <b>C</b> QWFIDRADLI                          |
| P09211 | 48   | T <b>W</b> Q <b>E</b> GS <b>L</b> K <b>A</b> S <b>C</b> LYGQLPKFQD                                  |
| Q64514 | 150  | PI <b>H</b> R <b>V</b> AL <b>A</b> E <b>A</b> <b>C</b> RKQEEFDIAN                                   |
| Q91Z53 | 288  | P <b>S</b> H <b>P</b> LL <b>T</b> L <b>K</b> N <b>C</b> VILPHIGSAT                                  |
| Q9EQQ9 | 596  | RAN <b>S</b> S <b>V</b> V <b>S</b> V <b>N</b> <b>C</b> KGKDSEKIEE                                   |
| Q8BFP9 | 71   | Q <b>F</b> L <b>D</b> FG <b>S</b> V <b>N</b> A <b>C</b> EKTSFMFLRQ                                  |
| Q9Z0S1 | 59   | K <b>A</b> D <b>R</b> L <b>V</b> Q <b>M</b> S <b>I</b> <b>C</b> SSLARKFPKL                          |
| Q9DBG3 | 857  | EN <b>E</b> L <b>Q</b> F <b>Q</b> I <b>K</b> E <b>C</b> HNLNADTVSSK                                 |
| Q8K2B3 | 89   | GL <b>S</b> E <b>A</b> G <b>F</b> NT <b>A</b> CLTKLFPTRSH                                           |
| P05063 | 135  | T <b>Q</b> GLD <b>G</b> LL <b>E</b> R <b>C</b> AQYKKDGADF                                           |
| Q64337 | 145  | V <b>V</b> G <b>T</b> RY <b>K</b> CS <b>V</b> <b>C</b> PDYDLCSVCE                                   |
| Q4G0N4 | 393  | NR <b>V</b> F <b>S</b> SR <b>Q</b> R <b>C</b> FSSKVCVRSR                                            |
| Q60714 | 406  | I <b>A</b> N <b>M</b> D <b>G</b> K <b>V</b> G <b>S</b> <b>C</b> GFNSRILTHV                          |

---

---

|        |      |                                 |
|--------|------|---------------------------------|
| P52480 | 165  | NILWLDYKNI <b>C</b> KVVEVGSKIY  |
| O08528 | 606  | LPLGFTFSFP <b>C</b> QONSLDQSIL  |
| Q09161 | 73   | NYKSKILRLL <b>C</b> TVARLLPEKL  |
| Q9WU78 | 40   | PSGGEEQAQY <b>C</b> RAAEELSKLR  |
| P18760 | 139  | TGIKHELQAN <b>C</b> YEEVKDRCTL  |
| P14780 | 99   | ATLKAMRTPR <b>C</b> GV PDLGRFQT |
| Q8NC51 | 11   | MPGHLQEGFG <b>C</b> VVTNRFDQLF  |
| Q8CHT0 | 279  | GDTVTSSEHL <b>C</b> GINFTGSVPT  |
| O00170 | 238  | QQITPLLLNY <b>C</b> QCKLVVEEYY  |
| Q8QZR5 | 29   | KVLTLDTMNP <b>C</b> VRRVEYAVRG  |
| Q15149 | 1098 | RLMAEREYGS <b>C</b> SHHYQQLLOS  |
| Q8R349 | 133  | MSQSSIKSSI <b>C</b> LLRGKIYDAL  |
| O70251 | 161  | DEDTMTKLEE <b>C</b> VRSIQADGLV  |
| Q8CEI1 | 62   | AIQVTDISGG <b>C</b> GAMYEIKIES  |
| P35579 | 91   | SKVEDMAELT <b>C</b> LNEASVLHNL  |
| P30042 | 177  | HQAGKPIGL <b>C</b> CIAPVLAAKVL  |
| Q9DBF1 | 478  | FRWLGPKGSD <b>C</b> GIVNVNIPTS  |
| O88587 | 200  | YLPDTLLLEE <b>C</b> GLLRKGTVLL  |
| O55143 | 364  | GTLTTNQMSV <b>C</b> RMFILDKVEG  |
| Q99KB8 | 220  | GRLPPDTKVY <b>C</b> GHEYTVNNLK  |
| Q9Y2Z0 | 88   | NSTAMLRKGI <b>C</b> EYHEKNYAAA  |
| O43765 | 148  | LGNYAGAVQD <b>C</b> ERAICIDPAY  |
| A8C756 | 1910 | RTLAVLRLLA <b>C</b> LEGKEGLRAE  |
| Q9D6N1 | 232  | QQLARFRSLL <b>C</b> TAEGESAAFL  |
| P61161 | 11   | MDSQGRKVVV <b>C</b> DNGTG FVKCG |
| P21980 | 27   | NGRDHHTADL <b>C</b> REKLVVRRGQ  |
| P61922 | 440  | ISRVRGRGTF <b>C</b> SFDPDEAIR   |
| P05089 | 303  | VNTAVAITLA <b>C</b> FGLAREGNHK  |
| P04350 | 12   | REIVHLOAGQ <b>C</b> GNQIGAKFWE  |
| Q9DCL9 | 281  | LMGSTSDLGH <b>C</b> EKIKKACGNF  |
| P53702 | 70   | HQDRAYDYVE <b>C</b> PV TGARAKDK |
| Q8BIF0 | 212  | VKGENLEAVV <b>C</b> EEPQVTYSKQ  |
| P30042 | 176  | FHQAGKPIGL <b>C</b> CIAPVLAAKV  |
| O08528 | 517  | APVKMLPTYV <b>C</b> ATPDGTEKGD  |
| Q8JZN5 | 275  | DKLGIRGSNT <b>C</b> EVHFENTRVP  |
| Q02566 | 37   | QTRPFDIRTE <b>C</b> FVPDDKEEYV  |
| Q9QYG0 | 78   | YHDVGLNYKS <b>C</b> FQPLFRFGDM  |
| Q9R1P4 | 85   | AGLTADARLL <b>C</b> NFMROECLDS  |
| Q8BGK2 | 206  | LKVLPLAEY <b>C</b> CRKTIRHMAEY  |
| P49327 | 642  | QRCPPGVVPA <b>C</b> HNSKDTV TIS |
| P29474 | 661  | GLGSRAYPHF <b>C</b> AFARAVDTRL  |
| Q9QYC0 | 525  | KTAGPOSQVL <b>C</b> GVMMDRSLVQ  |
| P61247 | 139  | TTDGYLLRRL <b>C</b> VGFTKKRNNQ  |
| Q8BVI4 | 101  | NAKSKSLFK <b>C</b> NCDMMWKQSMWT |
| P07356 | 262  | LENAFLNLVQ <b>C</b> IQNKPLYFAD  |
| Q64520 | 98   | VRAVQAMNRI <b>C</b> VLDVDLQGVR  |
| Q8BH86 | 54   | RSLAPAFESF <b>C</b> QGNRGPLPLL  |
| Q60930 | 104  | GTEIAIEDQI <b>C</b> QGLKLTFDTT  |
| P46777 | 100  | VGLTNYAAAY <b>C</b> TGLLLARRLL  |
| Q8CIB5 | 426  | TPAHQLNLRG <b>C</b> EVTPDVNISG  |
| P41091 | 236  | AQLKYNIEVV <b>C</b> EYIVKKIPVP  |
| Q9CZU6 | 359  | VLRKTDPRYS <b>C</b> QREFALKHLP  |

---



---

|        |      |                         |
|--------|------|-------------------------|
| Q9CPR5 | 8    | XXXMAGTARGCGTSLDLLRSL   |
| Q78PY7 | 152  | NNPEQNRLSECEEQAKASKKG   |
| P17987 | 397  | EMERSLHDALCVVKRVLESKS   |
| P09411 | 367  | DEVVKATSRGCITIIIGGDTA   |
| Q921G7 | 386  | LTFPGLLIGCSPGFMNVPKI    |
| Q9CQ92 | 41   | SKSTQFEYAWCLVRSKYNEDI   |
| Q01320 | 404  | SEKFIKAAIGCGIVESILNWV   |
| P26639 | 107  | SWKTTPYQIACGISQGLADNT   |
| Q61553 | 341  | NASCYFDIEWCDRRITLRASN   |
| P14854 | 54   | MTAKGGDISVCEWYQRVYQSL   |
| P13639 | 591  | ETVSEESNVLCLSKSPNKHNR   |
| Q80UJ7 | 858  | SLKAKFGTEKCEHEEEKEGLE   |
| P62736 | 259  | VITIGNERFRCPETLFQPSFI   |
| O08749 | 484  | GASCEDIARVCHAHPTLSEAF   |
| Q9ET80 | 29   | EKGKAHGHGICTGPKGQGEYS   |
| Q8VBZ3 | 645  | STVPKATSGACTASQPQEAPP   |
| P15880 | 229  | IDDCYTSARGCTATLGNFAKA   |
| Q91VD9 | 75   | YHERLSVAGNCRMCLVEIEKA   |
| Q9JLJ2 | 45   | ATGRVIATFACSGEKEVNLA    |
| Q9D0M3 | 219  | DYVFSLLTGYCEPPTGVSLRE   |
| P23368 | 441  | EEAYTLTEGRCLFASGSPFGP   |
| A3KMP2 | 425  | NQLLIHAAMTCTSSVHKNVAR   |
| Q9D6M3 | 271  | NEDTYSGFLDCAKIIWRHEGP   |
| Q3UMB9 | 936  | IRMIRSGGLHCSSNAIRFVPD   |
| Q9Z0N1 | 434  | LGKIVLTNPVCTEVGEKIALS   |
| Q921G7 | 100  | AAEQKDIRVCLVEKAAQIGA    |
| Q99MK8 | 619  | VEETQIKERKCLLLKIRGGKQ   |
| Q9UI30 | 33   | LRLQATEVRI CPVEFNPNFVA  |
| Q9R0H0 | 392  | TWTANAGIEECRMACGGHGYS   |
| Q99K43 | 184  | FVNIKKQIILCMEELEHSPDT   |
| Q9CPY7 | 335  | PINIIGLAPL CENMPSGKANK  |
| P26443 | 172  | KALASLMTYKCAVVDVPFGGA   |
| O15355 | 13   | AYLSQPNTVKCSGDGVGAPRL   |
| P49721 | 91   | ANFTRRNLADCLRSRTPYHVN   |
| Q6P2B1 | 125  | LALQMPSWKGCVQTLVEKYSN   |
| Q29RF7 | 1084 | KLYTVCDVALCVINSKALCN    |
| P97447 | 255  | WHDYCFHCKKCSVNLANKRFV   |
| Q9DCM0 | 189  | HEKIFTLPGNCLIYPADYHG    |
| Q8BGH2 | 65   | LGRTKDDIIICEIGEVFKAKN   |
| P13010 | 346  | EGKCFSVLGFCKSSQVQRRFF   |
| Q8BMF4 | 613  | VASVMSVTLSCDHRVVDGAVG   |
| P22314 | 234  | VTKDNPVVTCLDEARHGFES    |
| Q8VDK1 | 63   | TPNKQENFKTCAELVQEAARL   |
| O00231 | 202  | SARTTANAIYCPPKLQATLDM   |
| Q9D0T1 | 102  | ACGVS RPVIA CSVTIKEGSOL |
| Q07417 | 289  | ALGIAQASLDCAVKYAENRNA   |
| Q9CPU0 | 139  | GIAVPDVYSACKRFEELGVKF   |
| Q2TPA8 | 71   | IEAAGGTALPCVVVDVRDEQQI  |
| O15382 | 342  | VREVFSGGTACQVCPVHRILY   |
| Q99700 | 301  | EGVFKTYSPKCDLVLDAHEK    |
| P30681 | 23   | MSSYAFFVQTCREEHKKKHPD   |
| P10605 | 93   | TFDAREQWSNCP TIGQIRDQG  |

---

---

|        |      |             |               |
|--------|------|-------------|---------------|
| Q9D7I5 | 53   | LKQSPLKVRFC | TNESQKSLRE    |
| P04350 | 303  | MFDAKNMMAAC | DPRHGRYLTV    |
| Q16543 | 336  | PTDAKYHMQR  | CIDSGLWVPNS   |
| Q08J23 | 93   | YKSHAKEILH  | CLKNKYFKELE   |
| P50544 | 434  | SEAAWKVADE  | CIQIMGGMGFM   |
| P20337 | 184  | QAFERLVDAI  | CDKMSDSLTD    |
| Q6ZWY3 | 77   | TGGKARLTEG  | CSFRRKQHXXX   |
| Q9DCT8 | 126  | VTTFTGEPNM  | CPRCNKRIFYFA  |
| P06213 | 1272 | PERVTDLMRM  | CWQFNPKMRPT   |
| P00533 | 329  | EEDGVRKCKK  | CEGPCRKVCNG   |
| Q99KI0 | 410  | AKQALAHGLK  | CKSQFTITPGS   |
| O55234 | 161  | GMGLSMGTMI  | CGWDKRGPGLY   |
| Q9R0Q7 | 58   | KHLNEIDLFC  | IDPNDSKHKR    |
| Q8BWT1 | 287  | ARVVGYPVSG  | CDPTIMGIGPV   |
| Q80X90 | 1280 | ITNPSGASTE  | CFVKDNADGTY   |
| P48643 | 181  | TTLGSKVVNS  | CHRQMAEIAVN   |
| Q71RI9 | 432  | KPHFEKLVRF  | CFIKKDSTLDA   |
| P62821 | 26   | LIGDSGVGKS  | CLLLRFADDTY   |
| P36578 | 96   | RSGQAFGNM   | CRGGRMFAPTK   |
| P15626 | 87   | LRYLARKHNL  | CGETEEERIRV   |
| P41250 | 466  | IEIVGCADR   | SCYDLSCHARAT  |
| Q9EQK5 | 59   | RMVTVPPRHY  | CIVANPVS RDA  |
| P61202 | 179  | QKILRQLHQ   | SCQTDDGEDDLK  |
| P08752 | 140  | RLWADHGVQA  | CFGRSREYQLN   |
| Q8BTM8 | 1018 | IVSPSGAAVP  | CKVEPGLGADN   |
| Q9EPL8 | 757  | LQCKGRGIDQ  | CIPLFVEAALE   |
| Q5XJY5 | 479  | QVSFISKKNY  | CNIQVTKVTQV   |
| P63167 | 56   | FDKKYNPTWH  | CIVGRNFGSYV   |
| Q8QZZ7 | 167  | RIGTLLDAI   | ICRMSTKDV LXX |
| Q8VEK3 | 449  | EKPYFPIPED  | CTFIQNVPLED   |
| P97807 | 330  | ELSGAMNTAA  | C SLMKIANDIR  |
| P29474 | 1048 | QPTPMTLVFG  | CRCSQLDHLYR   |
| O95219 | 172  | LLRIASHPIL  | CRDKIFYLFLT   |
| Q8R164 | 206  | LYGYDYLAKT  | CEWVDG ISQF   |
| P62070 | 183  | RVIRKFQEQE  | CPPSPEPTRKE   |
| P52825 | 643  | AREFLHCVQK  | CLEDMF DALEG  |
| Q9WVJ2 | 357  | KGMKDRLELW  | CTDVKSMEMLV   |
| P99029 | 200  | NVEPDGTGLT  | C SLAPNILSQL  |
| Q05519 | 79   | DSPLPVSSRV  | CFVKFHDPDSA   |
| Q61553 | 260  | KDELFALEQS  | CAQVVLQAANE   |
| P63330 | 196  | LQEVPHGPM   | CDLLWSDPDDR   |
| P18031 | 32   | DIRHEASDFP  | CRVAKLPKNKN   |
| P21333 | 444  | LEARGDSTYR  | CSYQPTMEGVH   |
| Q9CZY3 | 71   | ENRIYSLKIE  | CGPKYPEAPPS   |
| Q924X2 | 155  | TSHATKIWAI  | CVRLLSRRPM    |
| P21817 | 810  | KFLPPPQYAP  | CHEAVLPRERL   |
| P61759 | 8    | XXXMAAAKDG  | C GLETAAGNGR  |
| P70670 | 1763 | DSHISPVSDA  | CSTGTTTPQAS   |
| Q64277 | 123  | GENTRRLVAL  | CDVLYGKVGDF   |
| P70388 | 206  | RQTQGQKVKE  | CQTELKYLKQON  |
| Q91YT0 | 125  | VNADEGEPGT  | CKDREIMRHDP   |
| O55143 | 635  | GDNKGTAVAI  | CRRIGIFGQDE   |

---

---

|        |      |                        |
|--------|------|------------------------|
| Q924X2 | 526  | QRLPWDIPEQCREAIENSYQV  |
| P56380 | 124  | YRWLGLEEACCLAQFKEMKAT  |
| P43243 | 806  | IPKTGFYCKLCSLFYTNEEVA  |
| Q3UKJ7 | 312  | FERAHSKGVTCLSFSKDSSQI  |
| Q60714 | 80   | RHRRAGDTIPCIFQAVARRQP  |
| Q8QZT1 | 193  | DVYNKIHMGNCAENTAKKMNI  |
| Q8C025 | 386  | HLHLNIFKTSQQAPEQVYKH   |
| Q71FD7 | 35   | AVSEEVGQAACEARRARPWEM  |
| Q8VC70 | 190  | GFARMESTEKCEAIITHFNGK  |
| Q6A0A9 | 917  | AFRVTAASGHCGAFSGSDSSR  |
| Q60631 | 198  | NSDPNWWKGACHGQTMFPRN   |
| Q7TPV4 | 676  | QVVRVFGHICPHLTPRCLQL   |
| Q00610 | 736  | DVHFKEYIQAACTGQIKEVER  |
| Q99NB1 | 86   | WDTPYHTVWDCDFRTGKIGWF  |
| Q5SW19 | 1198 | KTKESSEYKCLTQQAVALQR   |
| Q80XN0 | 209  | RMANPARSPYCITKFGIEAFS  |
| Q8BGH2 | 421  | PKAHIRKLAECIRWSYGAGVV  |
| Q9JLV1 | 154  | MTEAAQTDKQCGQMPATATTA  |
| P27348 | 25   | QAERYDDMATCMKAVTEQGAE  |
| Q9DB26 | 49   | IVAEMDVPLHCRTEFSTQEDE  |
| P54729 | 399  | AQEARLGLRACDGNVDHAATH  |
| P97429 | 198  | TDEVKFLSILCSRNRNHLHVV  |
| Q9DCW4 | 131  | FLGKQAIDDDCNQGTGQMTAGL |
| P46782 | 172  | AFRNIKTIAECLADELINAAK  |
| O55222 | 239  | TRKSRDFNEECPRLRIFSHPN  |
| Q9DCA2 | 109  | ATNASLARASCGTEGFRNAKK  |
| P62245 | 30   | RGKRQVLIRPCSKVIVRFLTV  |
| P29474 | 94   | LSAQAQODGPCTPRRCLGSLV  |
| Q9Z2I9 | 430  | IADSGLKILACDDLDEAAKMV  |
| P62495 | 335  | NLDIMRYVLHCQGTEEEKILY  |
| Q921F2 | 173  | SQRHMIDGRWCDCCLPNSKQS  |
| Q9Y536 | 62   | CFHRIIPGFMCOGGDFTRHNG  |
| Q8CI94 | 373  | DKAWEITKKTCAAYTNHTVLPE |
| Q3UZY0 | 566  | HHSGLLRRAFCIWKESTQGFR  |
| Q9WUM4 | 456  | KEIKSIKETICSQDERISKLE  |
| P69905 | 105  | DPVNFKLLSHCLLVTLAAHLP  |
| Q8C7H1 | 181  | LSVLAVDPSSCTSGGSLLGDK  |
| P49327 | 1127 | FCFTPHTTEEGCLSERAALQEE |
| O14980 | 528  | VTVIKDLLGLCEQKRGKDNKA  |
| O08600 | 110  | RLRGDGDRSACDFREDDSVHA  |
| P40124 | 415  | PTISINKTDGCHAYLSKNSLD  |
| Q8BZF8 | 124  | AGGIILTASHCPGGPGGEFGV  |
| Q9QUM9 | 78   | HLFKITESIGVMTGMTADSR   |
| Q9WUM4 | 39   | VSRVTWDSFCAVNPRFVAII   |
| P20810 | 408  | AAPAPVSEAVCRTSMCSIQSA  |
| P05976 | 181  | LMAGQEDSNGCINYEAFVKHI  |
| P46459 | 21   | CPTDELSLTNCAVVNEKDFQS  |
| P14131 | 25   | RKKTATAVAHCKRGNGLIKVN  |
| O70145 | 291  | MFNGQKGLVPCNYLEPVELRI  |
| P52480 | 326  | RCNRAGKPVICATQMLESMIK  |
| P63323 | 92   | NKKLGEWVGLCKIDREGKPRK  |
| P31948 | 26   | SVGNIDDALQCYSEAIKLDPH  |

---

---

|        |      |                          |
|--------|------|--------------------------|
| Q91VD9 | 463  | QDIASGRHSFCEVLKDAKKPM    |
| Q9R0H0 | 199  | VLAQLITRGEYGLHAFVVP      |
| P56399 | 219  | WLNLTDGSILCGRRYFDGSGG    |
| P68366 | 376  | GDLAKVQRAVCMLSNTTAAIE    |
| Q9EQ20 | 413  | IISNVKPSMTCYKEEIFGPVL    |
| P60843 | 134  | GDYMGASCHACIGGTNVRAEV    |
| P10605 | 319  | FFKILRGENHCGIESEIVAGI    |
| P50995 | 384  | TDESKFNAVLCSRSRAHLVAV    |
| P02766 | 10   | XMASHRLLLLCLAGLVFVSEA    |
| P35250 | 255  | FINSENVFKVCEPHPLLVKE     |
| P53569 | 374  | RALVAAHELLCDKPEEEKALL    |
| P12004 | 81   | NLTSMSKILKCAINEDIITLR    |
| P27348 | 134  | DYFRYLAEVA CGDDRKQ TIDN  |
| Q922E4 | 324  | LLNHFKVDLVCHGKTEIVPDR    |
| Q9Z2W0 | 411  | QDLMVRNDSPCGTTIGPILAS    |
| Q8BMF4 | 483  | DFIIKASALACLKVPEANSSW    |
| Q02566 | 1342 | AHALQSSRHD CDLLREQ YEEE  |
| Q6P1X6 | 98   | YEAAPFLSPCGRERNFLRCE     |
| P52825 | 535  | VGELQHMMAECSKYHGQLTKE    |
| A2AJI0 | 375  | RSASASPLTPCSAPRSAHRCT    |
| P62736 | 287  | HETTYNSIMKCDIDIRKDLYA    |
| Q80YD1 | 251  | FEKSNAAGVPCDLVTGEERLT    |
| P54577 | 250  | DVKKKLKKAFCPEGNVENNGV    |
| Q91VD9 | 92   | IEKAPKVVAACAMPVMKGWNI    |
| P50462 | 25   | KTVYHAEELIQNGRSFHKTCF    |
| P19838 | 61   | KQRFRRFRYVCEGPSHGGLPG    |
| O95816 | 162  | DQKFQSIVIGCALEDQKKIKR    |
| P68404 | 217  | ESKQKTKTIKCSLNPEWNETF    |
| Q00610 | 926  | LACVAYERGQCDLELINVCNE    |
| Q924X2 | 427  | FFVTLDEDSHCYNPDETSLS     |
| Q60597 | 566  | EEEISKYDKICEEAFTRSKDE    |
| Q05816 | 43   | RKMAAMAKPDCIITCDGNNIT    |
| Q9Z0S1 | 206  | RSHSNQLVTD C ISAMNPDTV L |
| Q71RI9 | 338  | IDIKRMDDPECYFNSLPKELE    |
| P12970 | 199  | RLGHLVHRKTCTTVAFQTQVNS   |
| P80313 | 511  | NALTAASEAACLIIVSVDETIK   |
| Q05586 | 798  | LDKTWVRYQECDSRSNAPATL    |
| P30050 | 162  | IDDINSGAVECPASXXXXXXXX   |
| Q62159 | 159  | NRISAFGYLECSAKTKEGVRE    |
| Q9ER60 | 731  | KECVCKIASDCSLPRWHMHDF    |
| Q9CQV5 | 120  | LKRRANQVDICALVLRQLPAH    |
| P29474 | 976  | DGLGPLHYGVCSTWLSQLKPG    |
| P04247 | 67   | KGSEDLKKHGC TVLTALGTIL   |
| P52272 | 676  | WKMLKDKFNECGHVLYADIKM    |
| Q9UQM7 | 280  | WISHRSTVASCMHRQETVDCL    |
| Q8NHW5 | 119  | AAARAGAIAPCEVTVPAQNTG    |
| Q8BGX2 | 52   | GALLRDYAEACGDAAAAARAR    |
| Q99LC3 | 67   | SRVITVDGNI CS GKNKLAKEI  |
| Q9CQ60 | 78   | ASFARWTLGFC DERLVPFDHA   |
| P17751 | 268  | IYGGSVTGATCKELASQPDVD    |
| P05202 | 106  | YLPIGGLAEFC KASAELALGE   |
| Q8QZS1 | 335  | LIMEYRITQACMEGHDFHEGV    |

---

---

|        |      |                                 |
|--------|------|---------------------------------|
| Q3TCJ1 | 237  | VEKSERVVES <b>C</b> QAEVNKLRRQ  |
| Q9WUB4 | 18   | SVKIAPGAVV <b>C</b> VESEIRGDVT  |
| Q9CZY3 | 144  | MKLPQPPEGQ <b>C</b> YSNXXXXXXXX |
| P97351 | 96   | LITEDVQGN <b>C</b> LTFHGMDLT    |
| P62987 | 91   | SLRQLAQKYN <b>C</b> DKMICRKCYA  |
| Q8BZF8 | 60   | SSIDLRDRQG <b>C</b> TMVVGSDGRY  |
| Q15149 | 3667 | NLTyrQLLER <b>C</b> VEDPETGLRL  |
| P12268 | 140  | VFEAKARHGF <b>C</b> GIPITDTGRM  |
| P41216 | 298  | MITHQNIIND <b>C</b> SGFIKATESA  |
| Q61686 | 160  | LVLAKEANVK <b>C</b> PQIVIAFYEE  |
| P17182 | 389  | TFIADLVVGL <b>C</b> TGQIKTGAPC  |
| Q91ZA3 | 359  | RLQVEHPVTE <b>C</b> ITGLDLVQEM  |
| Q96AG4 | 48   | LPKATILDLS <b>C</b> NKLTTLPSDF  |
| Q8BWF0 | 422  | LLSNVTRDML <b>C</b> ITEETFGPLA  |
| P17710 | 214  | LPVGFTF <b>C</b> SFPCRQSKIDEAVL |
| O55143 | 447  | VGEATETALT <b>C</b> LVEKMNVDFT  |
| P21333 | 2543 | VFVDSLTKAT <b>C</b> APQHGAPGPG  |
| Q9CXT8 | 481  | IERLPDFNQI <b>C</b> SNMRWIRDXX  |
| P68040 | 153  | QDESHSEWV <b>C</b> VRFSPNSSNP   |
| P59017 | 136  | QPVTYEAYRE <b>C</b> TVETAVHASG  |
| P38646 | 487  | DGQTQVEIKV <b>C</b> QGEREMAGDN  |
| P10599 | 73   | QDVASECEVK <b>C</b> MPTFQFFKKG  |
| Q16665 | 800  | SGLPQLTSD <b>C</b> EVNAPIQGSR   |
| Q8VE95 | 68   | DDSKMKNFIT <b>C</b> FKDLOFLVTF  |
| P34914 | 120  | IALKKKGFT <b>C</b> IVTNNWLDG    |
| Q91YP0 | 273  | YSDRISEL <b>C</b> GNPDPQIVPFR   |
| P17710 | 879  | CDDSilVKT <b>C</b> VGVSkrAAQL   |
| P26039 | 286  | ERKIFQAHKN <b>C</b> GQMSEIEAKV  |
| O88844 | 363  | SFFAKALEDV <b>C</b> IETIEAGFMT  |
| Q05D44 | 631  | NTEKLRAPI <b>C</b> IVLGHVDTGKT  |
| Q92879 | 62   | SQNPPQSKGC <b>C</b> FVTFYTRKAA  |
| P63244 | 168  | PNSSNPIIV <b>C</b> SGWDKLVKVVN  |
| P48962 | 257  | ADIMYTGTL <b>C</b> DWRKIAKDEGA  |
| Q8BZB2 | 7    | XXXXMEPKAP <b>C</b> PAAVPSEERK  |
| Q8R0N6 | 260  | TAIPYSMRSP <b>C</b> PSNPIQRPAY  |
| O70468 | 784  | PKISNVGEDS <b>C</b> TVQWEPPAYD  |
| Q9CPY7 | 313  | RADMGGAATI <b>C</b> SAIVSAAKLN  |
| Q9Z1Q9 | 478  | YRSTRLVNWS <b>C</b> TLNSAISDIE  |
| Q9DCM0 | 170  | GCGRTDFQ <b>C</b> QGAKTLYHSVHE  |
| Q8CFE6 | 400  | PIRSSVTHLL <b>C</b> PTKEFSWLRH  |
| P61962 | 109  | RVGETETRLE <b>C</b> LLNNNKNSDF  |
| Q9DA03 | 97   | KDLLTENVPY <b>C</b> DAPTQKQXXX  |
| P56375 | 29   | YEVFGTVQGV <b>C</b> FRMYTEGEAK  |
| O08553 | 439  | LEYNIFEGME <b>C</b> RGSPLVVISQ  |
| P68871 | 94   | GTFATLSELH <b>C</b> DKLHVDPENF  |
| O43390 | 292  | PDDKKKNGRF <b>C</b> FLEYEDHKSA  |
| Q07417 | 246  | SSTANLIFED <b>C</b> RIPKENLLGE  |
| P29474 | 1114 | LCLERGHMFV <b>C</b> GDVTMATNVL  |
| Q9EQ20 | 368  | LITPQAKERV <b>C</b> NLIDSGTKEG  |
| Q9D6M3 | 52   | GQRMYSMSD <b>C</b> LIKTIRSEGY   |
| P05202 | 295  | GERVGAFTV <b>C</b> CKDAEEAKRVE  |
| P98170 | 303  | GEGDKVKCFH <b>C</b> GGGLTDWKPS  |

---

---

|        |      |                         |
|--------|------|-------------------------|
| P27695 | 93   | WVKEEAPDILCLQETKCSNK    |
| P47754 | 141  | YVKEHYPNGVCTVYGKKVDGQ   |
| Q5SFM8 | 49   | DKPEKELKAFCADQLDVFLQK   |
| P52480 | 49   | PITARNTGIICTIGPASRSVE   |
| Q99NB1 | 178  | SPLAVAAMLACARIGAIHTVV   |
| Q8BH64 | 138  | FGNTFLNRFMCAQLPNQVLES   |
| P60843 | 131  | MALGDYMGASCHACIGGTNVR   |
| Q8BWM0 | 382  | APSVHHVNPSCKDXXXXXXXXX  |
| Q8R143 | 63   | SCLWCNENKACMDYPVRKILP   |
| O09131 | 90   | GHLVTESVITCEYLDEAYPEK   |
| Q5M6W3 | 326  | ISLGEYERAACFEAANSPKRIL  |
| Q99536 | 50   | AAAASPELLRCLVLTGFGGYD   |
| Q9EQ20 | 149  | FRGLQVVEHACSVTSLMLGET   |
| P47757 | 206  | QMEKDETVSDCSPHIANIGRL   |
| P13639 | 290  | PEGKKLPRTFCQLILDPFKV    |
| P47712 | 151  | CPDLRFSMALCDQEKTFRQOR   |
| Q9CQA3 | 70   | MQTYEVDLNCGPMVLDALIK    |
| Q80YD1 | 418  | ARKFNDPNDPCKILVATDAIG   |
| Q91WK1 | 114  | VADVDMSRDSCVGADDRSWVF   |
| Q15366 | 158  | IAGIPQSIIECVKQICVVMLE   |
| P17742 | 161  | KTSKKITISDCGQLXXXXXXXXX |
| P35247 | 40   | TMPSACTLVMCSSVESGLPGR   |
| O35309 | 183  | QTRDKLELSFCKSRNGGGEVE   |
| Q9CZR8 | 148  | QOVALGTMAHCQNLTDRLSTY   |
| P48643 | 407  | EAKRSLHDALCVIRNLIIRDNR  |
| P50462 | 123  | KFGESEKCPRCGKSVMYAAEKV  |
| Q09161 | 483  | FSALCPANPTCIYKYGDESSN   |
| P97351 | 111  | HGMDLTRDKMCSMVKKWQMI    |
| Q8BGK2 | 137  | SGFGAATKAMCIGMRYWKPER   |
| P53395 | 333  | PILNASVDENCQNITYKASHN   |
| P10518 | 203  | VMSYSAKFASCIFYGPPFRDAAQ |
| Q62095 | 222  | IIKEKRDLMACAQTGSGKTAA   |
| P61106 | 26   | IIGDMGVGKSCLLHQFTEKKF   |
| P49717 | 604  | TLSIAKAGIICQLNARTSVLA   |
| Q99NB9 | 933  | KRVKPYLPQICGTVLWRLNNK   |
| P98170 | 351  | NIHLTHSLEECLVRTTEKTPS   |
| P41216 | 626  | RGLQGSFEELCRNKDINKAIL   |
| Q99L04 | 177  | KAACDRLAADCAHELRRHGVS   |
| P53396 | 229  | AKVDATADYICKVKWGDIEFP   |
| P78527 | 1507 | RQCLPSLDLSCKQLASGLLEL   |
| P78527 | 1499 | KGIAPGDERQCLPSLDLSCQ    |
| P00558 | 50   | IKA AVPSIKFCLDNGAKSVVL  |
| P26641 | 194  | FPNTNRWFLT CINQPQFRAVL  |
| P06801 | 164  | ERILGLGDLGCMGMGIPVGKL   |
| Q8BMS4 | 156  | LSGMKILDVCGGGLLTEPLG    |
| Q8VDC0 | 625  | DIDFTGPAPVCAKTKEKLEVT   |
| P17563 | 8    | XXXMATKCTKCGPGYSTPLEA   |
| Q9WV60 | 317  | PRTPEAIALCSRLLEYTPTA    |
| P62913 | 150  | SIADKKRRRTGIGAKHRISKE   |
| Q60932 | 140  | GYKREHINLGCDVDFDIAGPS   |
| Q00987 | 77   | YDEKQOHIVYCSNDLLGDLFG   |
| Q78J03 | 162  | DGPKPTGQRF CINSVALKFKP  |

---

---

|        |      |                          |
|--------|------|--------------------------|
| Q9CQN1 | 263  | TKIIHLKSDCKDFASESRVQ     |
| Q9WTZ1 | 61   | AICRVQVMDACLRCQAENKQE    |
| Q9D517 | 254  | LYGKKYEADMVRRFPLEDIP     |
| P43897 | 71   | FVNCKKALET CGGDLKQAEIW   |
| Q02566 | 1750 | QTEVEEAVQECRNAEEKAKKA    |
| P51787 | 445  | EKMLTVPHITCDPPEERRLDH    |
| P21817 | 35   | ATVLKEQLKLCLAAEGFGNRL    |
| Q6IFX4 | 453  | GPPSRILVKICTITKEIKDGK    |
| Q9WU65 | 381  | YWEPSARGIICGLTQFTNKCH    |
| O95801 | 367  | VKALTPAFLV CVGSSPFCKNF   |
| Q9Z2I9 | 384  | LVNIFGGIMRCDVIAQGIVMA    |
| P30999 | 533  | WESVLTNTAGCLRNVSSERSE    |
| P63242 | 73   | IFTGKKYEDI CPSTHNMDVPN   |
| P54310 | 743  | CRETRQATEF CVQIRLILTP    |
| Q8R1G2 | 222  | HGFVHRKRED CSPADKPYIEE   |
| P21980 | 524  | VSYNGILGPECGTKYLLNLNL    |
| P50462 | 168  | NVTDKDGELYCKVCYAKNFGP    |
| O55143 | 524  | KGAPEGVIDR CTHIRVGSTKV   |
| P61620 | 13   | IKFLEVIKPF CVILPEIQKPE   |
| Q8CI94 | 446  | DCKRINMAHL CVIGSHAVNGV   |
| P10599 | 62   | VIFLEVDVDDCQDVASECEVK    |
| Q8K411 | 627  | LFCSVLTKLGGILNYREQAQ     |
| Q9WV55 | 179  | DTETRKLMEECKRLOGEMMKL    |
| Q8BIJ6 | 110  | QRERKVKTEF CLHDGPPYANG   |
| P12382 | 351  | NQSVRLPLME CVQVTKDVQKA   |
| O95861 | 243  | ASAYVFASPGCKKWDTCAPEV    |
| P11499 | 366  | YVRRVFIMDS CDELIPEYLN    |
| P51660 | 189  | AIEGRKNNIHCNTIAPNAGSR    |
| O08992 | 240  | RNGLLTDHHICEINGQNVIGL    |
| Q8BKY8 | 276  | SISFTKTTFECTDYDLRQLVV    |
| P10649 | 115  | MDTRMQLIMLCYNPDFEKQKP    |
| Q3B7Z2 | 461  | RLEENGYRSICEQVSHHPAA     |
| O08715 | 352  | ATQPKGKEESCVPASQETSLG    |
| P10518 | 75   | LRPLVEAGLRCVLI FGVP SRV  |
| P32322 | 262  | SLLINAVEASCIRTRELQ SMA   |
| P85094 | 84   | AQGIRPVSKT CFSMVPALQKE   |
| P62993 | 32   | GDILKVLNEECDQNWYKAELN    |
| Q8K2C6 | 293  | DRFRFHFPGPCGKTLPEALAP    |
| P27659 | 114  | TVFAEHISDECKRRFYKNWHK    |
| Q9D0K2 | 504  | TVDDIKKSTGCDFAVSPNLMP    |
| Q3ULD5 | 431  | DGAKMVAAVACA KVPKITV I I |
| P35505 | 315  | GEGMSQAATICRSNFKHMYWT    |
| P70695 | 331  | SPEDVQEYLS CVQRNQAGRXX   |
| P26039 | 2480 | LVKAAQKAAACEDQENETVVV    |
| O95372 | 56   | TIRLPHVKYICPHAPRI PVTL   |
| P21266 | 208  | IAAYLQSDQFC KMPINNKMAQ   |
| Q99KI0 | 385  | LDIRVGLIGSCTNSSYEDMGR    |
| P50396 | 202  | YRTDDYLDQPCLETINRIKLY    |
| P84075 | 185  | SDPSIVRLLQCDPSSASQFXX    |
| Q9H9Q2 | 110  | TIVSLASRMKCI PYSVLLKDL   |
| P62281 | 60   | AIEGTYIDKCKPFTGNVSIRG    |
| O43395 | 37   | EPTVVTAALN CVGKGMDDKKA   |

---

---

|        |     |                        |
|--------|-----|------------------------|
| P10809 | 237 | YFINTSKGQKCEFQDAYVLLS  |
| P07237 | 56  | VEFYAPWCGHCKALAPEYAKA  |
| P84091 | 337 | PLNTSGVQVICMKGKAKYKAS  |
| Q99MR8 | 505 | SHSTIAKESVQQAALGLILKE  |
| P07900 | 481 | GDEMVSLKDYCTRMKENQKHI  |
| P28659 | 177 | AMHQAQTMEGCSSPMVVKFAD  |
| O76021 | 197 | SKNLSREINDCIGGTVLNISK  |
| P85094 | 136 | GLQVHVVDACSSRSQVDRLV   |
| Q9WTX5 | 120 | LDIKGLLDVTKTVANMIKKG   |
| Q8BG51 | 572 | HKMPPQAFTCNTADAPSKDI   |
| P14866 | 260 | SLNGADIYSGCTLKIEYAKP   |
| Q8BH59 | 563 | GQTTYSGVVD CFRKILREEGP |
| P62889 | 85  | SGNNIELGTACGKYRVCCTLA  |
| Q9H0F7 | 148 | VTSVKVSQLLCLENIKDKPWH  |
| P05213 | 315 | CDPRHGKYMACCLLYRGDVVP  |
| Q9QYG0 | 321 | LQMGYMASSCMTRLRSRRTA   |
| Q9CWJ9 | 363 | ILSKKNGNYCVLQMDQSYKP   |
| Q8K2B3 | 238 | NGECRGVIALCIEDGSIHRIR  |
| P30416 | 396 | NKAAKTQLAVCQQRTRQLAR   |
| Q8BLF1 | 345 | EALPKTYILTCEHDVLRDDGI  |
| P58252 | 693 | FQWATKEGALCEENMRGVFRD  |
| Q99MR8 | 186 | GYHGKDQSDQCLREHAGKIGY  |
| Q7TNV0 | 165 | KFRNAMLKSI CEVLDLERSGV |
| P00492 | 106 | TVDFIRLKSXCNDQSTGDIKV  |
| P29218 | 184 | MVLSNMEKLCIPVHGIRSVG   |
| P23919 | 31  | TQSRKLVEALCAAGHRAELLR  |
| Q91ZA3 | 394 | DIPISGWAVECRVYAEDPYKS  |
| A3KMP2 | 124 | MFAKGNFPRACDLWEQILRDH  |
| Q92769 | 274 | ADSLSGDRLGCFNLTVKGHAK  |
| P13639 | 41  | GKSTLTDSLVC KAGIIASARA |
| P50991 | 295 | NLVKQIKKTGCNVLLIQKSIL  |
| Q9QYG0 | 371 | GPPGHTMEVSCXXXXXXXXXX  |
| Q9JHI5 | 134 | GLSYGAHSNLCVNQIVRNGNE  |
| P70296 | 133 | LVYEQEQPLSCDEPILSNKSG  |
| Q8K2B3 | 266 | TGGYGRTYFSC TSAHTSTGDG |
| Q6P8J7 | 90  | MTPSGYTLDCIQTGVDNPGH   |
| Q922B1 | 264 | EHRLRSVAFP CISTGVFGYPN |
| P70398 | 787 | VVIQSNDDIACRAIDLLEKIY  |
| P26883 | 23  | GRTFPKRGQTCVVHYTGMLD   |
| P21126 | 13  | LTVKALQGRECSLQVAEDELV  |
| P50579 | 436 | SKYLMALKNLCDLGIVDPYPP  |
| Q3ULJ0 | 216 | KNIVAVGAGFC DGLRCGDNTK |
| O35643 | 863 | ENEAQFQIRDCPLNTEAASNK  |
| Q5U458 | 494 | KVIDVTVPLQCLVKDSKLILT  |
| P45952 | 244 | GKKELNMGQRCSDTRGIAFED  |
| P17751 | 117 | DPKIAVAAQNCYKVTNGAFTG  |
| P97494 | 501 | CKGGNAVVDGCSKAQSSSEPA  |
| P45880 | 76  | TGTLETKYKWC EYGLTFTEKW |
| Q7TPV4 | 361 | STYVGTFLQCGQDDPKRQLTM  |
| P46459 | 250 | FPPEIVEQMGCKHVKGILLYG  |
| Q8BP47 | 522 | WYTDQRKYGTCPHGGYGLGLE  |
| Q9CQM9 | 148 | RLKKLTHAAPCMLFMKGTPQE  |

---



---

|        |      |                                                                                                                         |
|--------|------|-------------------------------------------------------------------------------------------------------------------------|
| Q9EPV8 | 6    | XXXXXMIEVV <span style="color:red">C</span> NDRLGKKVRV                                                                  |
| Q78IK4 | 152  | LGLATLGATV <span style="color:red">C</span> YPAQSVIIAK                                                                  |
| P14206 | 163  | PLRYVDIAIP <span style="color:red">C</span> NNKGAHSVGL                                                                  |
| Q99L13 | 250  | AKILNMSSGR <span style="color:red">C</span> WSSDTYNPVP                                                                  |
| Q8VCI5 | 229  | QQQHSVMVKI <span style="color:red">C</span> EQFEAETPTD                                                                  |
| Q99832 | 450  | KALEIIPRQL <span style="color:red">C</span> DNAGFDATNI                                                                  |
| P28482 | 166  | LLNTTCDLKI <span style="color:red">C</span> DFGLARVADP                                                                  |
| O00299 | 191  | LPKLHIVQVV <span style="color:red">C</span> KKYRGFTIPE                                                                  |
| O08529 | 405  | DEDEEDGERG <span style="color:red">C</span> TFLVGLIQKH                                                                  |
| Q8C460 | 285  | LKKAYSFAMG <span style="color:red">C</span> WPKNGLLDMN                                                                  |
| P62913 | 72   | IRRNEKIAVH <span style="color:red">C</span> TVRGAKAEEI                                                                  |
| Q811U4 | 681  | QEMATTFARL <span style="color:red">C</span> QQVDVTQKHL                                                                  |
| P12382 | 708  | RVFANAPDSA <span style="color:red">C</span> VIGLRKKVVA                                                                  |
| O15519 | 259  | KPLGICLIID <span style="color:red">C</span> IGNETELLRD                                                                  |
| Q7TPD0 | 346  | LSTPDSQSLR <span style="color:red">C</span> DLIRYICGVV                                                                  |
| P58404 | 720  | LRLWSLDNKT <span style="color:red">C</span> VQEITAHKK                                                                   |
| P63276 | 35   | GNDFHTNKR <span style="color:red">V</span> <span style="color:red">C</span> EEIAIIPSKK                                  |
| P68366 | 347  | TKRSIQFVDW <span style="color:red">C</span> PTGFKVGINY                                                                  |
| Q6PDN3 | 1291 | GKVAGTQPIT <span style="color:red">C</span> KWMKFRKQIQ                                                                  |
| Q8BTM8 | 623  | VEGPSQAKIE <span style="color:red">C</span> DDKGDGSCDV                                                                  |
| Q8BXG3 | 410  | TLLQSKLKEK <span style="color:red">C</span> NMTRDMHAAV                                                                  |
| P85094 | 21   | ILPESSILFL <span style="color:red">C</span> DLQEKFRPSI                                                                  |
| B1AR13 | 119  | TCKATQRP <span style="color:red">P</span> <span style="color:red">Y</span> <span style="color:red">C</span> DGTHKSEQVQ  |
| P17182 | 399  | CTGQIKTGAP <span style="color:red">C</span> RSERLAKYNQ                                                                  |
| Q14003 | 370  | TFEFLMRITF <span style="color:red">C</span> PKVEFLKSS                                                                   |
| P40227 | 406  | RAVKNAIDDG <span style="color:red">C</span> VVPGAGAVEV                                                                  |
| P29474 | 201  | GKLQVFDARD <span style="color:red">C</span> RSAQEMFTYI                                                                  |
| Q9CQ62 | 268  | FEKEMIDRIP <span style="color:red">C</span> GRLGTMEELA                                                                  |
| Q91Z53 | 29   | GRAALAOAAD <span style="color:red">C</span> EVEQWNSDDP                                                                  |
| Q64727 | 545  | GPYRQDLLAK <span style="color:red">C</span> DRVDQLTAQL                                                                  |
| P10637 | 614  | PVDLSKVTSK <span style="color:red">C</span> GSLGNIHHKP                                                                  |
| P31749 | 224  | KYSFQTHDRL <span style="color:red">C</span> FVMEYANGGE                                                                  |
| Q9DCW4 | 42   | DGVKHSMPN <span style="color:red">P</span> <span style="color:red">F</span> <span style="color:red">C</span> EIAVEEAVRL |
| P13489 | 248  | KLGDVGMAEL <span style="color:red">C</span> PGLLHPSSRL                                                                  |
| P09411 | 380  | IIGGGDTAT <span style="color:red">C</span> CAKWNTEDKVS                                                                  |
| O70250 | 23   | ESLWNQENRF <span style="color:red">C</span> GWFDAELSEK                                                                  |
| Q9NR33 | 84   | FVETIAKDAY <span style="color:red">C</span> CAQQGKRKTL                                                                  |
| Q8K411 | 556  | TQQSKHQDAS <span style="color:red">C</span> LPALKVSDIE                                                                  |
| Q00610 | 491  | RANVPNKVIQ <span style="color:red">C</span> FAETGOVQKI                                                                  |
| Q7TMF3 | 92   | VPPEWHRWLH <span style="color:red">C</span> MTDDPPTNP                                                                   |
| P63244 | 138  | TIKLWNTLGV <span style="color:red">C</span> KYTVQDESHS                                                                  |
| Q8BIJ6 | 883  | PGLEEAVESA <span style="color:red">C</span> CAMRDSFLGSI                                                                 |
| Q99P88 | 799  | YQALALWKLL <span style="color:red">C</span> EHQFSVIVGE                                                                  |
| O35737 | 22   | VVKVRGLPWS <span style="color:red">C</span> SADEVQFFS                                                                   |
| P28659 | 150  | LRGPDGLSRG <span style="color:red">C</span> AFVTFTRTM                                                                   |
| P36873 | 127  | NFFLLRGNHE <span style="color:red">C</span> CASINRIYGFY                                                                 |
| Q8BIJ6 | 465  | KEENIVHSYP <span style="color:red">C</span> DWRTKTPVLI                                                                  |
| Q8BZA9 | 114  | RAMAKAAGEE <span style="color:red">C</span> PMFTPPGGET                                                                  |
| Q6A068 | 769  | EDSAIPRRLE <span style="color:red">C</span> CLKEDVQRQE                                                                  |
| Q8CI94 | 143  | GNGGLGRLAA <span style="color:red">C</span> FLDSMATLGL                                                                  |
| O54931 | 416  | TQAAKEQKAP <span style="color:red">C</span> VSESQSAGAG                                                                  |
| P14824 | 96   | IVNLMRPLAY <span style="color:red">C</span> DAKEIKDAIS                                                                  |

---

---

|        |     |                        |
|--------|-----|------------------------|
| O70370 | 281 | YKSGVYDDPSCTGNVNHGVLV  |
| P29474 | 212 | RSAQEMFTYICNHIKYATNRG  |
| P58252 | 751 | MEPIYLVEIQCPPEQVVGIIYG |
| Q8K0S0 | 261 | RDRLPLLDIACNKFLTCSVED  |
| P34914 | 78  | DESYRKSSKACGANLPENFSI  |
| P21981 | 553 | LRILYEKYSGLTESNLIKVR   |
| Q91Z53 | 123 | ELAVSLLLTTCRRLPEAIEEV  |
| Q9CPY7 | 462 | NLGKYRSAGACTAAAFREFV   |
| O55234 | 111 | LGTMAGGAADCSFWERLLARQ  |
| Q64462 | 250 | TPHGRRFLRACQIAHDHTDHV  |
| P52657 | 98  | IKVDKVKIVACDGKNTGSNTT  |
| P28474 | 240 | AKAKEFGASECISPQDFSISI  |
| P97823 | 211 | KIYEGMMHSSCQEMMDVKHF   |
| P42574 | 163 | GKPKLFI IQACRGTELDGIE  |
| O55137 | 14  | TLNLEPSGRSCWDEPLSIAVR  |
| Q9CQW1 | 66  | RASVKEQEYLCHVYVRSDSL   |
| Q8BU88 | 166 | GRFGIMEKVYCHYFVKLVEGP  |
| Q9EPV8 | 18  | DRLGKKVRVKCNTDDTIGDLK  |
| P62746 | 107 | EKWVPEVKHFCPNVPIILVAN  |
| O70433 | 132 | WHETCFTCQRCQQPIGTKSFI  |
| P54822 | 27  | LAARYASREMCFLFSDRYKFQ  |
| O14920 | 179 | YAKELDQGSLECTSFVGTLOYL |
| Q9D2G2 | 246 | AQRLKEAQNTCAMLTFNEVD   |
| Q8K2C6 | 124 | PNPGHLAIAQCEARLRDQGR   |
| Q62426 | 64  | FIKVDVGGDKCVHLRVFQPLP  |
| P09411 | 316 | GIPAGWMGLDCGTESKKYAE   |
| Q14139 | 465 | SRLTFNPTYCALKELNDEER   |
| Q99MK8 | 120 | DSYIMKELLACSHPFKSNATE  |
| P70168 | 223 | SERHFIMQVVCBATQCPDTRV  |
| P53811 | 94  | HEKAWNAYPYCRTIVTNEYMK  |
| Q9CQH8 | 23  | SPSEYHYMKVCLFQEHGVGL   |
| P00403 | 196 | ATRPGVYYGQCSEICGANHSF  |
| Q9Z2Z6 | 283 | MIRAFPANAACFLGFEIAMKF  |
| P70168 | 585 | IQFNDLQSLLCATLQNVLRKV  |
| P21980 | 545 | EPFSEKSVPLCILYEKYRDCL  |
| Q9WUM4 | 330 | MPKRGLDVNKCEIARFFKLHE  |
| Q8BWT1 | 179 | AAKYNISRECDRYALQSQQR   |
| Q8VE38 | 68  | RREVMAAAKVCEITHESPSVK  |
| P30041 | 91  | AWSKDINAYNCEEPTEKLPFP  |
| Q8BG51 | 535 | KQHFMDSRIPCLIVAAKSDLH  |
| P35754 | 79  | TVPRVFIGKDCIGGCSDLVSL  |
| P85094 | 206 | LFQGSPLTSCXXXXXXXXXX   |
| Q99961 | 147 | QNFIDPLQNLCEKDLKEIQHH  |
| O55023 | 183 | RIVLSNMEKLCIPIHGIRSV   |
| Q9CQJ8 | 4   | XXXXXXXXMAFCAPPAYLTHQQ |
| O75822 | 207 | KKITNSLTVLCSKQKQEKQS   |
| Q9UL62 | 553 | ETRAIDEPNNCKGIRCEKQNN  |
| P55769 | 30  | KKLLDLVQQSCNYKQLRKGAN  |
| Q62234 | 406 | GREGETMSLGRVVITPEIKH   |
| Q8VEK3 | 311 | ASYGVSKGKVCFEMKVTEKIP  |
| P60520 | 15  | FKEDHSLEHRCVESAKIRAKY  |
| Q9CQ62 | 86  | TTFLSTLGAQCVIASRNIDVL  |

---

---

|        |      |                         |
|--------|------|-------------------------|
| P61163 | 34   | GFAGDQIPKYCFPNYVGRPKH   |
| P50570 | 86   | SKTEHAEFLHCKSKKFTDFDE   |
| P56391 | 65   | EWYRRVYKSLCPVSWVSAWDD   |
| Q60870 | 14   | RFDRFLHEKNCMTDLLAKLEA   |
| P17174 | 46   | LGVGAYRTDDCHPWVLPVVKK   |
| Q8K2B3 | 654  | VIDKTLNEADCATVPPAIRSY   |
| Q8VDQ1 | 187  | LLGCSRVVGICGTQEKCLFLT   |
| P21817 | 1302 | LPVQFHQHFRC TAGATPLAPP  |
| Q99L13 | 210  | AVGTGQSAKICNNMLLAISMI   |
| Q8K2M0 | 321  | MTPAGLAFFQCRWDDSVTHTF   |
| Q9EP69 | 445  | KNAWADNANACAKQYAGTGAL   |
| Q9DBF1 | 70   | GGRGEVITTYCPANNEPIARV   |
| P13707 | 329  | FPLFTAVYKVCYEGQPVGEFI   |
| Q8CI94 | 437  | RRMSVIEEGDCKRINMAHLCV   |
| P22314 | 632  | QDPPEKSIPICTLKNFPNAIE   |
| P62879 | 25   | RNQIRDARKACGDSTLTQITA   |
| Q9CZ13 | 380  | FFLQGQWMRLCTSATESEVTR   |
| Q9NQC3 | 1101 | YSNSALGHVNC TIKELRRLFL  |
| P08752 | 66   | IHEDGYSEEECRQYRAVVYSN   |
| P31327 | 600  | YALGGLGSGICPNRETLMDLS   |
| Q62261 | 1389 | ANKAELFTQSCADLDKWLHGL   |
| Q9D0M3 | 139  | YVAYRHLVGVCYTEEEAKALA   |
| Q9H9Q2 | 240  | EMEQQLAERECPPHAEQRQPT   |
| Q60932 | 245  | AAKYQVDPDACFSAKVNNSL    |
| P41567 | 69   | LVKAFKKKFCNGTVIEHPEY    |
| Q6P3A8 | 297  | SMAQEKLGVSCEVIDLRTIVP   |
| P45984 | 163  | KPSNIVVKSDC TLKILDFGLA  |
| O35678 | 32   | LVNADGQYLF CRYWKPSGTPK  |
| Q99JX4 | 125  | KNTPVRYTVYCSLIKVAASCG   |
| P21283 | 225  | VLSEDQDSYLCNVTLFRKAVD   |
| Q8K1A5 | 44   | GSKDHLNEKPCA EAGSARTSL  |
| P19253 | 38   | LLGRKVVVVRCEGINISGNFY   |
| Q99LD8 | 262  | LSDVTLVPVSCSELEKAGAGL   |
| P12979 | 65   | LGTPEHCPGQCLPWACKVCKR   |
| Q3UQ84 | 585  | QYKGPAGTPECPVLIHRAVLG   |
| Q9CR24 | 71   | KGEVSFPGGKCDPDDQDVIHT   |
| Q99K01 | 491  | CIQSKLPVLTCTLQLREEFKQ   |
| P99028 | 65   | VSSRSQTEEDCTEELDFDLHA   |
| Q91VD9 | 564  | CITRQDLPKDC FIVYQGGHGD  |
| O08573 | 138  | HLVDTIAVSGCLKLSFITFQN   |
| Q13257 | 106  | VLERWQFDIECDKTAKDD SAP  |
| Q9CZC8 | 324  | VKLVPKAQSPCFGDDDP AKKE  |
| Q9D0F9 | 374  | NLMDASKLSL CGEESFGTGSD  |
| P31943 | 267  | SDRFGRDLNYCFSGMSDHRYG   |
| P23975 | 351  | RDALLTSSINCITSFVSGFAI   |
| P04406 | 152  | NSLKII SNASC TTNCLAPLAK |
| O35459 | 186  | DLVSACDIRYCTQDAFFQIKE   |
| Q15185 | 76   | HKRTDRSILCCLRKGESGQSW   |
| P62888 | 52   | KAKLVILANNC PALRKSEIEY  |
| Q13144 | 618  | MDSPLDSSRYCALLLPLLKAW   |
| Q9CZ42 | 306  | SPLLVAAWGACTLTRECNRQA   |
| Q8BIJ6 | 311  | PWTIPANQAI C YMPEAKYAVV |

---

---

|        |      |                        |
|--------|------|------------------------|
| Q9CQL4 | 93   | YPAFIVNLIKQVELNRKVLV   |
| P16858 | 282  | LGYTEQVVSDFNSNSHSST    |
| Q9CQE3 | 100  | RVIDPVTGKPCAGTAYLESPL  |
| P18206 | 85   | PPAFIKVENACTKLVQAAQML  |
| P05063 | 178  | ANVLARYASIQQONGIVPIVE  |
| Q9WVQ5 | 96   | PASKKLKKSQCTPLFMNAYTM  |
| P58281 | 551  | TRNLSLAVSDCFWKMVRESVE  |
| Q9QYJ0 | 308  | YPPGKVIIEPGCVRVVRGEGMP |
| Q9CZR8 | 314  | VTVVDFVRFECGEDEQVAEAE  |
| Q9JHW2 | 97   | EEDAGKLYNTCSVFGPDGSL   |
| Q9CR00 | 81   | QVRTARHNIICLQNDHKALMK  |
| Q61233 | 336  | REKDDIQRAECMLQQAERLGC  |
| P84086 | 105  | TRPKKAIPAGCGDEEEEEES   |
| P99028 | 35   | VDPLTTVREHCEOLEKCVKAR  |
| P97443 | 74   | RCGQCKFAHYCDRTCQKDAWL  |
| P07814 | 92   | LEFSATKLSSCDSFTSTINEL  |
| Q9Y2S7 | 143  | YYQVLIDARDCPHISQRSQTE  |
| A6H611 | 446  | FQRANKPQQDCHFTIRGGRLK  |
| P14866 | 261  | LNGADIYSGCCTLKIEYAKPT  |
| P14873 | 1936 | IKTPEDGGYTCEITEKTTRTP  |
| Q9CX34 | 49   | EQNPDDAQYYCQRAYCHILLG  |
| P22102 | 298  | EFNCRFGDPECQVILPLLKSD  |
| Q9DCB8 | 79   | FLRLQVEGGGCSGFQYKFLD   |
| P55072 | 572  | IFDKARQAAPCVLFFDELDSI  |
| Q62312 | 76   | NGGAVKLPQLCKFCDVRLSTC  |
| Q922Q8 | 140  | DCLDEKQCKQCANKVLQHMKA  |
| Q6NSR8 | 284  | KTTPGMKRDGGAAAVLGAF    |
| Q922B1 | 114  | SDKQREEHYFCKDFIKLKKIP  |
| Q8VDN2 | 249  | TRNIAFFSTNCEVEGTARGIVV |
| Q9CR62 | 184  | EEGVPTLWRGCIPTMARAVVV  |
| Q8R3V5 | 267  | VKSQTTYAAQCYRHMLDLQKQ  |
| P55036 | 87   | TVQPKGKITFTGIRVAHLAL   |
| O43765 | 129  | ELNPANAVYFCNRAAAYSCLG  |
| P40937 | 238  | GKVTEETVYCTGHPLKSDIA   |
| P55072 | 535  | TLLAKAIANECQANFISIKGP  |
| Q8CGY6 | 519  | KLAKQCRKWLANTAIDTRTRR  |
| Q05816 | 87   | TADGRKTETVCTFQD GALVQH |
| Q3U1J4 | 378  | ERQGQQLVTC SGAFKEGSLR  |
| Q8VHX6 | 729  | VIPNGDGTFRCSYVPTKPIKH  |
| Q60597 | 331  | VIRKELEQIFCQFDSKLEAAD  |
| P47857 | 334  | LLEGTPDTPACVVSLSGNQAV  |
| O35459 | 91   | NRAFWRELVECFQKISKSDSDC |
| Q9D0S9 | 75   | PADILYEDQQCLVFRDVAPQA  |
| Q99J39 | 401  | QALQGPLMRLCAWYLYGEKHR  |
| O94760 | 274  | ELEKVDGLLTC SVLINKKVD  |
| Q8R2L5 | 101  | CIYGRHITGLCGKKQREITKA  |
| Q00610 | 934  | GQCDLELINVCNENSLFKSLS  |
| Q5UIP0 | 312  | DNFALNPDILCSAKRLKLLMQ  |
| Q8BTM8 | 2476 | IDGPSKVKMDCQECPEGYRVT  |
| O55125 | 83   | KIQFHNVKPECLDAYNSLTEA  |
| P62857 | 27   | VLGRTGSQGQCTQVRVEFMDD  |
| Q8R127 | 238  | KLKRRWPVSYCRELNSYSIPF  |

---

---

|        |      |                          |
|--------|------|--------------------------|
| Q9CXT8 | 248  | RIVLAAAGGVCHNELLELAKF    |
| P13010 | 235  | YSFSESLRKL CVFKKIERHSI   |
| Q8R1F1 | 154  | SKSGSTPILK CPTQFPLILWH   |
| Q80X90 | 2115 | APAVATVGSICDLNLKIPEIN    |
| P51174 | 166  | KFIPQMTAGK CIGAIAMTEPG   |
| P14866 | 581  | NGPYPYTLKL CFSTAQHASXX   |
| P97372 | 33   | NLFQEADDFL CTF LPRKIISL  |
| P50396 | 282  | GEVARCKQLI CDPSYIPDRVQ   |
| Q92600 | 91   | TLTAHQSNRVCNALALLQCV     |
| P12979 | 70   | HCPGQCLPWACKVCKRKS SVS   |
| O88587 | 234  | AYVRGSSSFE CTHYSSYLEYM   |
| Q9D051 | 306  | WPQFGVGAEI CARIMEGPAFN   |
| P29474 | 991  | SQLKPGDPVPCFIRGAPSFRL    |
| P08207 | 62   | VDKIMKDLDCRDGKVG FQSF    |
| Q3V4B5 | 37   | KLGMVSSSDSCRS LKYPYVAV   |
| Q9JKX6 | 75   | PVLQRTLHHE CVILVKQFRPP   |
| Q9DAS9 | 43   | SKASADLMSY CEEHARSDPLL   |
| Q8K411 | 780  | KYLLNCDNMRCSVNATPQQMP    |
| Q99JW4 | 22   | RCKGGFAPAECIVNSNGELYH    |
| O88342 | 170  | YRLATGSDDNCAAF FEGPPFK   |
| P42772 | 74   | LLLLHGAEPNCADPATLTRPV    |
| P06745 | 133  | NRVLDKMKSF CQVRVSGDWKG   |
| Q8CIM3 | 37   | RACVGLKRLG CPRGVYSPLAH   |
| Q5SW19 | 665  | SEDSIGPEAGCEEEGSSVSGL    |
| Q9D7X3 | 124  | AHKNGRVLVHCREGYSRSPTL    |
| P45376 | 187  | KYKPAVNQIECHPYLTQEKLI    |
| P47738 | 388  | SGQQEGAKLLCGGGAAADRGY    |
| P47857 | 709  | RIFANTPDSGCVLGMRRKRALV   |
| P55060 | 387  | SDIDTRRRRAACDLVRGLCKFF   |
| O75828 | 226  | RKADRILVNACCPGPVKTDMD    |
| P98078 | 138  | VTDNRAFGYVCGGEGQHQFFA    |
| O08528 | 368  | RLGLSPLQEDCVATHRICQIV    |
| Q8VDN2 | 428  | WFALSRIAGLCNRAVFQANQE    |
| P48725 | 2650 | KTLKHHTQKGCVLNRQSKSSL    |
| P08249 | 89   | GYLGPQLPDCLKGCDVVVIP     |
| O09131 | 32   | GQIRVYSMRF C PFAQRTLMLVL |
| Q9DBL1 | 261  | NKMGIRASSTCQLTFENVKVP    |
| Q8K274 | 24   | VKATGHSGGCGISQGSYDTD     |
| Q7L8L6 | 670  | KAAVPLGGFLCNVADKSGAME    |
| Q9CR21 | 140  | IPDIDAEKLMCPQEIVDYIAD    |
| Q9Z2U0 | 63   | LQDERTVRKICALDDNVCMAF    |
| P70670 | 1866 | LLVSPAKGSDCLHSPKGPVGS    |
| Q02257 | 372  | TSNSPRLVQNC LWTLRNLSDV   |
| Q71FD7 | 334  | ECMGRNFBHENCYRCEDCSVLL   |
| Q923E4 | 390  | FNQVVPRCPRCPADEPLAIMK    |
| Q9JJX8 | 38   | AIGKGSFGKVCIVQKRDTKKM    |
| P80313 | 158  | KVEQRKMLEKCAMTALSSKLI    |
| Q8BUV3 | 284  | QATSRLSTASCPTPKQIRRPD    |
| Q8NBI5 | 226  | PLPPNYSYGLCPGNGTTKEEK    |
| P13639 | 728  | GGQIIPTARRCLYASVLT AQP   |
| O08528 | 794  | TKFLSQIESDCLALLQVRAIL    |
| P82933 | 330  | VDRLGKHDVCTVSGGGRSAQ     |

---

---

|        |      |             |               |
|--------|------|-------------|---------------|
| Q99KI0 | 126  | PKVAVPSTIHC | DHLIEAQVGG    |
| Q91VT4 | 5    | XXXXXXMDKV  | CAVFGGSRGIG   |
| P78527 | 25   | LQETLSAADR  | CGAALAGHQLI   |
| P58281 | 375  | LRMRKNVKEG  | CTVSPETISLN   |
| Q8BFS6 | 54   | GLMKAWSTGN  | CDAGGDEWGQE   |
| P10649 | 174  | LDQYRMFEPK  | CLDAFPNLRDF   |
| O00220 | 336  | VTVQSPGEAQ  | CLLGPAEAEGS   |
| P61979 | 145  | YQHYKGSDFD  | CELRLLIHQSL   |
| Q15527 | 38   | RCILTGHELP  | CRLPELQVYTR   |
| Q15527 | 29   | RLQTDARKVR  | CILTGHELPCR   |
| Q91YR7 | 739  | REAYNQGLKK  | CPHSTPLWLLL   |
| Q924M7 | 11   | MASPRVFPLS  | CVVQOYAWGKV   |
| Q497Q6 | 177  | QDDEKRTLLO  | CETGKIYTMKE   |
| P24270 | 393  | VANYQRDGP   | CMHDNOGGAPN   |
| P21817 | 1039 | ATKRSNRDSL  | CQAVRTLLGYG   |
| Q60936 | 617  | HRKMGGSF    | LICSKLKARFPCK |
| P14873 | 2357 | PPGLPVYLDL  | CYIPNHSNSKN   |
| Q99L47 | 208  | EEAAHDLALA  | CKLDYDEDASA   |
| Q15366 | 54   | GARINISEGN  | CPERIITLAGP   |
| Q8BMF4 | 290  | TRDVPLGAPL  | CIIIVEKQEDIA  |
| O94760 | 222  | LTVPDDIAAN  | CIIYLNIPNKGH  |
| P06213 | 1083 | NEASVMKGFT  | CHHVVRLLGVV   |
| Q62433 | 289  | TKTTLLKMAD  | CGGLPQISQPA   |
| Q9CQ65 | 130  | RPQTFYDGS   | HCSARGVCHIPM  |
| Q9CZB0 | 70   | KWSLPMALSV  | CHRGSIALSG    |
| P17987 | 236  | PKRIVNAKIA  | CLDFSLQKTKM   |
| P08551 | 323  | LKAKTLEIEA  | CRGMNEALEKQ   |
| Q9D880 | 249  | RDPARVVVVD  | CKKEAFRLQPF   |
| Q8BGC4 | 55   | FHEAVTLRRD  | CPVPLPGDGD    |
| Q64105 | 160  | SKTVVNISL   | LCALQPYKGWGL  |
| Q9JHK4 | 99   | VKAELGFLES  | CLRVNPKSYGT   |
| Q8JZN7 | 545  | APPGLSPAEF  | CRRHRLPAPAS   |
| P22460 | 331  | ADPFFIVETT  | CVIWFTFELLV   |
| P17182 | 119  | NAILGVSLAV  | CKAGAVEKGV    |
| P53041 | 404  | GRSISKRGVS  | CQFGPDVTKAF   |
| Q9CZ13 | 453  | DICKYFYDQ   | CPAVAGYGPIE   |
| Q91YT0 | 142  | RHDPHKLVEG  | CLVGGGRAMGAR  |
| Q60749 | 19   | SRLTRSSGRS  | CSDKPSGAHPS   |
| P62333 | 193  | LARAVASQLD  | CNFKVVSSSI    |
| O55222 | 346  | SMADVKFSFQ  | CPGRMYAPAWV   |
| P03899 | 39   | LYSEKANPYE  | CGFDPTSSARL   |
| Q9D6Y9 | 309  | GLNMFDTDS   | CYFHSGPRGTH   |
| Q99L85 | 95   | EGPLKALRSM  | CKRTDHGSVTI   |
| P17563 | 461  | LGPALAEHLR  | CPGGDCSSDIW   |
| P61758 | 113  | TRFLLADNLY  | CKASVPPTDKM   |
| Q9CQR4 | 40   | LVSAAPEKLI  | CEMKVEEQHTN   |
| P26443 | 112  | VRGILRIIKP  | CNHVLSLSFPI   |
| P47738 | 181  | SYTRHEPVG   | CGQIIPWNFPL   |
| Q9D024 | 215  | YNLWCSEGRV  | CEGMLIQLRFL   |
| P46471 | 377  | DIRFELLARL  | CPNSTGAEIRS   |
| Q924X2 | 305  | PVMALGMVPM  | CSYQMERMFNT   |
| O09161 | 53   | KQMLKRYDLL  | CLYHEPVSSD    |

---

---

|        |      |                        |
|--------|------|------------------------|
| P08249 | 93   | PEQLPDCLKGCDVVVIPAGVP  |
| Q91VT4 | 115  | HTNLLGSMILTCKAAMKTMIOQ |
| P29474 | 99   | QQDGPCTPRRCLGSLVFPKRL  |
| Q99JY0 | 436  | SLGHFPFATGCRMLVMAAANRL |
| Q921G7 | 265  | LYKKFDLRASCDAQTYGIGLK  |
| P61971 | 38   | QLGAIYIDASCLTWEGQQFQG  |
| Q8WTY4 | 92   | EMARILRPGGCLFLKEPVETA  |
| P19367 | 813  | ILQQGLNSTCDDSIKLVKTV   |
| P97478 | 137  | ALLGKEGAMACTVAVEESIAN  |
| Q02566 | 697  | DNPLVMHQLRCNGVLEGIRIC  |
| P20618 | 89   | VIGCSGFHGDCLTLTKIIEAR  |
| Q9CPY7 | 376  | EGRLILADALCYAHTFNPKVI  |
| O43447 | 131  | GCQFFITCSKCDWLDGKHVVF  |
| Q8TAT6 | 188  | GKFVALENISCKIKSGCEGHL  |
| Q8BH64 | 356  | HHISPGDFPDCQKMQELLMAH  |
| Q9WVQ5 | 75   | ERIQPEDMFVCDINEQDISGP  |
| Q9NX47 | 46   | RGSTKWVHQAQLQRWVDEKQR  |
| Q8BHP7 | 56   | TSEGSDCRCKCIMRPLSKDAC  |
| Q61425 | 201  | QKTFESLVDFCKTLGKHPVSC  |
| Q91VD9 | 367  | LLNKVDSNLCTEEIFPTEGA   |
| Q64105 | 172  | LQPYKGWGLYCAGKAARDMLY  |
| Q9CRB2 | 18   | PEESEAOAEGCSEERTYKELL  |
| P00441 | 7    | XXXXMATKAVCVLKGDPVQG   |
| P23284 | 202  | KPLKDVIIADCGKIEVEKPFA  |
| P06801 | 110  | IVYTPTVGLACQQYSLAFRKP  |
| Q9WUM3 | 345  | ARFYKLHERKCEPIVMTVPRK  |
| Q9D6R2 | 331  | FDHAAKIEAACFATIKDGKSL  |
| Q9CXA2 | 39   | GEPLRIVHAGCPEVAGPTLLA  |
| P62753 | 12   | KLNISFPATGCQKLVVDDER   |
| Q9WUM5 | 60   | IYIDKNTKIIICQFTGKQGT   |
| O94927 | 350  | QVLILGLRRCCLWTELKALHD  |
| P36578 | 208  | NRRRIQRRGPCIYINEDNGII  |
| Q9QUR6 | 57   | NKITVPFLEQCPVIRGLYKERM |
| Q99LC5 | 155  | VRTIYAGNALCTVKCDEKVKV  |
| Q99P30 | 223  | DFDLHDLIPSCERTFLWRYSL  |
| Q92616 | 1535 | AYCAPKQLSSCLPNIVPKLTE  |
| P30556 | 289  | IVDTAMPITICIAVFNNCLNP  |
| Q8BIQ5 | 150  | MFELMKQMKLCVQNSPQEAR   |
| P46660 | 54   | SRSNVASTAACSSASSLGLGL  |
| Q9D7B6 | 349  | QEEREDAVALCSMAKLFATEE  |
| Q3ULD5 | 167  | QEIALQNRLPDIYLVDSGGAN  |
| P17987 | 357  | QAEFVQERICDDELILIKNT   |
| Q99L04 | 10   | XMVAPMKGQVCVVTGASRGIG  |
| Q96I24 | 109  | QISRIQAESGCKIQIASSESSG |
| P51410 | 74   | RKELATVRTICSHVQNMIGV   |
| Q13347 | 144  | DNNEPYMKIPCNDKITSASVW  |
| P47857 | 114  | NLVKRGITNLVIGGDGSLTG   |
| P52480 | 358  | VANAVLDGADCIMLSGETAKG  |
| Q8TCG1 | 92   | QLAVDIETRDCLQNTYNLNSV  |
| P34914 | 230  | QFPEAPLPVPCNPNDVSHGYV  |
| Q9H9A6 | 264  | KLRFLPEFPCSLLKELHVGE   |
| Q9CZ13 | 268  | EEDAVPGLTPCRFTGSEIRHR  |

---

---

|        |       |                         |
|--------|-------|-------------------------|
| Q99KQ4 | 397   | LQKLTRDLLNCSFKCSYVVTN   |
| Q16555 | 504   | VPRGLYDGPVCEVSVTPKTVT   |
| P41216 | 221   | LEGVENKLTPCLKIIVIMDSY   |
| Q9DB27 | 113   | KFVLSGANIMCPGLTSPGAKL   |
| Q6PIE5 | 209   | ADLRIISSHGCKVDNSSLTGE   |
| Q8BFR5 | 222   | ETPVIVGSALCALEQRDPELG   |
| Q8VEM8 | 232   | QIPYTMMKFACFERTVEALYK   |
| Q9R112 | 361   | AQSGILDRTMCLIMKNQRPIK   |
| P25205 | 148   | RPKVVRVSVHYCPATKKTIERR  |
| Q99MN9 | 92    | MESDMFVEHRCADFGMAADKN   |
| O43143 | 190   | SLPGPKRGVACTQPRRVAAMS   |
| P50990 | 149   | AHEILPNLVCSSAKNLRDIDE   |
| A2ASS6 | 14760 | SEGKIHRLQICDIKPRDQGEY   |
| Q8BVI4 | 158   | GMAKGAVHQLCQSLAGKNSGM   |
| Q9EPL8 | 477   | SELGYMRARACWVLHYFCEVK   |
| P28271 | 165   | EFLKWGSQAF CNMRIIPP GSG |
| P56501 | 25    | VKFLGAGTAACFADLLTFPLD   |
| Q9CZ30 | 187   | KKLKPEYDIMCKVKSVIDQK    |
| Q8BVQ5 | 238   | RVSMVGQVKQCEGITSPEGSK   |
| P63104 | 189   | YEILNSPEKACSLAKTAFDEA   |
| Q7TNG8 | 369   | PGSKAYSTDV CVPI SRLPEIL |
| Q78J03 | 132   | ILRRLDTSLG CPRMEVVCKQC  |
| Q60597 | 956   | QKYPNAELAWCQEEHKNQGY    |
| Q9CQ62 | 116   | KTGNKVHAIRC DV RDPDMVHN |
| P17987 | 76    | EVEHPAAKVLCELADLQDKEV   |
| P80318 | 475   | SLRAKHTQES CETWGVNGETG  |
| P53811 | 230   | IFTNLHRQLFCWIDKWIDLTM   |
| P35579 | 896   | QEQLQAETELCAEAEELRARL   |
| Q9BUJ2 | 487   | WDVLIQOATQCLNRLIQIAAR   |
| P41216 | 275   | PPEPEDLAIICFTSGTTGNPK   |
| Q99J39 | 214   | PCEVLQKISECEAVHPVKNWM   |
| Q9NPH0 | 175   | NIFRNLESTRCLLAGLFOCQK   |
| Q921G7 | 117   | QIGAHTLSGACLDPAAFKELF   |
| P48039 | 127   | NITGIAINRYCYICHSLKYDK   |
| P13639 | 567   | CLKDLEEDHACIPIKKS DPVV  |
| P26599 | 250   | SLDGQNIYNACCTLRIDFSKL   |
| Q8BP48 | 174   | EEIDHAVHLACIARNCYPSPL   |
| P02730 | 317   | LLHSLEGFLDCSLVLPPTDAP   |
| Q9WUB3 | 784   | VFADYEEYIKQDKVSELYKN    |
| Q93092 | 250   | NTGEIKALAGCDFLTISP KLL  |
| P15105 | 183   | RDIVEAHYRACLYAGVKITGT   |
| Q922B2 | 130   | VRKVNQKIGSCTQODVELHVQ   |
| Q8BH95 | 111   | KEMQNRTFQDCYSSKFLSHWD   |
| P54136 | 369   | DGRKIVFVPGCSIPLTIVKSD   |
| Q91VT4 | 55    | ELGGNHIAFRCDVAKEQDVQS   |
| Q60936 | 638   | AMFEEAYSNYCRMKSGLQXXX   |
| Q99P88 | 1208  | LAECKLAVIHCAGYSDPILVH   |
| Q6PB66 | 112   | GLLQRVFESTCSSGSPGSNQA   |
| Q9JLZ3 | 113   | IIRSEVPGIFCAGADLKERAK   |
| P27816 | 635   | PETVTGTGKKCSLPAEEDSVL   |
| P62761 | 87    | DGTIDFREFICALSITSRGSF   |
| Q99JB8 | 421   | IGLYPANYVECVGAXXXXXXX   |

---



---

|        |       |                        |
|--------|-------|------------------------|
| Q60597 | 487   | SDDPEAVMYVCKVAAEWRNTF  |
| Q9EPB5 | 31    | WGSQKNPPVLC LHGWLDNANS |
| P52825 | 512   | IRPASIFTKRCSEAFVREPSK  |
| P13707 | 7     | XXXXMAGKKVCIVGSGNWGSA  |
| P31749 | 310   | IKDGATMKTF CGTPEYLAPEV |
| Q5SSW2 | 1343  | GRDKFSRRFCLFKGIFRNFD   |
| Q8VBT1 | 652   | SEGDSAVVPGCESREQPPPEV  |
| P54071 | 154   | GGTVFREPIICKNIPRLVPGW  |
| P46459 | 91    | SLYTFDKAKQCIGTMTIEIDF  |
| Q80UM7 | 136   | PGTPPKLRHTCEQGDGVGPYG  |
| Q99832 | 364   | GGERYNFFTGC PKAKTCTFIL |
| P70670 | 1820  | ANSNSASSPKCPDPSSKKDTK  |
| P12004 | 162   | SHIGDAVVISCAKDGVKFSAS  |
| P04117 | 118   | KRDGDKLVVECVMKGVTSTRV  |
| O70468 | 248   | EVSTKDKFDS CNFNLTVHEAI |
| Q32MW3 | 299   | EDTKLKSLDI CHPQERNVFNR |
| P98170 | 300   | YALGEGDKVKCFHCGGGLTDW  |
| P62879 | 204   | PDGRTFVSGACDASIKLWDVR  |
| P86048 | 105   | HVIRINKMLS CAGADRLQTGM |
| P10768 | 176   | YKSVSAFAPICNPVLCPWGKK  |
| P03995 | 291   | DYRRQLQALTC DLESLRGTNE |
| Q9JKS4 | 653   | LFHMEDGEPYCEKDYINLFST  |
| Q99MN9 | 271   | RAFDNDVDALCNLREFFNFLP  |
| P41216 | 510   | YLASKGEGEV CVKGANVFKGY |
| P21817 | 314   | SKAHTKATSF CFRISKEKLDV |
| P15121 | 299   | LLSYNRNWRV CALLSCTSHKD |
| Q9EQ20 | 86    | KAEMDAAVESCKRAFPWADT   |
| Q8BK64 | 56    | AVRVENEEGKCEVTEVNKLDG  |
| Q76MZ3 | 174   | AELRQYFRNLCSDDTPMVRRA  |
| Q9JHU4 | 4568  | VTGLKLQGATCSNNKLSLSNA  |
| Q8BKT7 | 59    | GRDYELYKYTCQELQRLMAEI  |
| Q9CXT8 | 389   | HVVQNEWKRLCTDVTSESEVAR |
| P62320 | 20    | LHEAEGHIVTCETNTGEVYRG  |
| Q9QY76 | 121   | PEDLMDSKLCV FELPAENAK  |
| P21980 | 371   | PQEKSEGTYCCGPVPVRAIKE  |
| Q9BXJ9 | 721   | CMIRLFNTAVCESKDLSDTVR  |
| Q9DCS9 | 125   | QREGENYQQNCAKELEQFTKV  |
| O75369 | 660   | AYGPGLEKSGCIVNNLAEFTV  |
| A2ASS6 | 33667 | TATNTAGSTSCQAHLOVERLR  |
| Q61768 | 65    | STSQEQVYNDCAKKIVKDVLE  |
| Q9HC38 | 221   | AAAFGRIAFSCPQKELPDLED  |
| Q8K2Y7 | 89    | EKVKSGASWTCQQLRNKSNE   |
| O43707 | 793   | GALGPEEFKACLISLGYDVEN  |
| P97823 | 144   | QKLAGVTALSCWLPLRASFSQ  |
| P09936 | 152   | AHDAVAQEGQCRVDDKVNHFH  |
| P50171 | 39    | LAAEGAAVAACDLGAAAQDT   |
| P24270 | 232   | LVNADGEAVYCKFHYKTDQGI  |
| P21817 | 252   | RLVYYEGGAVCTHARSLWRLE  |
| Q99NB1 | 144   | ITYRELLETT CRLANTLKRHG |
| Q8VC74 | 130   | AKRLNQEVAVCARQFGWSKRV  |
| P05063 | 290   | ASLNLNAINRCPLRPWALTF   |
| Q9Z1Q9 | 681   | PLLRPQWYVRCGEMAQAASAA  |

---

---

|        |      |                                         |
|--------|------|-----------------------------------------|
| Q8R127 | 77   | SLSSEVGVII <b>C</b> DISNPASLDE          |
| Q03265 | 294  | PLQYLAPYSG <b>C</b> SMGEYFRDNG          |
| P21980 | 336  | DKSEMIWNFH <b>C</b> WVESWMTRPD          |
| Q9Z1Q9 | 380  | RGETTLWNP <b>G</b> CDHAGIATQVV          |
| Q9ESD7 | 834  | VLFSRRGPSY <b>C</b> GRNCGKLQTI          |
| P00558 | 108  | DCVGPEVEKA <b>C</b> ANPAAGSVIL          |
| O70251 | 50   | AVSGPPPADL <b>C</b> HALRWYNHIK          |
| P24270 | 425  | QRSALEHSVQ <b>C</b> AVDVKRFNSA          |
| Q15149 | 3336 | PATYGELQQR <b>C</b> RPDQLTGLSL          |
| Q924M7 | 309  | TPKFIDVPTL <b>C</b> EMLNYTPSPS          |
| Q15185 | 40   | NFEKSKLTF <b>S</b> CLGGSDNFKHL          |
| P04843 | 477  | PAAEARMKVA <b>C</b> ITEQVLTLVN          |
| Q13868 | 68   | GSVERVNKLI <b>C</b> VKALKTRYIG          |
| P50991 | 410  | EAERSIHDAL <b>C</b> VIRCLVKKRA          |
| Q791T5 | 359  | YSPVFKSWIH <b>C</b> WKYLSVQQL           |
| O55222 | 428  | SPHVCKLMKI <b>C</b> MNEDPAKRPK          |
| P50990 | 430  | AKQITSYGET <b>C</b> PGLEQYAIKK          |
| Q9DCM0 | 34   | LLRQMFEPKS <b>C</b> TYTYLLGDRE          |
| Q99714 | 214  | PLLTSLPEKV <b>C</b> NFLASQVPFP          |
| P50396 | 317  | PIKNTNDANS <b>C</b> QIIIPQNQVN          |
| P19123 | 35   | DIFVLGAED <b>G</b> CISTKELGKVM          |
| Q1XH17 | 456  | PGPVYPIFDV <b>C</b> WHDKGKNAQP          |
| Q5U3K5 | 501  | AGHPRVAPQ <b>Q</b> CSEPETKWSST          |
| Q01320 | 391  | TLQAKSFG <b>S</b> T <b>C</b> QLSEKFIKAA |
| O08553 | 248  | RSITIANQ <b>T</b> N <b>C</b> PLYVTKVMSK |
| P10809 | 442  | VEEGIVLGG <b>G</b> CALLRCIPALD          |
| Q3ULD5 | 267  | AEDLGGADL <b>H</b> CRKSGVTDHYA          |
| P40124 | 29   | EAVSHTSDM <b>H</b> CGYGDSPSKGA          |
| P47934 | 449  | LAYYRIYG <b>Q</b> ACATYESASLRM          |
| Q9CY27 | 18   | IRDAKTREKL <b>C</b> FLDKVEPQAT          |
| P62717 | 64   | MKKSSGEIV <b>Y</b> CGQVFEKSPLR          |
| P19246 | 263  | AQAEARDAL <b>K</b> CDVTSALREIR          |
| Q9JL8  | 425  | RYGEVTSAS <b>N</b> CTDFQSRRLYI          |
| Q9WTI7 | 802  | RGFILRHSP <b>R</b> CPENAFFLDHV          |
| P30048 | 229  | FQYVETHGEV <b>C</b> PANWTPDSPT          |
| Q99873 | 262  | VEDLTFTSP <b>F</b> CLQVKRNDYVH          |
| P98170 | 90   | VGRHRKVSP <b>N</b> CRFINGFYLEN          |
| P10768 | 181  | AFAPICNP <b>V</b> LCPWGKKAFTSGY         |
| Q6PB66 | 483  | QETYINYV <b>F</b> PCFDSAQSVRAA          |
| P26443 | 327  | MRYLHRFG <b>A</b> KCVGVGESDGS           |
| P15105 | 359  | YAVTEAIV <b>R</b> TCLLNETGDEPF          |
| Q8BGK2 | 313  | ESGATGTI <b>A</b> GCLFGLLHGLAT          |
| Q8K3K7 | 248  | DADVTKLV <b>D</b> TCYQSMRATFLO          |
| Q9Y3B4 | 74   | YEDIFDAK <b>N</b> ADHLSGFNVCN           |
| Q8R2L5 | 91   | LSQFISP <b>F</b> T <b>G</b> CIYGRHITGLC |
| Q8BFR6 | 44   | LEHRSKDS <b>H</b> GCSEVNVKERP           |
| Q08752 | 275  | RAKLQPI <b>A</b> LSCVNLNIGACKLK         |
| P27348 | 94   | EKVESEL <b>R</b> SICTTVLELLDKY          |
| Q62095 | 297  | KFSYRSR <b>V</b> RPCVVYGGADTVQ          |
| A3KMP2 | 24   | LPLSTTS <b>N</b> EACKLFDATLTQY          |
| Q06830 | 52   | FFYPLD <b>F</b> TFV <b>C</b> PTEIIAFSDR |
| Q91Z53 | 57   | QGVVGA <b>H</b> GLLCRLSDRVDKKL          |

---

---

|        |      |               |             |
|--------|------|---------------|-------------|
| P53702 | 39   | CPMHKGQRKGC   | PVTAATSDLT  |
| Q12904 | 161  | DVSRLDLRIGCI  | IITARKHPDA  |
| P50990 | 148  | KAHEILPNLVCC  | SAKNLRDID   |
| P00505 | 187  | QGYRYYDPKTC   | GFDFTGAVED  |
| P14824 | 552  | SLETRFMTVLC   | TRSYPHLRRV  |
| Q8BU88 | 70   | EPRRPAEIIYHC  | RROIKYSKDK  |
| O55070 | 73   | MEIKDSSNNIC   | PMLMEKLNGN  |
| Q9CXT8 | 419  | LLQLDGSTPIC   | EDIGRQMLCY  |
| Q8TCG1 | 108  | NLNSVLAGVVC   | RSSHTDSVFL  |
| Q9R0Y5 | 25   | GGPGSGKGTQC   | EKIVQKYGYT  |
| P70349 | 38   | PAKII FEDDRCL | AFHDISPOA   |
| P62911 | 96   | EVLLMCNKSYCA  | EIAHNVSSK   |
| Q09666 | 1833 | EAEVPDVDLECP  | DAKLGPKF    |
| Q9D710 | 186  | IYADLSLKYNCS  | GLNFGKVDV   |
| P62258 | 98   | MVETELKLICD   | ILDVLDKHL   |
| Q9CZ42 | 104  | KVGADLTHVFC   | AAREAAPVIKS |
| P38060 | 141  | SELFTRKNANCS  | IEESFORFA   |
| Q9D967 | 138  | IIDVGRLGVTC   | IHIRDGMSLQ  |
| P62241 | 100  | LVRTKTLVKNCI  | VLIDSTPYR   |
| O95573 | 573  | GDIGEFEPDGC   | LKIIDRKKDL  |
| P19246 | 225  | QKKAQALQEECG  | YLRRHHQEE   |
| O70572 | 411  | DRGSEPHLAYC   | LQOEGDRAXX  |
| Q922B1 | 203  | LTDECRTLQNC   | ETGKAKITCG  |
| P68036 | 86   | HPNIDEKGQVCL  | PVISAENWK   |
| O08528 | 834  | TVVARRAAQLC   | GAGMAAVVDK  |
| Q8BGY2 | 38   | NGFVVLKGRPC   | KIVEMSTSKT  |
| Q9DB27 | 144  | IMAEGKQHALC   | VGVMKMSAED  |
| P53026 | 164  | TIKFQMKKVLCL  | AVAVGHVKM   |
| Q14498 | 478  | NSAQGNVYVKC   | PSIAAAIAAV  |
| P60842 | 66   | SAIQQRAILPC   | IKGYDVIAQA  |
| O08528 | 909  | KGAALITAVAC   | RIREAGQRXX  |
| Q91WJ8 | 144  | PDSGGLPERSC   | MLTGTPESVQ  |
| Q99497 | 53   | PVQCSRDVVIC   | PDASLEDAKK  |
| P06745 | 404  | LIHQGTKMIPC   | DFLIPVQTOH  |
| P31943 | 122  | FVRLRGLPFGC   | SKEEIVQFFS  |
| Q8BTM8 | 2293 | ISFEDRKDGSC   | GVAYVVQEPG  |
| Q8VDN2 | 518  | KGAPERILDRCS  | SILLHGKEQ   |
| Q8R010 | 306  | PTNVQRWLKSC   | ENLAPFSTAL  |
| O15400 | 28   | ISSNIQKITQCS  | VEIQRTLNO   |
| Q8R0F8 | 132  | WTLAKSFTSSC   | PVSAFVPKEK  |
| Q7TPV4 | 896  | ARRYCHEVGP    | CAEALHAQVER |
| Q9DC61 | 465  | THSRKLPHELCT  | LIRNVKPED   |
| O88441 | 246  | VKNYSNLLAF    | CRRIEQHYFED |
| Q9DB29 | 173  | ANACLQVARD    | CGTDVLDLWTL |
| P22087 | 99   | EPHRHEGVFI    | CRGKEDALVTK |
| Q8BGH2 | 457  | PMGVQGGDRIC   | DGVQFGAGIR  |
| Q8K4F5 | 127  | GLLPQLGLVPC   | VLVGHSMGGK  |
| Q99JY0 | 459  | DGGQYALVAAC   | AAGGQGHAMI  |
| Q99LC3 | 112  | RPLDIEFSGCS   | SLEKFYDDPK  |
| Q00839 | 562  | LNTLLQRAPOC   | LGKFIEIAAR  |
| Q9BUJ2 | 377  | ALYPHVLVKNCA  | VEFNFGQRA   |
| Q80XM9 | 95   | ILTMLLMLKLC   | TEVRVANELN  |

---

---

|        |      |                                                           |
|--------|------|-----------------------------------------------------------|
| P50171 | 192  | ARELGRHGIR <b>C</b> NSVLPGFAT                             |
| Q9CXA2 | 310  | SSATGSVFTG <b>C</b> AVREAKCGDF                            |
| Q8K0Z7 | 231  | EEEKNLFKFI <b>C</b> DASSLHQVRK                            |
| O08573 | 325  | FKVAVNGQHM <b>C</b> EYYHRLKNLQ                            |
| Q9DCX2 | 101  | DQEEKEDVKS <b>C</b> AEFVSGSQLR                            |
| Q9CRA7 | 96   | KIQAIDATDS <b>C</b> IMDIGLDHNV                            |
| P26196 | 324  | AYVTERQKVH <b>C</b> LNLTFSRLQI                            |
| Q01320 | 996  | KVFKLQSSLT <b>C</b> NSMVLFDHVG                            |
| P21980 | 285  | GQCWVFAAV <b>A</b> CTVLRCLGIPT                            |
| Q9CPZ8 | 31   | KIIREKARER <b>C</b> SEQVEDFTRC                            |
| P98156 | 120  | MRTCRINEIS <b>C</b> GARSTQCIPV                            |
| P54071 | 418  | SGAMTKDLAG <b>C</b> IHGLSNVKLN                            |
| Q9Z1Q5 | 223  | AYAREEF <b>A</b> ST <b>C</b> PDDEEIELAY                   |
| Q99MR8 | 450  | RQSALSKLRY <b>C</b> LHQYNIVGLR                            |
| P08752 | 326  | DTKEIYTHFT <b>C</b> ATDTKNVQFV                            |
| P68040 | 240  | LDGGDI <b>I</b> NAL <b>C</b> FSPNRYWLCA                   |
| Q8BKC5 | 972  | TKENVNATEN <b>C</b> ISAVGKIMKF                            |
| Q02566 | 1413 | EEAVEAVNAK <b>C</b> SSLEKTKHRL                            |
| Q9D6R2 | 222  | LQKCREVAEN <b>C</b> KDIKFNEMYL                            |
| P21817 | 1590 | QSERKNPAP <b>Q</b> CP <b>P</b> RLEMQMLM                   |
| Q5SW19 | 734  | FSPGVRFPES <b>C</b> QDEVDRQKQL                            |
| Q501J6 | 168  | PYLERGDG <b>P</b> I <b>C</b> LVLAPTRELA                   |
| Q80X90 | 1868 | IEGPSKAEIS <b>C</b> IDNKDGTCTV                            |
| Q8BMS1 | 470  | KEVESVTPEH <b>C</b> IFASNTSALP                            |
| Q6P8J7 | 238  | FDKPVSP <b>L</b> LT <b>C</b> AGMARDWPDA                   |
| P05063 | 202  | LPDGDHDLK <b>R</b> C <b>Q</b> YVTEKVLAA                   |
| Q61699 | 642  | RNDAKNAVEE <b>C</b> VYEFDRDKLGG                           |
| P12970 | 182  | ALCRKMGV <b>P</b> Y <b>C</b> I <b>I</b> KGKARLGH          |
| Q9R0H0 | 559  | RAVQAVLRN <b>L</b> CLLYSLYGISQ                            |
| Q8C5H8 | 321  | EKQKSSGLN <b>L</b> CTGTGSKAWSF                            |
| Q99KC8 | 374  | LGGTEILT <b>P</b> L <b>C</b> NIYKASSIPG                   |
| Q8BIG7 | 133  | ALPEAGRV <b>V</b> T <b>C</b> EVDAEPPKLG                   |
| Q14315 | 1103 | GGLGLTVEGP <b>C</b> EAKIECQDNG                            |
| P04083 | 343  | GDYEKILVAL <b>C</b> GGNXXXXXXXX                           |
| P15105 | 209  | PAQW <b>F</b> Q <b>I</b> GP <b>C</b> EGIRMGDHLW           |
| P30153 | 390  | VRLNIISN <b>L</b> D <b>C</b> VNEVIGIRQL                   |
| P97461 | 66   | YAAKRFRKA <b>Q</b> CP <b>I</b> VERLTNSM                   |
| P80315 | 252  | EKAKIGLI <b>Q</b> F <b>C</b> LSAPKTDMDN                   |
| Q9D172 | 50   | GARVALVLS <b>G</b> CGVYDGTEIHE                            |
| P26599 | 251  | LDGQNIYN <b>A</b> CT <b>L</b> RIDFSKLT                    |
| P61080 | 85   | HPNINSNGS <b>I</b> CLDILRSQWSP                            |
| P27546 | 595  | QHKGQSTV <b>P</b> P <b>C</b> TASPEPVKAA                   |
| Q91VH6 | 58   | PHAGYTYCG <b>S</b> CAAHAYKQVDP                            |
| P13010 | 339  | EOMKYKSEG <b>K</b> CF <b>S</b> VLGFCKSS                   |
| P63330 | 269  | IFSAPNYCY <b>R</b> CG <b>N</b> QAAIMELD                   |
| P35486 | 41   | ANDATFEI <b>K</b> CDLHRLEEGPP                             |
| P49915 | 449  | PGPGLAIR <b>V</b> I <b>C</b> AEEPYICKDF                   |
| Q8VE38 | 240  | LVHEFPEK <b>I</b> CS <b>S</b> FHVTKQTAQ                   |
| Q7TPV4 | 890  | MHHLCRARR <b>Y</b> C <b>H</b> EVGP <b>C</b> A <b>E</b> AL |
| P30101 | 244  | KFIQENIF <b>G</b> I <b>C</b> PHMTEDNKDL                   |
| Q8BTM8 | 1997 | VVPPSGRE <b>E</b> P <b>C</b> LLKRLRNGHV                   |
| Q9JIK5 | 585  | IPEVDLVV <b>Q</b> S <b>C</b> PPKDVESYIH                   |

---

|        |      |                                |
|--------|------|--------------------------------|
| Q8BH59 | 435  | PLPAEILAGG <b>C</b> AGGSQVIFTN |
| O35737 | 290  | GSTFQSTTGH <b>C</b> VHMRGLPYRA |
| Q60597 | 604  | TLDGQPRSMT <b>C</b> PSTGLEEDVL |
| Q8BW75 | 26   | GMAAAKLLHD <b>C</b> GLSVVVLEAR |
| P07355 | 133  | TDEDSLIEII <b>C</b> SRTNQELQEI |
| P24270 | 460  | VLNEEERKRL <b>C</b> ENIAGHLKDA |
| Q99JR6 | 133  | SAALPELKLL <b>C</b> GADVLKTFQT |
| O70468 | 715  | EEWVFDKLL <b>C</b> ETEGRVRVET  |
| Q8R1G2 | 198  | STLTQKLKEH <b>C</b> IVNYQVKTF  |
| Q91VI7 | 404  | SLRELDLSNN <b>C</b> MGGPGVLQLL |
| Q15149 | 950  | MRGRLPLLAV <b>C</b> DYKQVEVTVH |
| Q91WS0 | 83   | RCWRSKKFPF <b>C</b> DGAHIKHNEE |
| Q00610 | 918  | YCEKRDPHLA <b>C</b> VAYERGQCDL |
| P06151 | 293  | INEDVFLSVP <b>C</b> ILGQNGISDV |
| Q8QZR5 | 254  | NPTGQVQTR <b>C</b> IEAVIRFAFE  |
| Q8R016 | 164  | VEKYGVVPPK <b>C</b> FPESHTTEAT |
| Q8CC88 | 1415 | RTNATPRHNN <b>C</b> VTLTHTNQVV |
| P10620 | 50   | TRKVFANPED <b>C</b> VAFGKGENAK |
| Q8BFQ4 | 287  | LDGKHTGPIT <b>C</b> LQFNPKFMTF |
| P56546 | 44   | PLVALLDGRD <b>C</b> TVEMPILKDL |
| P80313 | 370  | FFTGCPKAKT <b>C</b> TIILRGGAEQ |
| Q9QUM9 | 47   | LTSVAVRGKD <b>C</b> AVIVTQKKVP |

Negative dataset  $S_L^-$  contains 2300 non-SNO sites and peptide fragments

| Uniprot ID | Site  | Sequence                                                |
|------------|-------|---------------------------------------------------------|
| Q8BMS1     | 97    | SAVLISSKPG <b>C</b> FVAGADINML                          |
| Q9D892     | 154   | RGSRDFGWDP <b>C</b> FQPDGYEQTY                          |
| B1AR13     | 70    | ELVAGKTYRW <b>C</b> VCGRSKNQPF                          |
| Q497Q6     | 228   | VPMSYIESEF <b>C</b> KKSRXXXXXX                          |
| Q8BMS4     | 238   | HVSHLEMF <b>I</b> Q <b>C</b> CYQVLKPGGS                 |
| Q64702     | 422   | DENQHSSNH <b>H</b> CLGKTPFPFAD                          |
| Q9D0K2     | 28    | RSSRGALHKG <b>C</b> VCFYSVSTRH                          |
| Q9Y272     | 24    | DSELSIPAKN <b>C</b> YRMVILGSSK                          |
| Q9CZC8     | 186   | AAERITEGVR <b>C</b> ICNHLSLATK                          |
| A8C756     | 535   | TWVFPVLSVL <b>C</b> GGNLDQRSYV                          |
| Q9WU78     | 691   | TEILVRFQNK <b>C</b> SDIVFARKTE                          |
| Q99MK8     | 208   | GRGGFGEVYG <b>C</b> RKADTGKMYA                          |
| P19838     | 703   | VEHDNISLAG <b>C</b> LLLEGDAHVD                          |
| O08715     | 444   | NPRGDDNFV <b>A</b> CMANNQS SVLS                         |
| A2ASS6     | 30880 | WTKGDKELDL <b>C</b> EKISLQYTGK                          |
| P54886     | 183   | YEAMFTQYS <b>I</b> CAAQILVTNLD                          |
| P12382     | 518   | VEARGRYEEL <b>C</b> IVMCVIPATI                          |
| Q6PDN3     | 669   | FEQKGGWHS <b>L</b> CIQEVFPEDTG                          |
| P04350     | 201   | QLVENTDETY <b>C</b> IDNEALYDIC                          |
| P70398     | 1340  | QVAQEQFF <b>L</b> M <b>C</b> TRCCMGRPL                  |
| Q15149     | 850   | QWSWMLQL <b>C</b> CEAHLKENAA                            |
| O55229     | 53    | RDAQRRAYQ <b>W</b> CREYLGGAWRR                          |
| P78347     | 123   | RKTVEDYFC <b>F</b> CYGGKALGKSTV                         |
| P78527     | 2248  | IKTLVECWKD <b>C</b> LSIPYRLIFE                          |
| Q64467     | 29    | DRCP <b>C</b> PC <b>C</b> PC <b>C</b> PC <b>P</b> VIRPP |
| O00468     | 488   | TCAVKNGQ <b>A</b> ACECLOACSSLY                          |

---

|        |       |                            |
|--------|-------|----------------------------|
| P54310 | 418   | DL LGSTGERI C LAGDSAGGNL   |
| P70388 | 1296  | FYRVKKNMDQ C SEIVKCSISS    |
| Q9JKS4 | 606   | RCYEQFFAPI C AKCNTKIMGE    |
| O15355 | 495   | APDTSGDGTG C DNMTCI I ICF  |
| A2ASS6 | 22724 | TYKVTGLTEG C EYFFRVMAEN    |
| P98156 | 84    | ESDFVCKNGQ C VPNRWQCDGD    |
| Q9R1V6 | 692   | AGTVCSGNGV C SNEKVCVNR     |
| Q6P3A8 | 28    | GAERRRCLR C AALVQGFLOP     |
| Q8VDQ1 | 180   | LAGQIGHLLG C SRVVGICGTQ    |
| Q6P2B1 | 248   | SSNLHEAASD C VCSALYAIEN    |
| A2ASS6 | 6333  | IKAGDSARLE C KITGSPEIQV    |
| P25205 | 123   | PRTLTSFCFLS C VVVEGIVTK    |
| Q8BFP9 | 17    | LRGGTSVRPL C AVPCASRSLA    |
| Q8WX93 | 1086  | MAANPQGRIS C TGRLMVQAVN    |
| Q14498 | 303   | YGFITFS DSE C AKKALEQLNG   |
| Q9P2E9 | 1216  | EKHMAAASAE C QNYAKEVAGL    |
| Q9EPL8 | 567   | DLTNVIQKMI C EYSEEVTPIA    |
| Q9JHU4 | 790   | IESVRTYERT C EKVEERNTIS    |
| O70433 | 224   | CDLYAKKCAG C TNPI SGLGGT   |
| Q810L3 | 306   | KMEETLTCI I C QDLLHDCVSL   |
| Q3UH68 | 1019  | FHIQCFRCGI C KGQLGDAVSG    |
| Q9D1G3 | 90    | LSGHVLF AKL C TMVAPQLRSW   |
| Q9DC61 | 87    | VASQNKFGQF C TVGILINSGS    |
| P62702 | 181   | DFIKFDTGNL C MVTGGANLGR    |
| Q5VYK3 | 1638  | NVKYKIVAI S C AADILKATKE   |
| A8C756 | 1722  | ELQGTLSLWR C VLTLLQSEEQ    |
| Q8K411 | 313   | WDKPREFHIT C GPDSLATETA    |
| Q6P2B1 | 527   | SAAAKAIHNI C SVCRDHMAQH    |
| O70433 | 101   | DCYSNEYSSK C QECKKTIMPG    |
| Q9CR68 | 236   | ANAGDFGGY C PCHGSHYDAS     |
| P26039 | 1939  | ALVTKAGALQ C SPSDVYTKKE    |
| P97823 | 173   | DISVLQCHGD C DPLVPLMFGS    |
| Q9D172 | 175   | HGAKKPIGL C CIAPVLAAKVI    |
| P53569 | 421   | RKHPNMKG VV C GEIERLLFRS   |
| Q8BP48 | 22    | DGCSSEAKLQ C PTCIKLGIQG    |
| Q91YR7 | 339   | RNLIMKGTEM C PKSEDVWLEA    |
| P46459 | 334   | I I I FDEIDAI C KQRGSMAGST |
| Q99K43 | 209   | DVVCEDESAF C LSLENIATLQ    |
| A3KMP2 | 376   | QLAKDVGLPL C QALLEAENGN    |
| P19838 | 666   | HLAMMSNSLP C LLLLVAAGAD    |
| P13639 | 751   | MEPIYLVEIQ C PEQVVGGIYG    |
| Q8BWM0 | 109   | LQLTLYQYKT C PFCSKVRAFL    |
| Q5VYK3 | 1722  | CYRQELCKLM C ERCLKLSTWKV   |
| Q9JKS4 | 550   | ASSRTPLCGH C NNVIRGPFLV    |
| Q8K4Q0 | 1047  | CIAVADKDSI C FWDWEKGEKL    |
| Q8JZN7 | 506   | DSSDPKTFVHCATIYKRYMD       |
| P54136 | 8     | XXXMDVLVSE C SARLLQEQEE    |
| Q9Y696 | 35    | AGSDGESIGN C PFSQRLFMIL    |
| Q9JL8  | 328   | LPVRMVCAS T C YRAETDTGKE   |
| P98156 | 212   | TSSCIPLSWV C DDDADCSDQS    |
| Q8K298 | 1114  | VDIRLWQPDAC YKPVGKPXXX     |
| P27695 | 99    | PDILCLQETK C SENKLP AELQ   |

---

---

|        |       |                        |
|--------|-------|------------------------|
| Q00987 | 2     | XXXXXXXXXXMCNTNMSVPTDG |
| Q8JZN7 | 488   | SLLDTSLDTTCDVACL MFDSS |
| O00468 | 494   | GQAACECLQACSSLYDPVCGS  |
| P00533 | 215   | ENCQKLTKIICAQOC SGRCRG |
| P26196 | 385   | RVFHDFRNGLCRNLVCTDLFT  |
| Q9Z2W0 | 269   | PRLDNLHSCFCALQALIDSCA  |
| O89103 | 464   | GWELAPNGVFC SRGTVFSELP |
| Q3UHX9 | 270   | YWG YTVRLASCLSAVFAEAPF |
| Q9CQ60 | 156   | ILGVGPDGHTCSLFPDHPLLO  |
| P48725 | 1688  | HVASIGCANPCADDELEQEGV  |
| O60610 | 437   | RPQYYKLIEECISQIVLHKNG  |
| A2ASS6 | 19651 | RINKDELIRQCAF RVPGLIEG |
| Q12879 | 460   | MNVKKCKGFCIDILK KLSRT  |
| P52825 | 13    | PRLLLRDWPRCPSLVLGAPSR  |
| Q6PAR5 | 1167  | LMAQLQETMRCVCRFDNRTCR  |
| Q8R5A6 | 456   | EGFSHFHLYVCAAFLVRWRRE  |
| Q99JR6 | 163   | QEIVEKFGLVCVSRSGHDPER  |
| Q8C7H1 | 48    | GALPNCFGHHC TKRVLLSDGF |
| Q9R0Q7 | 76    | HKRTDRSILCCLRKGESGQSW  |
| A2ASS6 | 27041 | RKAYATITNNCTKN TFKIENL |
| O00468 | 447   | DSDCWROQAECRQQRAIPSKH  |
| P38060 | 174   | VRGYVSCALGCPYEGKVSPAK  |
| Q9EST5 | 114   | STLEPLKRLDCLKSLDLFGCE  |
| Q9JI57 | 480   | WSDMSSVSEDCGPGTSGEIAM  |
| Q01320 | 215   | LKPFSGEDYTCITFQPDLSKF  |
| P08752 | 287   | EKITQSSLTICFPEYTGANKY  |
| P15105 | 42    | WVDGTGEGLRCKTRTLDCPEK  |
| Q9JL8  | 324   | AFRDLPVRMVCASTCYRAETD  |
| P16546 | 1930  | TVHKDRVNDVCTNGQDLIKKN  |
| Q9BSK1 | 188   | RTERGEKPHGCGECGKTFMRK  |
| Q8R1B4 | 750   | KAMKMGDWKTCHSFIINEKMN  |
| Q99683 | 226   | MITPHNKVYCCDSSFMKGLTE  |
| Q60597 | 215   | EIIRRLEMAYCQHIGVEFMFI  |
| Q3UKJ7 | 383   | VKIWNMKTTECSNTFKSLGST  |
| A2ASS6 | 17608 | EVFIDIGAQDCLVCKAGSQVK  |
| Q80UJ7 | 117   | MNNDFP PRAHCLVRWYGLREF |
| Q4VXU2 | 232   | VMRDNSGHSRCFGFVNFEKHE  |
| P12277 | 74    | PGHPYIMTVGCVAGDEESYEV  |
| P12277 | 146   | SIRGFCLPPHCSR GERRAIEK |
| Q9ER72 | 138   | QDGKVTWYCCGPTVYDASHM   |
| Q9BXJ9 | 20    | ENALFKRILRCYEHKQYRNGL  |
| P47712 | 220   | KALYESGILD CATYVAGLSGS |
| P98170 | 227   | WSEHRRHFPNCF FVLGRNLNI |
| O75694 | 102   | ELVEQFGHMQCNCMMGVFPPI  |
| Q9CQA3 | 198   | CILCACCSTSCPSYWWNGDKY  |
| Q8NBI5 | 382   | TSLLCLGFALCASVPILPLOY  |
| A2ASS6 | 6853  | IDISQSGEYTCVVSNNAGQAS  |
| Q99JY0 | 29    | ALRSSIRPLSCSSQLHSAPAV  |
| Q91W97 | 133   | GTELFDYVADCLADFMKTKNL  |
| Q3U1J4 | 604   | TTFESSHYLLCALGDGALFYF  |
| A2ASS6 | 14145 | CTPEDIKTYTCDAKDFKTS CN |
| Q9EQ80 | 253   | LLLHTGMGRLCTLDES VSLAI |

---

---

|        |       |                          |
|--------|-------|--------------------------|
| Q8BIF0 | 11    | MVARLTAFLVCLVFSLATLVQ    |
| Q5VYK3 | 1768  | EALAEILLETCKSITYSLENK    |
| Q64727 | 85    | PPAFIKVENACTKLVQAAQML    |
| Q61598 | 203   | RTDDYLDQPC CETINRIKLYS   |
| Q9Z2I0 | 71    | YLCFKGEPLSCWTQRPECQGT    |
| Q3TL44 | 5     | XXXXXXMRWGC HLPRTSWGSG   |
| P39053 | 708   | FSELLANLYSCGDQNTLMEEES   |
| A2ASS6 | 1868  | VLEGETARFR CRVTGYPPQKV   |
| Q8R2L5 | 137   | DPAYLKDPRVCNIRYREXXXX    |
| Q8BK08 | 116   | SLPAGVLSLACTLYGISWQF     |
| O70145 | 513   | GIFPKAFVEGCAAKNLEGIPR    |
| Q9Z1W9 | 111   | VAIKRINLEK CQTSMDELLKE   |
| A2ASS6 | 28120 | KKAWVSVTNN CNRLSYKVTNL   |
| Q9JHU4 | 3710  | TVTRSSLQSQCLNEVLKAERP    |
| O95372 | 147   | HPLAGIVALSCWLP LHRAFPQ   |
| Q9D051 | 169   | SQCFAAWYGHCPGLKVVPWN     |
| Q791V5 | 268   | YSPIYTSWIDCWMLQKAGNM     |
| Q86VP6 | 206   | I IALGHLVMS CGNIVFVDLIE  |
| Q9D8B4 | 115   | THSYGTAAMGCVYMGTAALF     |
| Q9DAS9 | 69    | SENPFKDKKTCI I LXXXXXXXX |
| A8C756 | 1859  | GWQSPHSQKLC H LQRIASEQS  |
| Q9UHG3 | 242   | NAFVGAVSLS CSDSGLWAVEG   |
| Q99MK8 | 154   | DLFQPYIEE I CQNLRGDVFQK  |
| P02463 | 39    | GDCGGSGCGKCDCHGVKGQKG    |
| Q8R349 | 72    | SRKLDKLYEACRYLAARCHYA    |
| Q13144 | 95    | ATGVQETFVFC CWKAAQIKEH   |
| P78527 | 2363  | QNTMEDKFIVCLNKVTKSFPP    |
| Q62407 | 1682  | RRGLVIVTELC TEELLERMAR   |
| P42574 | 220   | KDGSWFIQSLCAMLKQYADKL    |
| P14780 | 674   | VFQYREKAYFCQDRFYWRVSS    |
| Q91YE3 | 279   | INGRTKAMVACYPGNGTGYVR    |
| Q9CZC8 | 235   | VFSPADDRLDCCAGQDSLEKQ    |
| Q9D710 | 127   | LTLCIVFLMTCKPPLYMGPEY    |
| P06213 | 286   | QDWRCVNF SFCQDLHHKCKNS   |
| Q923E4 | 494   | RLGGEYAKLCCNPVKLSEITE    |
| Q3UZY0 | 300   | HRATVLQIHFC DWQAWAWEWRQ  |
| P32020 | 288   | YDMSKEAARRCYEKSGLTPND    |
| A8C756 | 1752  | VTTAMSQGNTCQSTEF AFCQV   |
| Q99JW4 | 196   | DKMGVPICGACRRPIEGRVVN    |
| Q9D517 | 109   | EIDFLCGWTMCERFGVLGSSK    |
| P14618 | 317   | FLAQKMMIGRCNRAGKPVICA    |
| O70572 | 358   | EEAREVAIILCIPSVGLVLVA    |
| Q5SSW2 | 201   | EMLEEWRPLMCPFDVTMOKAI    |
| O95372 | 213   | KTYPGVMHSSCPQEMAAVKEF    |
| A2ASS6 | 3535  | VAKLSVTVTGCPKPKIQWFFN    |
| P84095 | 6     | XXXXXMQSIKCVVVG DGAVGK   |
| Q8CHP8 | 297   | EDVKSNOESDCMFKKKMVPDF    |
| Q06587 | 87    | LRSKNKECPTCRKKLVSKRSL    |
| A6H611 | 376   | ERYNIEPSLYCPFLSLGACME    |
| Q91YT0 | 385   | KHESCGQCTPCREGVDWMNKV    |
| P23368 | 190   | PVGKLCCLYTACAGIRPDRCLP   |
| P25205 | 126   | LTSCFLSCVVCVEGIVTKCSL    |

---



---

|        |       |                        |
|--------|-------|------------------------|
| Q14315 | 535   | VREAGDGVFECEYYPVVPGKY  |
| P48725 | 758   | LEEQLQKKESCHREMLTQELE  |
| O60502 | 863   | DPSVAKSMMA CLLSSLKANGS |
| O00468 | 1597  | DEKSPCQPNPCHGAAPCRVLP  |
| Q9QUR6 | 410   | SFLSPGVIYHCDLTKEELEPM  |
| Q9CZW5 | 217   | KECLEDTVAVCILEGFQNEQS  |
| Q16665 | 255   | RHSLDMKFSYCDERITELMGY  |
| Q9CXJ4 | 91    | PAVLWQHPRCLIALCEAKES   |
| Q9QYJ0 | 202   | EGEVINEKDRCKKCEGKKVIK  |
| Q9ET80 | 402   | DQAALAAARQCDIARAVAREL  |
| A2ASS6 | 33564 | VARNKHGEDSCKAKLTVTLHP  |
| Q6NXE6 | 206   | CSGIRCVRHACLKHEQNRQDL  |
| Q8TAQ2 | 486   | NPQEYLTSTACRRNLAGDVCA  |
| Q64462 | 330   | TTSGISWFLYCMALYPMHQOR  |
| Q9D1G3 | 382   | FVVTTLWLGP CDIVYLSVLN  |
| P70398 | 471   | SPEQLDHLFD CFKASWTNASK |
| Q9DCD0 | 171   | AAKVGTEGPCD WVGDEGAGH  |
| Q6A0A9 | 1097  | HLNALSTDSACRREAALAAV   |
| P11142 | 17    | VGIDLGTTYS CVGVFQHGKVE |
| P97822 | 27    | EEVTELVLDNCLCVNGEIEGL  |
| Q99798 | 126   | SKVAVPSTIHC DHLIEAQVGG |
| Q9D883 | 155   | SPVTDFREACCRQYEMGECTR  |
| P28650 | 339   | WGVTTGRKRRCGWLDLMILRY  |
| A2ASS6 | 4698  | VKVDDSGTYSCEATNDVGS DS |
| Q12879 | 1412  | RSSLRSTASYCSRDSRGHNDV  |
| Q62407 | 1057  | KLSTAKDELTC SARLTVRPSL |
| Q9BQG0 | 623   | SCDLLGDIQTCIRKSLGEKPR  |
| P14873 | 143   | RHKLLVLTGQCFENTGELILO  |
| P61978 | 205   | IGGKPD RVVECIKIILDLISE |
| P62753 | 100   | GERKRKSVRG CIVDANLSVLN |
| Q8K0S0 | 250   | APKGS LGDRFCRDRLPLLDIA |
| Q9H9Q2 | 178   | NNIVKTLHEWCDGCEAVLLGI  |
| Q9JMA1 | 122   | NTCYMNATVQCIRSVPELKDA  |
| Q62407 | 1661  | ARLLARLQHGCVLYFHEAFER  |
| O60610 | 314   | SGTTIALKVGCLQLINALITP  |
| P21817 | 844   | RGPHLVGPSRCLSHTDFVPCP  |
| Q9CQN1 | 657   | NPRHTLIKKL CQLRESEPELA |
| Q14139 | 202   | PENLLPFAVQCRNLTVSNTRT  |
| P68404 | 409   | KPPFLTQLHSCFQTMDRLYFV  |
| O00429 | 300   | NRLLMHHIRDCLPELKTRINV  |
| Q64277 | 150   | ENASGLDYQSCPTSEDCENNA  |
| Q9ER60 | 145   | MFIMITILTNCVFMTMSNPPS  |
| P09382 | 3     | XXXXXXXXMACGLVASNLNLK  |
| Q9JLV5 | 298   | LKNGKTEDLACMYKLSRVPN   |
| Q62312 | 486   | ALVLWEMTSRCNAVGEVKDYE  |
| Q99KN2 | 142   | WEVDEEDEYECVSVLSSHTQD  |
| Q9CXT8 | 342   | NLSSKLAQLTCHGNLCHSFQS  |
| P47757 | 147   | AGDGSKKIKGCWDSIHVVEVQ  |
| P13639 | 388   | DDEAAMGIKSCDPKGPLMMYI  |
| O95219 | 318   | LFYAEALRAVCRKHELMQYDL  |
| Q00987 | 441   | PLNAIEPCVICQGRPKNGCIV  |
| Q14181 | 259   | EPVTLLGQIGCDSNGKLNKS   |

---

---

|        |       |                         |
|--------|-------|-------------------------|
| P70388 | 680   | ITQLTDENQSCCPVCQRFVQT   |
| P31327 | 761   | KNVVSQKTSACFEPQLDYMVT   |
| P21817 | 2158  | SVEDTMSLLECLGQIRSLIV    |
| Q9BSK1 | 303   | TGDKPYKCSDCGRTFYFKSDL   |
| P43235 | 221   | MYNPTGKAAKCRGYREIPEGN   |
| Q810L3 | 476   | SLPTAAPDYMCPPLQSHAICT   |
| Q9H2U2 | 283   | QCWKALLMKKCNNGAINCTNV   |
| Q9JLJ2 | 220   | QGGAAATGQFLCHHREVAKISF  |
| Q9D1C3 | 6     | XXXXXMLSATCRRRLAPALRRL  |
| Q14444 | 257   | DSTHNHQNGLCHEEEAASAPA   |
| P26639 | 558   | IKDAIGRYHQCATIQDLDFQLP  |
| P62918 | 90    | EGIHTGQFVYCGKKAQLNIGN   |
| Q06203 | 237   | TEGWVVSSES CSFLSIGARYY  |
| Q9Y570 | 347   | GKFQMQVLPQCGHAVHEDAPD   |
| P00533 | 1146  | PEYLNTVQPTCVNSTFDSPA    |
| P21333 | 483   | TVGQACNPSACRAVGRGLQPK   |
| P07742 | 790   | SLENREECLMCGSXXXXXXXXXX |
| Q9BUJ2 | 218   | DTLVAIDTYNCDLHFKVARDR   |
| O08715 | 392   | EALPPKTYVSLSSPLSGPTK    |
| P53996 | 102   | KREREQCCYNCGKPGHLARDC   |
| P16675 | 235   | NRLWTSLQTHCCAQNKCIFYD   |
| Q9ESD7 | 1716  | LRPSQLLHLFCQQHRIKAPVY   |
| Q5UIP0 | 2450  | QLFEMHEKLS CMANSVIKNLQ  |
| Q8TEX9 | 95    | LTALQRETEHCVSLSLAQLSA   |
| Q5UIP0 | 880   | KLDEVPKVYSCLNKLEKLLG    |
| P54822 | 113   | AGIIHLGATSCYVGDNTDLII   |
| Q8VEM8 | 252   | KFVVPKPRSECTKAEQLVVT    |
| Q8VC74 | 323   | TPYRDLSAAFCAKFLSRKRX    |
| Q9ER60 | 1562  | ENPGTNIKGD CGNPSIGICFF  |
| A2ASS6 | 21103 | LLTVKAGTNVCLDATVFGKPM   |
| O08715 | 461   | SVLSVSSLGQCSDPVSTSGLE   |
| Q99MR3 | 278   | ASVFAVLFNGCTGIMAGANMS   |
| Q9QYJ0 | 146   | QLSKNVLC SACSGQGGKSGAV  |
| Q920E5 | 117   | DSSLTRRGQICWYQKPGIGLD   |
| Q9EPL8 | 878   | LFNGLKRAYACHAEHENDSDD   |
| P50579 | 223   | LNAGLAFPTGCSLNNCAAHYT   |
| P15170 | 276   | GANLKEQSDFCPWYIGLFPFIP  |
| Q9NPA8 | 50    | CGWKDQLKAHCKEVIKEKGLE   |
| Q9UL62 | 918   | EVQGAAQSSE CPLACSSSLHC  |
| Q9DCN1 | 337   | MQVIHPDGTKCLLGRQKRFP    |
| Q6IFX4 | 238   | NHEEEVNSLQCQLGDRINIEV   |
| P06213 | 328   | GVTMNSSNLLCTPCLGPCPKV   |
| O00468 | 1564  | LPNPCHGGAPCQONLEAGRFHC  |
| A2ASS6 | 9743  | VSEHQSATFCEVSFDDAIVT    |
| Q99K43 | 567   | YPGSTPLQHNCSIKSVASTYS   |
| P45880 | 8     | XXXMATHGQTCARPMCIPPSY   |
| P10768 | 56    | PALYWLSGLCTEQNFISKSG    |
| P00533 | 260   | VCRKFRDEATCKDTCPLMLY    |
| A2ASS6 | 27731 | ICEAELRTTSCKVTKLLKGNE   |
| O00468 | 607   | GPCETCGDAVCAFGAVCSAGQ   |
| Q04750 | 302   | EKNTITNLSKCDFTQMSQYFK   |
| Q3U186 | 11    | MACGFRRSIA CQLSRVLALPP  |

---

---

|        |       |                                                                                                                        |
|--------|-------|------------------------------------------------------------------------------------------------------------------------|
| Q8BRK8 | 106   | VSGGELFDYI <b>C</b> KHGRVEEVEA                                                                                         |
| P13489 | 30    | WAELLPLLQ <b>Q</b> CQVRLDDCGL                                                                                          |
| P29218 | 201   | RSVGTAAVNM <b>C</b> L VATGGADAY                                                                                        |
| Q9JX8  | 412   | NILTHTCPRG <b>C</b> SSXXXXXXXXX                                                                                        |
| O00468 | 1112  | RASCYNSALG <b>C</b> CSDGKTPSLD                                                                                         |
| P70388 | 143   | CAEIDREMIS <b>C</b> LGVSXSVLNN                                                                                         |
| Q62312 | 545   | IQIVCETL <b>T</b> ECWDHDPEARLT                                                                                         |
| Q6ZPY7 | 832   | KRAVRGVREM <b>C</b> DV CETTLFNI                                                                                        |
| A2ASS6 | 33430 | ITKFDGTYR <b>C</b> KVVNDYGEDS                                                                                          |
| A2ASS6 | 7887  | STIEDYAQYA <b>C</b> LIENEAGQDI                                                                                         |
| Q5JTH9 | 839   | SSPAKRPR <b>L</b> K <b>C</b> LLHIVRKL                                                                                  |
| Q92616 | 1984  | SQKSDERQ <b>G</b> V <b>C</b> IGLSEIMKST                                                                                |
| P21817 | 3525  | KKMLPIGL <b>N</b> M <b>C</b> APT DQDLITL                                                                               |
| Q8BGQ7 | 525   | FVDEVVTG <b>Q</b> E <b>C</b> GVVLDKTCFY                                                                                |
| Q9WUQ2 | 280   | PHKRLRQ <b>P</b> PP <b>C</b> YLTAWDSSTF                                                                                |
| Q9JLZ3 | 169   | LGGGLELAL <b>A</b> C <b>D</b> IRVAASSAK                                                                                |
| O55070 | 244   | TSCAYDRIV <b>L</b> <b>C</b> GQEI VNSVVP                                                                                |
| Q05519 | 455   | IETGSPKT <b>K</b> E <b>C</b> SVEKGTGDSL                                                                                |
| Q8BGK2 | 74    | TAEALTTD <b>Y</b> W <b>C</b> LDDLYREMVK                                                                                |
| A2ASS6 | 22713 | YSTVTT <b>K</b> CHK <b>C</b> TYKVTGLTEG                                                                                |
| Q9JIK5 | 609   | RTGRAGRT <b>G</b> V <b>C</b> ICFYQNKEEY                                                                                |
| Q5UIP0 | 1139  | IVIPQDV <b>T</b> ED <b>C</b> GMAEHLEKSS                                                                                |
| Q9Y277 | 36    | MVKIDL <b>K</b> TK <b>S</b> <b>C</b> SGVEFSTSGH                                                                        |
| Q99KC8 | 416   | EVKLNS <b>K</b> KH <b>R</b> <b>C</b> FSFGIGOGAS                                                                        |
| Q5M6W3 | 482   | TDDL <b>I</b> QLIT <b>A</b> <b>C</b> PQIDLIRCLT                                                                        |
| Q64277 | 76    | AFKGVLD <b>K</b> DP <b>C</b> SVLPSDYDLF                                                                                |
| P48725 | 586   | QELTRD <b>D</b> LL <b>P</b> <b>C</b> SQCGQEPAMA                                                                        |
| Q9WV60 | 107   | ELQIMR <b>K</b> L <b>D</b> H <b>C</b> NI VRLRYFFY                                                                      |
| Q99MN9 | 202   | IPQISL <b>I</b> M <b>G</b> P <b>C</b> AGGAVYSPAL                                                                       |
| O00468 | 650   | GSACEL <b>R</b> E <b>A</b> <b>C</b> LQQTQIEEAR                                                                         |
| Q3TBW2 | 64    | I <b>P</b> PK <b>P</b> A <b>I</b> N <b>P</b> R <b>C</b> L <b>P</b> PPPK <b>P</b> KE                                    |
| P20810 | 241   | AIDAL <b>S</b> SD <b>F</b> T <b>C</b> GSPTAAGKKT                                                                       |
| Q9NYY3 | 462   | TLG <b>S</b> CS <b>S</b> SE <b>C</b> LEDSTMGSVA                                                                        |
| P00533 | 506   | ENS <b>C</b> KAT <b>G</b> Q <b>V</b> <b>C</b> HALCSPEGCW                                                               |
| A8C756 | 228   | D <b>S</b> SS <b>P</b> I <b>W</b> Q <b>S</b> M <b>C</b> G <b>L</b> LS <b>I</b> FT <b>K</b> FL                          |
| A2ASS6 | 6864  | V <b>V</b> S <b>N</b> AG <b>Q</b> A <b>S</b> <b>C</b> T <b>T</b> RL <b>F</b> V <b>K</b> E <b>P</b> A                   |
| Q61151 | 314   | R <b>G</b> LM <b>K</b> F <b>W</b> P <b>K</b> T <b>C</b> S <b>Q</b> KE <b>V</b> M <b>F</b> L <b>G</b> E                 |
| P54310 | 163   | L <b>Q</b> E <b>Y</b> VT <b>L</b> H <b>K</b> G <b>C</b> F <b>Y</b> GR <b>C</b> L <b>G</b> F <b>Q</b> F                 |
| O75153 | 1072  | I <b>Q</b> E <b>Y</b> M <b>H</b> L <b>A</b> L <b>Y</b> <b>C</b> F <b>A</b> SS <b>Q</b> L <b>S</b> T <b>A</b> L         |
| Q4G0N4 | 404   | F <b>S</b> SK <b>V</b> C <b>V</b> R <b>S</b> R <b>C</b> W <b>D</b> AC <b>M</b> V <b>D</b> GG                           |
| Q69Z37 | 224   | S <b>N</b> ET <b>F</b> R <b>F</b> AA <b>A</b> <b>C</b> M <b>N</b> S <b>R</b> T <b>N</b> G <b>T</b> I <b>H</b>          |
| Q9D8B4 | 32    | T <b>Y</b> I <b>T</b> T <b>A</b> L <b>G</b> G <b>I</b> <b>C</b> G <b>I</b> I <b>G</b> S <b>A</b> Y <b>R</b> V <b>S</b> |
| P35235 | 367   | T <b>K</b> E <b>V</b> E <b>R</b> G <b>K</b> S <b>K</b> <b>C</b> V <b>K</b> Y <b>W</b> P <b>D</b> E <b>Y</b> A <b>L</b> |
| Q9JK42 | 212   | K <b>D</b> A <b>Y</b> D <b>M</b> A <b>K</b> L <b>L</b> <b>C</b> D <b>K</b> Y <b>M</b> A <b>S</b> P <b>D</b> L          |
| Q9DBC0 | 242   | F <b>Y</b> D <b>G</b> N <b>P</b> K <b>Y</b> E <b>K</b> <b>C</b> T <b>V</b> V <b>L</b> R <b>I</b> A <b>P</b> T <b>F</b> |
| A2ASS6 | 4297  | N <b>L</b> V <b>P</b> S <b>D</b> G <b>K</b> F <b>K</b> <b>C</b> L <b>K</b> E <b>Q</b> N <b>A</b> Y <b>T</b> L <b>V</b> |
| P53569 | 740   | L <b>F</b> A <b>K</b> T <b>I</b> L <b>E</b> G <b>N</b> <b>C</b> I <b>Q</b> Y <b>S</b> G <b>D</b> P <b>L</b> Q <b>D</b> |
| Q08211 | 881   | G <b>C</b> I <b>F</b> Y <b>V</b> G <b>D</b> A <b>I</b> <b>C</b> T <b>I</b> A <b>A</b> A <b>T</b> C <b>F</b> P <b>E</b> |
| P63242 | 22    | A <b>G</b> A <b>S</b> A <b>T</b> F <b>P</b> M <b>Q</b> <b>C</b> S <b>A</b> L <b>R</b> K <b>N</b> G <b>F</b> V <b>V</b> |
| Q9JI75 | 35    | V <b>A</b> V <b>E</b> E <b>L</b> S <b>K</b> Q <b>G</b> <b>C</b> T <b>V</b> T <b>V</b> S <b>D</b> L <b>Y</b> S <b>M</b> |
| Q8CC88 | 1230  | S <b>K</b> E <b>E</b> G <b>E</b> T <b>Y</b> R <b>M</b> <b>C</b> K <b>E</b> F <b>S</b> H <b>K</b> N <b>W</b> V <b>V</b> |
| Q8JZN7 | 79    | Q <b>E</b> E <b>I</b> H <b>K</b> A <b>N</b> V <b>V</b> <b>C</b> V <b>V</b> Y <b>D</b> V <b>S</b> E <b>E</b> T <b>T</b> |

---

---

|        |       |                         |
|--------|-------|-------------------------|
| Q9JHK4 | 260   | VSREEACLSVCF SRPLIVGSK  |
| Q29RF7 | 904   | SAIMKLAQEP CYHEIITPEQF  |
| P21817 | 3014  | PLINQYFTNH CLYFLSTPAKV  |
| P35235 | 490   | IDI IREKGVDC DIDVPKTIQM |
| Q92879 | 137   | MFSSFQIEE CRILRGPDGLS   |
| P54577 | 519   | NFMTKLGSIS CKSLKGGNISX  |
| P58404 | 17    | AAVASAASS CRPLGSGTAPN   |
| Q92616 | 932   | HVTLRLLKPE CVLDKSWCQEE  |
| Q8BKC5 | 915   | YFISPMLOQVCDNSPEVRQAA   |
| O55091 | 235   | CEDKQTFLODC EDDGETAAGG  |
| P30681 | 106   | KRPPSAFFLF CSENRPKIKIE  |
| P53618 | 235   | LVIVELIYKV CHANPSEARF   |
| Q924M7 | 251   | LHQHPGDIG CFAIYFLNLLT   |
| O75694 | 637   | IOPPAMSTPVC ALGNPATQAT  |
| Q8R1S0 | 132   | AFRRMQVWDS CSEALIMFDRD  |
| O70572 | 261   | CCETLKT TTGCDPHSDKPFS   |
| O00468 | 2016  | PKAYGTGFVGC LRDVVVGRHP  |
| P02730 | 885   | PLIFRNVELQ CLDADDAKATF  |
| P97821 | 290   | PILSPQEVVSC SPYAQCGDGG  |
| O75694 | 356   | AVIENSESLDC QLLAVTHAGV  |
| Q9GZT4 | 128   | IQAYGASIVY CEPSDESRENV  |
| A2ASS6 | 8625  | KYQTTLTDNT CALTVMLEEA   |
| A2ASS6 | 15721 | LDPDTDKWVRC NKMPVKDTTY  |
| O60443 | 408   | DSAAALLGTC CKLQI IPTLCH |
| P49327 | 2468  | LGADYNLSQV CDGKVSVHVIE  |
| Q9QZ73 | 90    | KIGIDGIQQF CDDLALDPASI  |
| Q9JHU4 | 3806  | SQQYLPLSTAC SSIYFTMESL  |
| P13489 | 409   | SLRELDLSNNC LGDAGILQLV  |
| Q9BXJ9 | 817   | EALYDGS LGDCKEAAEIYRAN  |
| A8C756 | 591   | HRGALGALMAC LR TARAHGHL |
| Q8CG76 | 106   | GLGLGLSGDC TVKIATKANP   |
| Q99MN9 | 21    | AAGARLSVLNC GLGITTRGLC  |
| P11172 | 86    | YTALPLATVIC STNQIPMLIR  |
| Q9UBF2 | 230   | KSGLKSQFAYC MLIRIASRLL  |
| Q1XH17 | 56    | AADGTVACPC CQAPTRPQALS  |
| O70325 | 64    | VCLDKYRGFVC IVTNVASQUG  |
| Q8BKC5 | 776   | LSEIMHSFAK CIEVMGDGCLN  |
| P49327 | 2024  | DYFVVFSSVSC GRGNAGQSNY  |
| P45376 | 299   | LLSYNRNWRVC ALMSCAKHKD  |
| P07814 | 1480  | GAPSMGAKSLC IPFKPLCELQ  |
| A2ASS6 | 23493 | RDKAGQRWVK CNKKALTDLRF  |
| A2A432 | 321   | ANLYKQLRQIC EDHIKAQIHQ  |
| Q9D1P4 | 176   | YQGLQSLEEV CVYHSGVPIFH  |
| P34932 | 270   | IRALLRLSQE CEKLLKLSAN   |
| P13489 | 323   | CQLESLWVKS CSFTAACCSHF  |
| Q3U5Q7 | 226   | RDAARAVLEE CTSFIPEARAV  |
| Q8CC88 | 300   | SQLLSFATTLC SQESSTLGLP  |
| Q9D819 | 270   | KAIVDALPPP CESACSLPTDV  |
| Q01518 | 416   | PTISINKTDGC HAYLSKNSLD  |
| Q99LD8 | 176   | VSGSSHRLRGL CGMGGPRTVVA |
| Q5SSW2 | 500   | PGVDPNDFSKC MITFQFIGTF  |
| Q8K4Q0 | 1037  | SVVKFHPFTP CIAVADKDSIC  |

---

---

|        |       |                                          |
|--------|-------|------------------------------------------|
| Q9ER60 | 763   | CGEWIETMWD <b>C</b> MEVAGQAMCL           |
| Q9ER60 | 1724  | TTLKRKQEEV <b>C</b> AIKIQRAYRR           |
| Q9NVM4 | 368   | RVRQMRPVCD <b>C</b> QAHLWLNRPR           |
| A2ASS6 | 19362 | SFSSVLTIKN <b>C</b> LRKDTGEYQL           |
| Q9WTI7 | 860   | LCMKNMVWKY <b>C</b> RSISPEWKQQ           |
| O00468 | 172   | TPVPPTPPD <b>C</b> RGMLCGFGAV            |
| Q6PGB6 | 60    | YFNDAVAV <b>C</b> CRVDHSQNOK             |
| Q9R062 | 233   | TYNPQTKSVN <b>C</b> DSQDPTVSHP           |
| Q9NQC3 | 559   | GLTPDLVQ <b>E</b> ACESELNEVTGT           |
| Q9EQQ9 | 896   | RILEFYSKLG <b>C</b> FEIAKMEGFP           |
| O89103 | 308   | ASRNPCSSNP <b>C</b> TGGGMCHSVP           |
| Q8BGQ7 | 152   | EAAGLEPDLE <b>C</b> RQIWQNLGLD           |
| P00533 | 526   | WGPEPRDCVS <b>C</b> RNVSARGRECV          |
| Q9ESD7 | 1631  | SVSDQDNYIP <b>C</b> TLEPVFGKMF           |
| O70468 | 1249  | PCPYDGGVYV <b>C</b> RATNLQGEAQ           |
| P08397 | 247   | VLHDPETLLR <b>C</b> IAERAFLRHL           |
| P98192 | 512   | PGLRKEDVFS <b>C</b> FSFLRNVFSD           |
| Q5UIP0 | 1692  | RLHKRDSFDN <b>C</b> SLGESSKIGI           |
| O00468 | 669   | ARAGPCEQ <b>A</b> ECGSGGSGSGED           |
| Q9BQG0 | 1096  | LELLNVLFRT <b>C</b> KHEKLTLDLT           |
| Q64436 | 352   | PEGLLATVTV <b>C</b> LSLTAKRLAS           |
| Q64436 | 365   | LTAKRLASKN <b>C</b> VVKNLEAVET           |
| P11172 | 255   | RLMQKKETNL <b>C</b> LSADVSLARE           |
| Q91WD7 | 740   | VMNDNSQK <b>A</b> LCRIESPLSRTE           |
| Q99873 | 240   | VDPKQLVTN <b>A</b> CLIKEVDIYTV           |
| A2ASS6 | 7980  | VDHSDVGEY <b>T</b> CKAENSVGAVA           |
| Q14166 | 572   | ACAKPPPLGL <b>C</b> DYPSSRAMYA           |
| Q9QYJ0 | 143   | TKLQLSKNVL <b>C</b> SACSGQGGS            |
| O00468 | 729   | GSDGVTY <b>S</b> TECELKKARCESQ           |
| Q9DB43 | 35    | EHCLVANHAK <b>C</b> IVQSYLQWLQ           |
| Q12879 | 456   | TNEGMNVKK <b>C</b> CKGFCIDILKK           |
| P28474 | 211   | GGVGLAVIM <b>G</b> CKVAGASRIIG           |
| Q7TNG5 | 605   | GKVHLFSYP <b>C</b> QPRALSHKYG            |
| Q99KN2 | 86    | LASASFDAT <b>T</b> CIWKKNODDFE           |
| Q9D1I5 | 126   | KNKAGGMH <b>H</b> VCIEVDNISAAV           |
| Q9D1P4 | 10    | XMALLCYN <b>R</b> CGQRFDPPEANS           |
| Q6P1X6 | 66    | DDSKMKNF <b>I</b> TCFKDPQFLVTF           |
| P32921 | 309   | KIFRDRTDI <b>Q</b> CLIPCAIDQDP           |
| P21333 | 2107  | LEDGTCRV <b>T</b> YCPTEPGNYIIN           |
| Q92616 | 1362  | SQQVQESV <b>A</b> SCLPPLVPAIKE           |
| A8C756 | 1033  | AEVKGK <b>E</b> EKACDVTAQMV LAC          |
| Q7Z6M4 | 142   | ILLGLNPE <b>P</b> VCVVLKKSPQLL           |
| Q00610 | 436   | QLNKYESL <b>E</b> LCRPVLOQGRKQ           |
| Q8C7B8 | 540   | GCLCRAL <b>L</b> EACRLEEEPHSLF           |
| Q9ES28 | 77    | LSNIRE <b>F</b> LRA <b>C</b> GASLRLETFD  |
| Q9ET26 | 45    | EVFEK <b>P</b> VQVP <b>C</b> GHVFC SACLQ |
| Q16658 | 260   | KDELFA <b>L</b> EQ <b>S</b> CAQVVLQAANE  |
| Q6P3A8 | 359   | LNLEAP <b>I</b> SRV <b>C</b> GYDTPFP HIF |
| Q9JHK4 | 186   | SNYSSW <b>H</b> YRS <b>C</b> LLPQLHPQPD  |
| Q8R5G7 | 633   | NLLKN <b>M</b> AQ <b>L</b> LCVETSEGE EPL |
| Q9CXA2 | 317   | FTGCA <b>V</b> REAK <b>C</b> GDFKAVIVEV  |
| Q9CPP0 | 79    | LCLTE <b>G</b> AT <b>D</b> ECNVVEV VARDH |

---

---

|        |      |                         |
|--------|------|-------------------------|
| Q9DB29 | 137  | RVILITPPPLCEAAWEKECVL   |
| Q99K01 | 200  | LCNQLGLPFPCLCRVPCNTMF   |
| P48725 | 1668 | LQVLYRPFLKCRMQLDQHQP    |
| Q91VH6 | 279  | SFLNYAQSSQCRSWQDSSVSY   |
| Q9DBF1 | 248  | LEDNLLPGAI CSLVCGGADIG  |
| P30153 | 148  | GDWFTSRTSACGLFSVCYPRV   |
| Q9ER60 | 772  | DCMEVAGQAMCLTVFLMVMVI   |
| O00468 | 1128 | TPSLDAEGSNCPATKVFQGV    |
| Q8JZN7 | 472  | VNGQEKYLILCEVNADSLD     |
| P21333 | 1353 | SPFQVPVTEGCDPSRVRVHGP   |
| O70546 | 960  | DAFFPPLHQFCTNPNNPVTVI   |
| Q99KQ4 | 401  | TRDLLNCSFKCSYVVTNGLGV   |
| O70325 | 29   | LAAPGLAGTMCASRDDWRCAR   |
| Q9WU65 | 529  | PENGDNPVFSCLPLGFFIVSS   |
| Q6NZJ6 | 940  | NHDEESLECLCRLTTIGKDL    |
| Q91YE3 | 140  | RSPGPERASLCPAGGGPGEAL   |
| Q62234 | 694  | EGKSYRFRVRCNSAGVGEP     |
| Q91VH6 | 88   | GPSHHVPLSRCALSSVDIYRT   |
| Q8K1X1 | 83   | NYHHNIGSPYCLRLASADVTG   |
| Q8BRK8 | 413  | HLGIRSQSKACDIMAEVYRAM   |
| Q99KC8 | 5    | XXXXXXXXMEHHCGLITSNKETV |
| Q8BKC5 | 986  | VGKIMKFKPDVNVVEEVLPHW   |
| Q9JLI6 | 129  | EEGTRPHFITCTVEHDSIRLP   |
| Q9BY44 | 132  | SFIQKKMQRNWCPSWSEDETL   |
| A2ASS6 | 5924 | QCIIANEGGSCACSARVALKE   |
| Q3TCJ1 | 62   | QVIEIHNHQPCSQLFSFYDYA   |
| Q7TPD0 | 594  | LQKGS DTEAQCEVMQEIVDQV  |
| P26639 | 656  | FMADIDLDPGCTLNKKIRNAQ   |
| P70388 | 102  | EMVAVHRSM LCSQKNKKTEFK  |
| Q62234 | 1142 | DDGVISLNFEC DQMPKSEFV   |
| Q5SSW2 | 1625 | YDELKRDAKLCLSLMSQGLLY   |
| P00533 | 595  | YIDGPHCVKTCPAGVMGENNT   |
| P00533 | 232  | RCRGKSPSDCCHNQCAAGCTG   |
| Q29RF7 | 589  | PTCSCQADICVREIARKLAN    |
| Q8VDK1 | 199  | TPAGKVGLAICYDMRFPELSL   |
| Q06587 | 69   | MTTKECLHRFCSDCIVTALRS   |
| Q9BXP5 | 715  | TQELGKDKWLCPLSGKKFKGP   |
| P26639 | 174  | AMERVYGGCLCYGPPIENGFY   |
| Q9CXY6 | 311  | VMTLEQQDMVCYTAQTLVRIL   |
| Q99683 | 1351 | LYYVTRDDLKCLRLRGMLCT    |
| Q64702 | 740  | MDHANEGHRICLSLESVISEE   |
| Q6NXE6 | 17   | SRYSSGASIGCTPTSTQAKMV   |
| P97447 | 209  | RFTAVEDQYYCVDCYKNFVAK   |
| Q6IFX4 | 36   | RTNSSSNKSCCHDGQSTGCAL   |
| Q9CPY7 | 145  | LELPSVEVDP CGDAQAAAEGA  |
| P62736 | 2    | XXXXXXXXXXMCEEEDSTALVC  |
| Q8CGC7 | 5    | XXXXXXXXMAALCLTVNAGNPPL |
| P16546 | 1314 | PESAEDLKEKCTELNQAWTSL   |
| Q9D1G3 | 477  | TTLAVLFVITYCGVQLVKERER  |
| P19096 | 1354 | KGHALGETLACL PSEVQPAPS  |
| Q96EK6 | 179  | G YTVSEENYMCRRFLKXXXXX  |
| Q9DB26 | 3    | XXXXXXXXXMACLSPSQLKKFQ  |

---

---

|        |       |                         |
|--------|-------|-------------------------|
| P97390 | 359   | EVSEVEQELACQNDHSSALQN   |
| P50462 | 40    | FHKTCFHCMACRKALDSTTVA   |
| Q9DBC0 | 462   | LTGADFTNTFCVLSSFPADLS   |
| P18206 | 313   | LDEAGKVGELCAGKERREILG   |
| Q8BIJ6 | 414   | VASQHSPLMDCLVDEGGMFTD   |
| Q6NSR8 | 311   | GFKDNLHAVFCLAENAVGPNA   |
| Q11011 | 266   | FVETRSKDGVCVRVYTPVGKA   |
| Q9BY44 | 80    | LHSFDLLKAVCLEFSPKNTVL   |
| Q3UK37 | 25    | LPEAVAALSRCLPAGPSPEIF   |
| Q9ESW4 | 370   | AGTECLQASHCTLVLPEGTEG   |
| P78527 | 3781  | MNGILAQDSACSQRALQLRTY   |
| Q9CZW5 | 478   | FEEI IKKFPRCAEGYALYAQA  |
| P00505 | 272   | RHFIEQGINVCLCQSYAKNMG   |
| Q99714 | 91    | KFGRVDVAVNCAGIAVASKTY   |
| Q9H2U2 | 302   | NVQISDSPFRCTQEEARSLVE   |
| Q61699 | 659   | KLCGPYEKFI CEQEHEKFLRL  |
| Q8R1F1 | 194   | QAVLQDCVRHCNNGIPENSKV   |
| Q91W97 | 386   | TIVSFRSANLCAAALATILTR   |
| Q15149 | 1405  | IERHGKVEECQORFAKQYINA   |
| P10518 | 122   | FPSLLVACDVCLCPYTSHGHC   |
| Q99683 | 225   | YMITPHNKVYCCDSSFMKGLT   |
| Q922B2 | 259   | SPQLYKQMCICADFEKVF CIG  |
| A2ASS6 | 22158 | APSESTGTII CKDEYEAPTIV  |
| P21817 | 3785  | AEMVLQ MISACKGETGAMVSS  |
| Q8BUN5 | 31    | GEONGQEEKWCEKAVKSLVKK   |
| Q99873 | 216   | WENVYGFDMSCIKDVAIKEPL   |
| Q92616 | 121   | SAALLALTWTCLLV RIVFPSR  |
| Q91YR7 | 698   | LGNISAAQELCEEALRHYEDF   |
| P30048 | 45    | CGRTSLTNLLCSGSSQAKLFS   |
| O00468 | 1832  | SGHPCLNGASCVPREAA YVCL  |
| O43143 | 599   | SITAMLSVPQCFVRPTEAKKA   |
| Q9UL62 | 248   | KA EYEELSQQCKLFAKDLLDQ  |
| Q6NZJ6 | 823   | PNFSVAYANMCRCLMALKVPT   |
| Q9H9A6 | 469   | NKLSFISLELCVLQKLTFLDL   |
| O89103 | 406   | GCINTDGSFYCSCKEGYIVSG   |
| Q99700 | 332   | EEIMESILFKCSDFVVVQFKD   |
| O14744 | 196   | WMWWHNFRTL CDYSKRIAVAL  |
| Q921S7 | 177   | TEDI PKRETYCPLIVDSL IQL |
| P35557 | 230   | CEVGMIVGTGCNACYMEEMQN   |
| P78347 | 80    | KDFQKDFVKYCV EEEEEKAAEM |
| P17710 | 669   | SFPCKQTSLDCGILITWTKGF   |
| Q9Z1Z2 | 152   | HTSGIKKALWCSDDKQILSAD   |
| A2ASS6 | 24676 | CDVSVGEWTMCTPPTGINKTN   |
| P22102 | 1005  | TVQLGENGKICWVKEEXXXXX   |
| A2ASS6 | 4321  | VKTEDEGEYVCEASNDSGKAK   |
| Q99JB8 | 36    | VQRVEDGHRLCGDLVSCFQER   |
| Q8TCG1 | 58    | NQILTSECLSCLVELLED PNI  |
| Q921M4 | 829   | LKERVEELEHCCIQLSGETDT   |
| Q9R190 | 106   | SLPATHIRGKCSVTLLNETDI   |
| Q6ZWY3 | 59    | HAQTVVLCVGCSTVLCQPTGG   |
| P08752 | 225   | CFEGVTAIIFCVALSAYDLVL   |
| Q6PDN3 | 43    | PAFILPPRNL CVKEGATAKFE  |

---

---

|        |       |                          |
|--------|-------|--------------------------|
| Q3TXS7 | 806   | KMPKVQYKSNCKPSTFAYPAP    |
| P78527 | 1128  | EKSLGTIQQCDAIDHLCRII     |
| Q61024 | 455   | KHLLRETFEDCNLLPKEILWR    |
| P27816 | 654   | VLEKLGGERKPCNSQPSELSSE   |
| Q92879 | 119   | KLFIGMISKKCTENDIRVMFS    |
| Q99KN2 | 261   | HTRTIYDVAWCQLTGALATAC    |
| Q14315 | 805   | GQGDVSIKIKCAPGVVGPAAEA   |
| O75153 | 333   | TAPQAEHAMDCVRAEDAYTSR    |
| Q8R086 | 318   | HRLCDSEAHVCFEGLDSDPTG    |
| P29474 | 707   | GWAQAAFQAACETFCVGEDAK    |
| O70546 | 1358  | SNSRKTYIVHCQDCARKTSGN    |
| Q86VP6 | 500   | SSNLKIDALSCLYVILCNHSP    |
| Q99KB8 | 35    | LGQALLGLSLCHSDFRKNLTV    |
| O00468 | 766   | APLPPVAPLHCAQTPYGCCQD    |
| Q9CPV4 | 206   | AAAFGRIFAFCPQKELPDLED    |
| Q8K2B3 | 190   | FGKGGQAHRC CVADRTGHSL    |
| Q99JW4 | 193   | PCHDKMGVPICGACRRPIEGR    |
| Q5VYK3 | 1459  | EKEEPIYKTS C ALTIHAIGRY  |
| A2ASS6 | 6384  | LGTEDSGDFICEAQNPA GSTS   |
| Q99JW4 | 275   | SALNKAWCVS CFACSTCNTKL   |
| Q8R0N6 | 243   | VVANSGFDVLC HALESYTAIP   |
| Q9Z2W0 | 239   | SPDSIMEMELCLADTQPAVLG    |
| P22314 | 748   | GAPFWSGPKRCPHPLTFDVNN    |
| P28651 | 78    | DVRLSPNYVVCRDCEVTNDGH    |
| P55072 | 209   | NEVGYDDIGGCRKQLAQIKEM    |
| P22102 | 559   | EAVVAGIAKACGKAGCALLGG    |
| Q9R1V6 | 347   | RSGAAYIGGIC SLLRGGGVNE   |
| A2ASS6 | 30780 | SEVGDGRWLKCN YTI VSDNFF  |
| Q9CR76 | 27    | WRRPLQGLWCCSGQGDSKRWV    |
| Q62407 | 57    | FLRPLKNAAVCAGSDVRLRVV    |
| P78527 | 2244  | NLEI IKTLVECWKDCLSI PYR  |
| Q9R190 | 261   | TLVPQGGPVL CRDEMEEWSAS   |
| Q5UIP0 | 895   | LEKLLGEI IACLQFSYTGTYD   |
| Q8BGC4 | 330   | LELYARGDLVCEVDLGH LAPD   |
| P00533 | 591   | QCAHYIDGPHCVKTCPAGVMG    |
| Q01320 | 1142  | YLTKEKKDELCKQRNEKEQEL    |
| Q8BUN5 | 338   | PATVCKIPPGCNLKI FNNQEF   |
| A2ASS6 | 30207 | DSFSTLTVEN CNRNDAGKYTL   |
| Q9H0C8 | 242   | ANLGDSRAILCRYNEESQKHA    |
| P10768 | 28    | VFEHDSVELNCKMKFAVY LPP   |
| Q8CGC7 | 910   | EAKVLFDRVACQGEVVRKLKA    |
| O94979 | 787   | PNIMQLRDRLCRAQGE PVAGH   |
| A2ASS6 | 15416 | SRIKGYIVEKCPRGSDK WVAC   |
| P21817 | 345   | PPEIKYGESL CFVQHVASGLW   |
| O00468 | 320   | FKKFDGPCDPCQ GALPDPSRS   |
| Q91YP0 | 135   | CNLKGI PYRQC GKLI VAVEQE |
| P21333 | 2293  | ISFEDRKDGS CGVAYVVQEPG   |
| Q6ZPY7 | 1514  | DFV SPEHVKHCFRLTQEF RHL  |
| Q9WUM3 | 192   | VSWNHNGSLFCSACKDKSVRI    |
| Q9WV60 | 76    | SFGVVYQAKLCDSGELVAIKK    |
| P70168 | 436   | DTTAWTVGRICELLPEAAIND    |
| O75694 | 874   | PLLYSTDDAICSKANELLQRS    |

---



---

|        |      |                        |
|--------|------|------------------------|
| Q8BGX2 | 155  | DAQASLYQARCRYLQPRWVDF  |
| Q14690 | 1473 | PQAQKRGGRECRESGSEQERV  |
| P62932 | 403  | KSDLIKTTLQCALERELKGHV  |
| Q8VE38 | 113  | GVSVVGGFSICSSPQRLERDR  |
| Q9Z2U0 | 70   | RKICALDDNVCMAFAGLTADA  |
| Q9CXJ4 | 465  | TFQNVTFSSYPCRPGFNVLKDF |
| P14780 | 373  | SEGRGDGRLWCATTSNFDSDK  |
| Q5VYK3 | 1420 | TDRNSVIQKSCAFAMGHLVRT  |
| P21333 | 2479 | PSKVKMDCQCEPEGYRVTYTP  |
| Q9WVA4 | 38   | QILIQWITTOCREDVGQPQPG  |
| O00468 | 868  | DCEQMTGLCSCKPGVAGPKCG  |
| Q9DBC0 | 203  | VLRSSIREFLCSEAMFHLGIP  |
| O75153 | 912  | AKNYFDLQLECEETVDQAVETY |
| Q61768 | 302  | GNCRTTIVICSPSSYNESET   |
| Q9JHU4 | 2637 | ELLLKTFDHYCEYRRTPNGVV  |
| Q9C0B1 | 346  | QRCQLALQNVCDVDNDVSL    |
| Q16658 | 19   | AVQIQFGLINCGNKYLTAFAF  |
| Q6P1X6 | 22   | ALARSRGARACSGDGGVSYTQ  |
| P00533 | 19   | AALLALLAALCPASRALEEKK  |
| P63318 | 20   | DSEGGPRPLFCRKGALRQKVV  |
| Q7TPR4 | 690  | NYKPKIDQLECDHQLIQEALI  |
| Q3TL44 | 735  | HPLDEVNLCQQLDPAGLHTL   |
| P21817 | 1191 | IEIGDGFLPVC SLGPGQVGH  |
| Q99683 | 206  | KEIICQKNTMCTGNYTFVPYM  |
| Q8BW75 | 156  | MTMKELLDKICWTKSTKQIAT  |
| Q9BUJ2 | 331  | DKFAENDVIGCFADFECGNDV  |
| A8C756 | 457  | LEWHIKGKYACLGLVETLGI   |
| Q8BUV3 | 154  | LPGSKKGSQCFQFILPALPH   |
| Q8WTY4 | 244  | SCGEGKKRKACKNCTCGLAEE  |
| Q9DAK9 | 70   | SGELQRNGYDCECLGGGRISH  |
| O60610 | 1027 | MTLLHFLAELCENDYPDVLKF  |
| Q99NB9 | 1204 | HMSLG VYGFGCEDSLNHLLNY |
| Q8QZR5 | 405  | QVFNEAPGIRCNPVQAMYSF   |
| Q5UIP0 | 596  | IQLIFNNFLECGVSDERFFLS  |
| Q64520 | 116  | GVRSIKKTDLCPIYIFVQPPS  |
| Q3TL44 | 199  | PAFELLIPFSCEDLSSLGSTP  |
| O76021 | 211  | TVLNISKSGSCSAIRIGHVGM  |
| Q9JHU4 | 3145 | PTHREAIVNSCVFVHQT LHQA |
| P41216 | 464  | QFYEGYGQTECTAGCCLSLPG  |
| P80314 | 412  | KDPRTVYGGGCSEMLMAHAVT  |
| P50396 | 17   | VIVLGTGLTECILSGIMSVNG  |
| Q8CIB5 | 12   | ALDGIRMPDGCYADGTWELSV  |
| P56380 | 143  | ATLQEGHQFLCSTPAXXXXXX  |
| Q9ER72 | 175  | RDYFQYDVFYCMNITDIDDKI  |
| Q64737 | 769  | EAWVIGSVVACPEDSPRVVK   |
| Q8C460 | 313  | IGRPHSGIDDCKNIANIMKTL  |
| P62829 | 125  | SAITGPVAKECADLWPRIASN  |
| P06213 | 239  | TAEGLCCHSECLGNCSQPDDP  |
| Q60770 | 48   | DEFTTKLLSSCKMTDLLEEG   |
| Q6A0A9 | 147  | WFLPPVCMACHIRLALIRFHV  |
| P58281 | 11   | MWRAGRAAVACEVCQSLVKHS  |
| Q00987 | 475  | AKKLLKRNKPCPVCROPIQMI  |

---

---

|        |      |                         |
|--------|------|-------------------------|
| Q921G7 | 588  | LQINAQNCVHCKTCDIKDPSQ   |
| P12268 | 339  | SICITQEVLA CGRPQATAVYK  |
| P58404 | 271  | VLEQIPFLQNC EDEDSDEDDE  |
| P06213 | 186  | KDDNEECGDI CPGTAKGKTNC  |
| Q9JHK4 | 487  | ALPPALAAALR CLEVLOASDNV |
| O00468 | 750  | RGLYVAAQGA CRGPTFAPLPP  |
| P62827 | 120  | RVCENIPIVLC GNKVDIKDRK  |
| Q91YP0 | 259  | KEIRCRYVVT CAGLYSDRISE  |
| Q91WD7 | 538  | IPEALNKELH CHHLHLQNKEL  |
| Q9Z1Z0 | 499  | QTRVGLLMLL CTWLSNCP IAV |
| Q9CZW5 | 547  | ISKAIEIDNK CDFAYETMGTI  |
| Q9D7N3 | 25   | WFTPAVRASLC QRPGYWTASA  |
| Q9D2G2 | 7    | XXXXMLSRSR CVSRAFSRSL S |
| Q3UMB9 | 264  | QLLDGMIFQAC IEQQFDSLNG  |
| Q9ER72 | 110  | QWSPAGTEPC RLRLYNSLTR   |
| Q8WX93 | 1058 | YTIQRDL DGTCSLHTTASTLD  |
| Q29RF7 | 508  | AVKALNEMWK CQNMLRSHVRE  |
| Q04206 | 105  | CRDGFYEAEL CPDRCIHSFQN  |
| O14920 | 115  | RKYLNQFENC CGLREGAILTL  |
| P63254 | 28   | TSLGKDWHRP CLKCEKCGKTL  |
| Q7TNG8 | 251  | PAPEATVAAT CAFPSVQAAVD  |
| O00220 | 204  | TFRNDNSAEM CRKCSRGCPRG  |
| Q9JI75 | 122  | ILKGWMDRVL CRGFAPDIPGF  |
| P62918 | 115  | GTMPEGTIVC CLEEKPGDRGK  |
| O00468 | 1576 | NLEAGRFHCQ CPPGRVGP TCA |
| Q99798 | 284  | SISCTGMATIC NMGAIEIGATT |
| P55072 | 174  | KVVETDPSPY CIVAPDTV IHC |
| Q9WUQ2 | 357  | TDVTFLPEKGC GPKLLGPHET  |
| P34932 | 167  | MDATQIAGLN CLRLMNETTAV  |
| Q9CXJ4 | 670  | SIIVMANGQV CEAGTHEELLK  |
| Q9UHG3 | 462  | DRLYYLNGIE CAASAMEMSAI  |
| Q8BGD5 | 73   | LFLFSTIQLA CLLQLDPSLGL  |
| Q8WTY4 | 235  | PDPASLKAPSC GEGKRRKACK  |
| O89103 | 397  | AAANSPCAQGC INTDGSFYCS  |
| Q64436 | 487  | MGYRDRFPKV CEIPFNSTNKF  |
| P45377 | 50   | YRHIDCAYAY CNENEVGEAIQ  |
| P13439 | 394  | KAAVGMAEEH CEFVIGFISGS  |
| Q8QZT1 | 25   | LLRGLLQEVRC LERSYASKPT  |
| Q05586 | 22   | LFSCSVARAAC DPKIVNIGAV  |
| O14983 | 561  | EWGTGRDTLR CLALATRDTPP  |
| O00468 | 1558 | CGDHPCLPNP CHGGAPCQNL E |
| P68366 | 20   | GQAGVQMGNA CWELYCLEHGI  |
| P70168 | 826  | ACAAGLIGDLC TAFGKDV LKL |
| P62983 | 121  | NGKISRLRRE CPSDECGAGVF  |
| Q99K01 | 443  | GEQLKQLVPQC GLTVIDLEVD  |
| P83731 | 36   | GKVFQFLNAK CESAFLSKRNP  |
| Q08211 | 888  | DAICTIAAAT CFPPEPFINEGK |
| Q9WTI7 | 679  | EAFLOQRYKSL CPETWPMWAGR |
| O70433 | 89   | PFAAKEEQLL CTD CYSNEYSS |
| A8C756 | 71   | LLEKVDKNGV CDPAIQSCLDI  |
| Q06587 | 332  | GASDTGGPDGC GGEGGGAGGG  |
| P47857 | 550  | IGADTALNTI CTTCDRIKQSA  |

---

---

|        |       |              |             |
|--------|-------|--------------|-------------|
| P50991 | 252   | EKAKIGLIQFCL | SAPKTDMDN   |
| Q80ZW2 | 29    | LDGWYLVRVPC  | AVLRARLLQP  |
| Q9BXJ9 | 322   | KFLRMNFSKGC  | PPVFNTLRSL  |
| P22102 | 733   | SEEEMARTFNC  | GVGAVLVVSK  |
| Q92616 | 2501  | VAVNVAPGRLC  | AGRYSSDVQE  |
| Q8K4Q0 | 36    | LPLAFMKKRHC  | EKIEGSKSLA  |
| Q9UNM6 | 49    | LQVLDFVQDPC  | FAQGDGLIKL  |
| Q8BVZ1 | 284   | TQELWGSWSPC  | LENGRSHSEV  |
| P61922 | 197   | RGFSKEELET   | CMVNQSPGCPD |
| P53041 | 442   | EGYEVAHGGR   | CVTVFSAPNYC |
| Q9BXJ9 | 309   | NFLSGEKFKEC  | LDKFLRMNFS  |
| P14131 | 127   | RTLLVADPRRC  | ESKKFGGPGA  |
| Q3UMB9 | 659   | HLESHELLLD   | CYDKEIMDILN |
| Q3TC72 | 235   | TIADPHNLKIC  | CRVNGEVVQS  |
| Q13557 | 481   | GSPTVPIKPPC  | IPNGKENFSG  |
| Q8CFE6 | 228   | LGYTSGLSLLC  | MIFFLIVVIC  |
| Q08752 | 176   | EVKGEKPAKLC  | VIAECGELKE  |
| P35486 | 190   | ACKYNGKDEV   | CLTLYGDGAAN |
| P58059 | 60    | RRRQRESYET   | CRRINMEMAR  |
| Q86VP6 | 592   | DQEVKERAISC  | MGQIICNLGD  |
| P19096 | 274   | PSGEVQEQLIC  | SLYQPAGLAP  |
| Q5SSW2 | 1840  | LVLTDLLVSPC  | YYAXXXXXXXX |
| Q9JLI6 | 375   | RTLLASVGASC  | HSNHEDRPSP  |
| P22102 | 891   | VLEEFSDIVID  | CLAGFMRILSG |
| P32067 | 231   | ETRALEGKMG   | CLKFSGDLDD  |
| A2ASS6 | 18422 | FLSDNLTNDS   | CKLTWFSPEDD |
| Q9JIX8 | 513   | PLAQKSSLPEC  | STQKGVESER  |
| Q8BWF0 | 330   | KFRNAGQTCVC  | SNRFLVQRGI  |
| Q6P2B1 | 908   | FHKQVTSAEEC  | KQVCWALRDF  |
| O08715 | 700   | LRSLDQOMYLC  | YSQPGIPTLP  |
| Q99J09 | 186   | SPHKDSVFLSC  | SEDSRILLWD  |
| Q9D6M3 | 290   | GPSAFLKGAYC  | RALVIAPLFG  |
| P68036 | 17    | LMKELEEIRKC  | GMKNFRNIQV  |
| P62746 | 83    | SYPDTDVILMC  | FSDVSPDSLE  |
| Q99KN2 | 19    | SRVPAHPDSRC  | WFLAWNPSGT  |
| Q02257 | 90    | ARAKRVREAMC  | PGVSGEDSSL  |
| O75694 | 556   | QACATCLILAC  | STAACDREVS  |
| Q8CGY6 | 207   | LAAVRTLSGMC  | SGHRARATAI  |
| Q99L45 | 282   | YIKEYVTCHTC  | CRSPDTILQKD |
| Q9DBC0 | 82    | LATPRPVPGAC  | FSRARPAPLR  |
| P14873 | 2138  | PSGGKQOGRQC  | DETPPTSVSE  |
| Q6NXE6 | 6     | XXXXXMSERC   | CSRYSSGASIG |
| Q9D1G3 | 393   | DIVYLWSVLNC  | FGLNFELWVQ  |
| Q8C7B8 | 366   | LLGTWDKLDVC  | PLEEGNYSLD  |
| P40227 | 282   | KKI IELKRKVC | GDSDKGFVVI  |
| Q9BSK1 | 118   | SDAFGGYGRSCL | LHIKRDKTLT  |
| Q62523 | 526   | VALDKNFHMKC  | YKCEDCGKPL  |
| O70546 | 900   | YPSSAEVLKAC  | RNLGKNGLSN  |
| P54136 | 615   | ATAFTEFYDSC  | YCVEKDRQTG  |
| O95573 | 466   | SATTQRFMNIC  | FCCPVGQGYG  |
| P42704 | 380   | SVFGSFFLQHC  | VTMNTPVEKL  |
| O89103 | 644   | NQYSPTPGTD   | CXXXXXXXXXX |

---

---

|        |       |                        |
|--------|-------|------------------------|
| P22102 | 466   | PLAKATSRSGCKVDLGGFAGL  |
| A2ASS6 | 33458 | KGVREVDYDYCRRTKKVKRRT  |
| Q9DCZ1 | 205   | GYPQLSAVIECADSAHGLKGH  |
| Q99NB9 | 1244  | LEGLRVAIGPCRMLQYCLQGL  |
| Q8VDQ1 | 344   | TGGNVGKQIVCISEDSSLXXX  |
| Q08752 | 52    | PKTAENFRALCTGEKGIGHTT  |
| Q5UIP0 | 1718  | LSEKTFQMLECQHRSRRVRR   |
| Q02566 | 539   | MGIMSILEEECMFPPKASDMTF |
| Q6ZQ73 | 1138  | FIMLARLATLCPAPVLQRVDR  |
| P98156 | 127   | EISCGARSTQCIPVSWRCDGE  |
| Q06203 | 503   | GLECFEKSGHCTACLTKGYPV  |
| Q9DCS1 | 120   | AFLHKKRGGTCWALMRTLVL   |
| Q8BGQ7 | 711   | VPVSELLDDPCGPAGSLTSVE  |
| P00966 | 97    | YLLGTSLARPCIARKQVEIAQ  |
| A2ASS6 | 23241 | PPSEPSDAITCRDDLEAPRIM  |
| Q9D1G3 | 187   | HGGSSFTVLRCTSFALSCAH   |
| Q5UIP0 | 1865  | PNENFKTVGPCLGDSKNVSQE  |
| P51174 | 303   | LLIAELAISACEFMFEETRNY  |
| P07742 | 544   | TIYYGALEASCELAKEYGPYE  |
| O08739 | 140   | YQRVTISGDY CAGITVEDYEQ |
| Q8K1X1 | 1070  | GKLAEGVQLLCLIDKAADACR  |
| Q9DCN1 | 287   | WHSRYKFCPTCGSATKIEEGG  |
| A2ASS6 | 14095 | VEEEATAVLECEVSRENAKVK  |
| P54729 | 269   | LLDADRYFCECKELLDTVDNY  |
| Q810L3 | 603   | RITGNTVLCYCCGLRSFREL   |
| Q8VCT3 | 130   | QALCVAFRQPCGAADRFELEL  |
| Q04760 | 19    | GGLTDEAALS CCSDADPSTKD |
| P62932 | 124   | NIMKETPSEECLDTALALQDQ  |
| Q09161 | 320   | ERFVIEENLHCI IKSHWKERK |
| P19367 | 628   | TWTKGFKATDCVGHVVTLLR   |
| Q921G7 | 501   | DSDQLKPAKDCPTIEYKPDG   |
| A2ASS6 | 20504 | LKVSDVTKTSCHVSWAPPEND  |
| P85094 | 107   | GRSQLOSVLLCGIETQACILN  |
| Q9D1P4 | 5     | XXXXXXMALLCYNRGCGRFD   |
| Q8K4Q0 | 196   | MGSPSIFVYDCSNAGLIVKSF  |
| O70546 | 1234  | TVHWVQAIGWCNNIAWNVGPL  |
| Q6ZQ73 | 374   | SRPDLLPDFHCTLAPALIRRF  |
| P07742 | 352   | VETNQDWSLMCPNECPGLDEV  |
| O08739 | 47    | VMSLFTVPEDCPIGQKEAKER  |
| P19253 | 190   | QAEKNVEKKICKFTEVLKTNG  |
| P07814 | 1487  | KSLCIPFKPLCELQPGAKCVC  |
| P31939 | 575   | SAADKVVIEACDELGIILAHT  |
| P13489 | 45    | LDDCGLTEARCKDISSALRVN  |
| Q9D6M3 | 246   | GSAAAVAVNPCDVVKTRLQSL  |
| Q01433 | 123   | LDLRTSMDGKCKEIAEELFTR  |
| Q7TNG8 | 113   | GGVCAVQGGVCINLTHMDQIT  |
| Q8CDN6 | 64    | AVFLEVDVHQCQGTAAATNNIS |
| P26039 | 2196  | TAKAVAAGNSCRQEDVIATAN  |
| Q8R3F5 | 206   | GQRQSNFSFACLEAQEHCKSL  |
| Q8VBZ3 | 454   | REHRVAGIFPCPTFKDKSTYI  |
| Q92616 | 36    | RREILSELGKCVAGKDLPEGA  |
| Q8K297 | 407   | GRPLTKGELGCFLSHYNIWKE  |

---

---

|        |       |                                                           |
|--------|-------|-----------------------------------------------------------|
| A2ASS6 | 6705  | KDTGGVLGTS <b>C</b> ILECKVAGSS                            |
| Q9DB43 | 97    | PRNTAPAGYQ <b>C</b> PSCNGPIFPF                            |
| O00468 | 468   | QGPCDQAPSP <b>C</b> LGVQCAFGAT                            |
| P50991 | 221   | VKKLGGTIDD <b>C</b> ELVEGLVLTQ                            |
| P70398 | 2390  | YQKRAYQCI <b>K</b> CMVALFSSCPV                            |
| Q11011 | 390   | SWIEYLCVDH <b>C</b> FPEYDIWTQF                            |
| Q9BY44 | 377   | PDGEHILTAT <b>C</b> APRLRVNNGY                            |
| P07814 | 1448  | DSGKIVQIPF <b>C</b> GEIDCEDWIK                            |
| A2ASS6 | 19587 | PSPSSDPIK <b>A</b> CRPIKPPGPPI                            |
| Q9CPZ8 | 77    | YYNDPAFYEE <b>C</b> KLEYLKEREE                            |
| P78527 | 90    | ECREEILKFL <b>C</b> IFLEKMGQKI                            |
| O70468 | 905   | GGLDGYSVEY <b>C</b> QEGCSEWTPA                            |
| P21980 | 211   | PKFLKNAGR <b>D</b> CSRRSSPVYVG                            |
| P98156 | 205   | AHEFQCSTSS <b>C</b> IPLSWVCDDD                            |
| Q8CI94 | 319   | IRRFKSSRF <b>G</b> CRDPVRTCFET                            |
| Q8K1X1 | 363   | TKTVRPF <b>S</b> MVCCPVNENAAAL                            |
| Q3TXS7 | 217   | NLEKPDFIN <b>V</b> CQCLIFLDDPQ                            |
| Q9R1V6 | 392   | KRKLASGE <b>C</b> KCEDTWSGCIMG                            |
| Q8K1X1 | 1135  | KALLVLLSL <b>G</b> CFVSV AETLHS                           |
| Q9DCZ1 | 222   | LKGHIISD <b>G</b> GCTCPGDVAKAF                            |
| Q9BXJ9 | 58    | TLAMKGLTL <b>N</b> CLGKKEEAYEL                            |
| Q60759 | 375   | EMVSMLKR <b>N</b> CGKALDIARQA                             |
| Q91V76 | 187   | RRTGELNF <b>V</b> SCMRQTL EEHYG                           |
| P11499 | 412   | KVIRKNIV <b>K</b> CLELFSELAED                             |
| Q9NYY3 | 83    | IVDPTTG <b>K</b> R <b>C</b> RGKVLGKGGF                    |
| P49327 | 2312  | YRVAGYS <b>Y</b> G <b>C</b> VAFEMCSQLQ                    |
| Q8R1S0 | 13    | ARIGSMAG <b>L</b> CVRWSSAQLA                              |
| O09061 | 223   | DVYTGDA <b>L</b> RICIVTKEGIREE                            |
| A2ASS6 | 21629 | RKSWSTV <b>T</b> T <b>C</b> SKTSFRVSNL                    |
| P00403 | 35    | DHALMIIF <b>L</b> ICFLVLYALFLT                            |
| Q8TCG1 | 280   | YLTRYEH <b>F</b> SSCLHQVLGLLNG                            |
| Q8BIJ6 | 609   | IWFDSG <b>T</b> SW <b>S</b> CVLQDTQQRAD                   |
| Q62523 | 465   | YHPQC <b>F</b> TCV <b>V</b> CACPLEGTSFI                   |
| Q3TL44 | 713   | LAGVRMT <b>P</b> L <b>K</b> CTVVASVLGSG                   |
| O70433 | 10    | XMTERFD <b>C</b> HHCNESLYGK <b>Y</b> I                    |
| Q3UZY0 | 513   | RQMSQ <b>H</b> REN <b>C</b> LAERMAILQA                    |
| Q8R5K2 | 631   | IVTYD <b>L</b> LS <b>V</b> ICHHGTASSGHY                   |
| P26039 | 1363  | CTQQAP <b>G</b> Q <b>K</b> ECDNALRQLETV                   |
| O08529 | 498   | TFEPHKD <b>G</b> DF <b>C</b> IRVFSEKKAD                   |
| Q32MW3 | 154   | VTVLVD <b>K</b> ID <b>M</b> CKHLSPEQDI                    |
| P17405 | 607   | LSARAD <b>S</b> PAL <b>C</b> RHLMPDGSLP                   |
| P00492 | 66    | EMGGH <b>H</b> IVAL <b>C</b> VLKGGYKFFA                   |
| Q6PDY2 | 206   | PPYDPED <b>G</b> RD <b>C</b> HYYRVVEPIR                   |
| Q99N94 | 218   | EPI <b>T</b> RWGE <b>Y</b> W <b>C</b> DVTVNGLDTV          |
| Q96EP5 | 39    | YFSQ <b>Y</b> GEV <b>V</b> D <b>C</b> VIMKDKTTNQ          |
| P50462 | 147   | GKP <b>W</b> H <b>K</b> TC <b>F</b> R <b>C</b> AICGKSLEST |
| Q9NYY3 | 347   | GFT <b>P</b> DRL <b>S</b> SS <b>C</b> CHTVPDFHLS          |
| P54310 | 396   | EAP <b>F</b> PRA <b>L</b> EE <b>C</b> FFAYCWAVKH          |
| P53811 | 191   | LANT <b>P</b> DC <b>P</b> RM <b>C</b> AYKLVTIKFK          |
| P23368 | 428   | ALS <b>N</b> PTA <b>Q</b> AE <b>C</b> TAE <b>E</b> AYTLTE |
| Q99683 | 250   | PN <b>F</b> ELL <b>L</b> GP <b>I</b> CLPLVDRFIQL          |
| A2ASS6 | 16766 | LEGLTY <b>V</b> FR <b>V</b> CAENAAGPGKF                   |

---

---

|        |       |                                                                                        |
|--------|-------|----------------------------------------------------------------------------------------|
| P97494 | 152   | CTITSFPRLGCPGF <sup>C</sup> TLPEHRP                                                    |
| Q14139 | 450   | AALLKLCQPFCKPRSSRLLTF                                                                  |
| A2ASS6 | 20411 | MRKLVVVRAGCPIRLFAIVRG                                                                  |
| P08113 | 645   | VVSQRLTESPCALVASQYGWS                                                                  |
| Q8BG51 | 157   | IMNQYTEIETC <sup>V</sup> VECSAKNLKN                                                    |
| P97390 | 145   | HLFSLNILGCCQGRNWDPAQL                                                                  |
| Q6NZJ6 | 1516  | VRARLLQKYL <sup>C</sup> DEQKELQALY                                                     |
| Q9NVM4 | 136   | VTVGPEGDMP <sup>C</sup> RANILVTELF                                                     |
| Q9Y3C8 | 165   | QKGVIOHKEKCNQXXXXXXXXXX                                                                |
| P26039 | 1392  | QPINDMSYFGCLDSVMENSKV                                                                  |
| Q8R143 | 117   | LLGITVCCCY <sup>C</sup> CRRKKS <sup>R</sup> KPD                                        |
| P17812 | 243   | FCHVEPEQVIC <sup>V</sup> H <sup>D</sup> VSS <sup>I</sup> YRV                           |
| P00492 | 23    | DEPGYDLDLF <sup>C</sup> IPNH <sup>Y</sup> AEDLE                                        |
| Q00610 | 39    | TLTMESDKFIC <sup>I</sup> REKVGEQAO                                                     |
| Q6ZQ73 | 304   | DPHVPNVTS <sup>L</sup> CLQYMKHDPNY                                                     |
| P97311 | 393   | GTSLRGDIN <sup>V</sup> CI <sup>V</sup> GDPSTAKS                                        |
| P10518 | 132   | CLCPYTSHGH <sup>C</sup> GLLSENGAFL                                                     |
| A2ASS6 | 20821 | SNITNYIVEK <sup>C</sup> DVSRGDWVTA                                                     |
| Q8NBI5 | 63    | PIGNATGQAD <sup>C</sup> KAQDERFSLI                                                     |
| P53569 | 595   | AFVKRLLQVT <sup>C</sup> TQMP <sup>P</sup> FFICGA                                       |
| Q8BH61 | 315   | SSETPVRYGQ <sup>C</sup> WVFAGVFNTF                                                     |
| Q9DCZ1 | 127   | LEAVPQVKFIC <sup>L</sup> DVANGYSEH                                                     |
| P35579 | 1379  | MKKKMEDSVG <sup>C</sup> LETAE <sup>E</sup> VKRK                                        |
| P12004 | 148   | KMPSGEFARIC <sup>R</sup> DL <sup>S</sup> HIGDAV                                        |
| O70325 | 16    | LSRLLKPALL <sup>C</sup> GALAAPGLAG                                                     |
| Q60597 | 231   | EFMFINDLEQ <sup>C</sup> QWIRQKFETP                                                     |
| Q99439 | 175   | VIGLQMG <sup>T</sup> NK <sup>C</sup> ASQSGMTAYG                                        |
| Q922B2 | 203   | QAI <sup>F</sup> R <sup>L</sup> QSGI <sup>C</sup> H <sup>L</sup> FRET <sup>L</sup> INK |
| A6H611 | 279   | FLYPNADQLK <sup>C</sup> LEELLSSRDL                                                     |
| P70388 | 221   | KYLKQ <sup>N</sup> KEKAC <sup>E</sup> IRDQITSKE                                        |
| P54822 | 173   | AQLTTVGKRC <sup>L</sup> WIQDL <sup>C</sup> MDL                                         |
| P33992 | 207   | CNTDQAGRPK <sup>C</sup> PLDPYFIMPD                                                     |
| Q71RI9 | 244   | ADLCVKHDTL <sup>C</sup> ISDEVYEWLV                                                     |
| P21817 | 2232  | EIRFPKMVTS <sup>C</sup> CRFLCYFCRI                                                     |
| P12814 | 476   | YYD <sup>S</sup> PSVNARC <sup>Q</sup> KICDQWDNL                                        |
| O89103 | 140   | ASKSSCIFKRC <sup>V</sup> SLILDLSLT                                                     |
| Q3TXS7 | 141   | EGIVNKMFQR <sup>C</sup> LDDH <sup>K</sup> YKQAI                                        |
| O60443 | 407   | PDSAAALLGT <sup>C</sup> CKLQIIP <sup>T</sup> LC                                        |
| O70305 | 91    | RPGSRLLGVC <sup>G</sup> PPRPFV <sup>V</sup> VL                                         |
| Q8JZN5 | 331   | KLIELTAEYAC <sup>T</sup> RKQFN <sup>R</sup> NLS                                        |
| P50991 | 414   | SIHDALCVIR <sup>C</sup> LVKKRALIAG                                                     |
| Q99KP6 | 230   | SIPGILALDL <sup>C</sup> PSDTNKILT <sup>G</sup>                                         |
| Q9Y6I9 | 182   | IYQEDQIHFM <sup>C</sup> PLARQGD <sup>F</sup> YV                                        |
| P30153 | 504   | NYLHRMTTLF <sup>C</sup> INVLSEVCGQ                                                     |
| Q9Z1Z0 | 344   | INTVSEVIRG <sup>C</sup> QVNQDYFASV                                                     |
| O35643 | 924   | GNPSFTLSLK <sup>C</sup> RAPEV <sup>S</sup> QH <sup>V</sup> Y                           |
| Q9H0C8 | 325   | TPNDRFILLAC <sup>D</sup> GLFKVFT <sup>P</sup> E                                        |
| P15105 | 99    | FRKDPNKLVL <sup>C</sup> EVFKY <sup>N</sup> RKPA                                        |
| Q9H0C8 | 367   | SAADARYEAC <sup>N</sup> RLANKAV <sup>Q</sup> R                                         |
| Q9ET80 | 318   | WANNKRHGYG <sup>C</sup> TVFPDGS <sup>K</sup> EE                                        |
| P06213 | 311   | CHQYVIHNNK <sup>C</sup> IPECPSGY <sup>T</sup> M                                        |
| Q91VR2 | 13    | SRASVVGLSAC <sup>A</sup> VQPQWI <sup>Q</sup> VR                                        |

---

---

|        |       |                                                                                                                |
|--------|-------|----------------------------------------------------------------------------------------------------------------|
| Q811U4 | 509   | KKFDLSYDLN <b>C</b> HKLCSD <b>FQ</b> ED                                                                        |
| O00468 | 399   | CQGRDQ <b>C</b> PE <b>P</b> CR <b>F</b> NAV <b>C</b> LSRR                                                      |
| Q99683 | 643   | FQIY <b>F</b> CTEL <b>H</b> CK <b>K</b> FFEMVNTI                                                               |
| P49717 | 305   | IP <b>E</b> M <b>Q</b> E <b>A</b> F <b>F</b> Q <b>C</b> Q <b>V</b> CA <b>H</b> T <b>T</b> R <b>V</b> E         |
| Q99NB1 | 107   | LGGQ <b>L</b> NV <b>S</b> V <b>N</b> CLDQ <b>H</b> VQ <b>K</b> S <b>P</b> E                                    |
| Q9DBM2 | 231   | Q <b>Y</b> PGRL <b>A</b> P <b>E</b> T <b>C</b> V <b>R</b> S <b>V</b> Q <b>A</b> S <b>V</b> K <b>H</b>          |
| P17427 | 710   | G <b>S</b> ED <b>N</b> F <b>A</b> R <b>F</b> V <b>C</b> K <b>N</b> NG <b>V</b> L <b>F</b> EN <b>Q</b>          |
| P33992 | 219   | LD <b>P</b> Y <b>F</b> IM <b>P</b> DK <b>C</b> K <b>C</b> V <b>D</b> F <b>Q</b> TL <b>K</b> L                  |
| O15519 | 310   | PE <b>H</b> RD <b>Y</b> DS <b>F</b> V <b>C</b> V <b>L</b> VS <b>R</b> GG <b>S</b> Q <b>S</b>                   |
| P23610 | 62    | Q <b>L</b> GRE <b>L</b> RA <b>Q</b> E <b>C</b> LP <b>Y</b> AA <b>W</b> C <b>Q</b> LA                           |
| P28474 | 268   | T <b>D</b> GG <b>V</b> D <b>Y</b> S <b>F</b> E <b>C</b> I <b>G</b> NV <b>K</b> VM <b>R</b> SA                  |
| O60502 | 215   | Y <b>L</b> GE <b>P</b> ET <b>F</b> LF <b>C</b> P <b>T</b> E <b>Y</b> CG <b>T</b> FC <b>Y</b>                   |
| O70572 | 251   | LY <b>K</b> AV <b>S</b> E <b>F</b> H <b>V</b> CC <b>E</b> T <b>L</b> K <b>T</b> T <b>T</b> GC                  |
| Q8VBW6 | 395   | S <b>N</b> SA <b>F</b> LR <b>V</b> VR <b>C</b> RS <b>L</b> A <b>E</b> E <b>Y</b> GLD                           |
| P26039 | 1202  | VT <b>Q</b> AL <b>N</b> RC <b>V</b> S <b>C</b> LP <b>G</b> ORD <b>V</b> D <b>N</b> A                           |
| Q16665 | 359   | DL <b>I</b> FS <b>L</b> Q <b>Q</b> TE <b>C</b> V <b>L</b> K <b>P</b> V <b>E</b> SS <b>D</b> M                  |
| P04075 | 290   | AS <b>I</b> N <b>L</b> NA <b>I</b> N <b>K</b> CP <b>L</b> L <b>K</b> P <b>W</b> AL <b>T</b> F                  |
| O08529 | 105   | TD <b>I</b> C <b>Q</b> GA <b>L</b> GD <b>C</b> W <b>L</b> LA <b>I</b> AS <b>L</b> T                            |
| Q9Z1Q9 | 562   | DP <b>R</b> Y <b>Q</b> HL <b>K</b> G <b>K</b> CV <b>V</b> HP <b>F</b> LS <b>R</b> SL                           |
| P14550 | 187   | SV <b>R</b> PA <b>V</b> L <b>Q</b> VE <b>C</b> HP <b>Y</b> LA <b>Q</b> NE <b>L</b> I                           |
| P10833 | 213   | PS <b>A</b> PR <b>K</b> K <b>D</b> GG <b>C</b> PC <b>V</b> LL <b>X</b> XXXX                                    |
| Q5SSW2 | 737   | ST <b>T</b> LI <b>Y</b> P <b>T</b> E <b>Y</b> CS <b>V</b> PG <b>G</b> FN <b>K</b> PP                           |
| Q9WVQ5 | 210   | GET <b>W</b> E <b>K</b> AK <b>T</b> M <b>C</b> E <b>C</b> Y <b>D</b> Y <b>L</b> FD <b>I</b> A                  |
| P33992 | 221   | P <b>Y</b> F <b>I</b> M <b>P</b> DK <b>C</b> K <b>C</b> V <b>D</b> F <b>Q</b> TL <b>K</b> L <b>Q</b> E         |
| A2ASS6 | 1018  | A <b>F</b> A <b>E</b> DS <b>G</b> R <b>F</b> T <b>C</b> SA <b>V</b> NE <b>A</b> GT <b>V</b> S                  |
| Q62261 | 73    | W <b>V</b> NS <b>H</b> LA <b>R</b> V <b>S</b> CR <b>I</b> T <b>D</b> LY <b>T</b> DL <b>R</b>                   |
| Q6PDN3 | 791   | E <b>I</b> LL <b>K</b> NR <b>V</b> GE <b>C</b> SC <b>Q</b> V <b>S</b> L <b>M</b> L <b>H</b> N                  |
| Q9Z1Z0 | 383   | V <b>N</b> ER <b>Q</b> PF <b>V</b> LR <b>C</b> AV <b>L</b> Y <b>C</b> F <b>Q</b> C <b>F</b> L                  |
| P78527 | 1767  | ML <b>L</b> EL <b>M</b> TE <b>V</b> L <b>C</b> RE <b>Q</b> Q <b>H</b> VM <b>E</b> EL                           |
| Q6PDN3 | 840   | D <b>G</b> DR <b>H</b> GT <b>L</b> RP <b>C</b> WP <b>A</b> R <b>G</b> Q <b>G</b> W <b>P</b> E                  |
| Q15149 | 4071  | N <b>L</b> Q <b>K</b> F <b>L</b> E <b>G</b> T <b>S</b> C <b>I</b> AG <b>V</b> F <b>V</b> D <b>A</b> T <b>K</b> |
| P61962 | 268   | P <b>V</b> AR <b>L</b> NN <b>H</b> RA <b>C</b> V <b>N</b> G <b>I</b> A <b>W</b> AP <b>H</b> S                  |
| Q7L8L6 | 689   | MEM <b>A</b> GL <b>C</b> PA <b>A</b> CM <b>Q</b> T <b>P</b> RM <b>K</b> L <b>A</b> V                           |
| Q9DCS9 | 77    | Q <b>Y</b> RR <b>V</b> PD <b>I</b> TE <b>C</b> KE <b>G</b> D <b>V</b> L <b>C</b> I <b>Y</b> E                  |
| Q9JHU4 | 4168  | TF <b>S</b> S <b>I</b> P <b>V</b> S <b>R</b> I <b>C</b> K <b>S</b> P <b>N</b> ER <b>A</b> R <b>L</b> Y         |
| O43447 | 174   | K <b>P</b> K <b>L</b> P <b>V</b> V <b>I</b> S <b>Q</b> C <b>G</b> EM <b>X</b> XXXXXX                           |
| Q9DCN1 | 247   | A <b>E</b> EF <b>K</b> Q <b>R</b> H <b>E</b> N <b>C</b> Y <b>F</b> L <b>H</b> PP <b>M</b> P <b>A</b> L         |
| A2ASS6 | 30983 | RL <b>N</b> W <b>V</b> I <b>V</b> E <b>G</b> E <b>C</b> L <b>T</b> AS <b>Y</b> V <b>V</b> T <b>R</b> L         |
| P68104 | 370   | V <b>L</b> D <b>C</b> HT <b>A</b> HI <b>A</b> CK <b>F</b> A <b>E</b> L <b>K</b> E <b>K</b> ID                  |
| Q9CZ13 | 7     | XXXX <b>M</b> A <b>A</b> SA <b>V</b> CR <b>A</b> AC <b>S</b> G <b>T</b> Q <b>V</b> L                           |
| Q7L8L6 | 475   | F <b>N</b> Q <b>Y</b> PE <b>H</b> L <b>P</b> T <b>C</b> LL <b>G</b> L <b>A</b> F <b>L</b> E <b>Y</b> F         |
| P21333 | 1225  | G <b>T</b> H <b>T</b> I <b>T</b> Y <b>I</b> PL <b>C</b> PG <b>A</b> Y <b>T</b> V <b>T</b> I <b>K</b> Y         |
| A2ASS6 | 17717 | L <b>K</b> V <b>S</b> D <b>I</b> TR <b>G</b> SC <b>R</b> LS <b>W</b> K <b>M</b> P <b>D</b> DD                  |
| Q8CG76 | 362   | D <b>Q</b> AW <b>N</b> M <b>V</b> A <b>H</b> E <b>C</b> PN <b>Y</b> FR <b>X</b> XXXX                           |
| O09110 | 120   | DL <b>D</b> IN <b>M</b> RT <b>V</b> D <b>C</b> F <b>Y</b> TV <b>T</b> F <b>Y</b> G <b>A</b> L                  |
| Q9NX47 | 97    | DL <b>A</b> DR <b>L</b> IS <b>K</b> AC <b>P</b> FA <b>A</b> AG <b>I</b> M <b>V</b> G                           |
| P78527 | 1954  | A <b>Y</b> NC <b>A</b> IS <b>V</b> IC <b>C</b> V <b>F</b> N <b>E</b> L <b>K</b> F <b>Y</b> Q <b>G</b>          |
| P40227 | 366   | G <b>E</b> E <b>K</b> FT <b>F</b> IE <b>K</b> C <b>N</b> N <b>P</b> RS <b>V</b> T <b>L</b> L <b>I</b>          |
| P35285 | 194   | R <b>Q</b> P <b>S</b> E <b>P</b> K <b>R</b> SC <b>C</b> XXXXXXXXXXXX                                           |
| Q8BFQ4 | 141   | I <b>R</b> L <b>W</b> DL <b>R</b> SP <b>N</b> C <b>Q</b> GL <b>M</b> H <b>L</b> Q <b>G</b> K <b>P</b>          |
| P47809 | 380   | ERT <b>V</b> E <b>V</b> AC <b>Y</b> V <b>C</b> K <b>I</b> L <b>D</b> Q <b>M</b> P <b>A</b> T <b>P</b>          |
| P70388 | 48    | NG <b>A</b> G <b>K</b> TT <b>I</b> IE <b>C</b> L <b>K</b> Y <b>I</b> CT <b>G</b> D <b>F</b> P                  |

---

---

|        |       |                         |
|--------|-------|-------------------------|
| P22102 | 564   | GIAKACGKAGCALLGGETAEM   |
| Q99KC8 | 163   | YQLSEQSANSCLNIQKPTVPL   |
| O00170 | 90    | MREGEIAQFLCDIKHVVLVPL   |
| Q7TQ48 | 9     | XXMKALLLLCCFLASLLLSGO   |
| P70398 | 1908  | YKFDDGDVTECKMDDDEEMKN   |
| Q08211 | 608   | DDGGEDDDANCNLICGDEYGP   |
| O60502 | 181   | LLFDDIDHNMCAADKEVFSSF   |
| Q8BKT7 | 507   | EHGIVPVTSDCQDLFPAKVVS   |
| Q99714 | 58    | EAQAKKLGNNCVFAPADVTSE   |
| P40936 | 76    | GPTIYQLLSACEVFREIIVTD   |
| Q810L3 | 641   | SRPDCYWGRNCRTQVKAHAM    |
| P32921 | 10    | XMADMPSGESCTSPLELFNSI   |
| Q15274 | 27    | ALVDSWLREDCPGLNYAALVS   |
| Q9WU78 | 122   | ALASLGYEKS CVLFNCAALAS  |
| Q6PAR5 | 275   | FIGYLKQNTYCFPHSLRWIVS   |
| Q14684 | 155   | FLDVLMEVLCPE SQSPNGVR   |
| Q7KZF4 | 228   | LVTVMLSGIKCPTFRREADGS   |
| Q60714 | 392   | QIGEFYGATECNCSIANMDGK   |
| Q9ER72 | 472   | AQSEAYFENDCWVRYFLHTGH   |
| P70398 | 2107  | SNRFSEYLLECP SAEVRGAF A |
| Q62234 | 1013  | APSTVSECFKCEEWTIAVPGP   |
| Q8JZQ2 | 27    | GLPPLLVPRGCLGPDRRCLR    |
| Q9R112 | 379   | PIKKYDGYTSCPLVTGYNRVI   |
| Q9JHU4 | 2184  | TALREELKKVCQEMYLTYGDG   |
| Q9D7I5 | 23    | GVLLDISGVLCDSSASGATAI   |
| Q62418 | 321   | APVSRPAAGVCEEPA PSTLSS  |
| Q8BWT1 | 92    | ETGALTLNRLCGSGFQSIVSG   |
| A2ASS6 | 20798 | FDISEIDADACSLSWHIPLED   |
| O70546 | 1164  | SVNINIGPGDCEWFVVPEGYW   |
| Q9UQM7 | 373   | NGDFESYTKMCDPGMTAFEPE   |
| Q7KZF4 | 96    | LRKKLIGKEVCFTIENKTPQG   |
| P34932 | 140   | ESVLKKPVVDCVVSVP CFYTD  |
| Q71FD7 | 185   | LPEREVSTDVCGFCHKPVSPR   |
| P98156 | 312   | DCVDGSDEVNCKNVNQCLGPG   |
| Q501J6 | 505   | NNPNLMYQDECDRRLRGVKDG   |
| O70546 | 367   | WMDLGTLYESC NQPQDAIKCY  |
| Q99L45 | 303   | TRLYFLQCETCHSRCSVASIK   |
| Q99798 | 451   | GIVLANACGPCIGQWDRKDIK   |
| P31327 | 1337  | CEMASTGEVACFGEGIHTAFL   |
| Q8R3F5 | 233   | CQVSNYLFPCRVISGHLEAL    |
| Q02257 | 33    | DSGIHSGVNTCVPSVSSKGIM   |
| Q3UMB9 | 344   | KKFYKSLLDICKKVPAITLTA   |
| Q15527 | 127   | QKQGV EYVPA CLVHRRRRRED |
| A2ASS6 | 15866 | EPSEPSDPVLCREKLYPPSPP   |
| O35459 | 158   | YQKTFTVIEKCPKPVIAA IHG  |
| Q5JTH9 | 517   | PVMRKCLQSLCDLRLSPHFPH   |
| P54136 | 638   | LKVNMRMLLCEAVA AVMAKG   |
| A2ASS6 | 6571  | VEPANAGKYICQVKNDGGVRE   |
| P11172 | 72    | QNAGISFDTVCGVPYTALPLA   |
| P30042 | 153   | LSTFAVDGKDKVNKEVERVL    |
| Q8K4Z3 | 109   | SKSPPTVLVICGPGNNGDGL    |
| P49411 | 387   | VMFSLTWDMACRIILPPEKEL   |

---



---

|        |       |                          |
|--------|-------|--------------------------|
| Q8N0X7 | 562   | VWQGLECAAKCIVNNVSAETV    |
| Q9CXY6 | 271   | PLALNVAYRRCLQILAAGLFL    |
| P13489 | 209   | CQLEALKLES CGVTS D NCRDL |
| A2ASS6 | 22710 | RKSYSTVTTKCHKCTYKVTGL    |
| Q7TNV0 | 226   | GTTRKSKQTKCPEILSDESSS    |
| P62835 | 141   | GQNLARQWCNCAFLESSAKSK    |
| Q8VDC0 | 577   | LFYARFLSHFCHDQKMKVHRE    |
| P26039 | 116   | KTVTDMLMTICARIGITNHDE    |
| P78347 | 745   | QKVENLNFNEKCGEALGLKQAV   |
| Q9QXX4 | 438   | PLLAEIFAGGCAGGSQVIFTN    |
| O94979 | 589   | TGNFESAVDLCLHDNRMADAI    |
| O00429 | 446   | HEEMQRIIQHCSNYSTQELLR    |
| O00468 | 585   | PSECMLHVHACTHQISLHVAS    |
| O75153 | 732   | FSPGVRFPESCQDEV RDQKQL   |
| A2ASS6 | 8802  | NGINVIASQR CNIT TTEKSAI  |
| P50995 | 428   | LEEGMLAVVKCLKNTPAFFAE    |
| P00750 | 91    | VPVKSCSEPRCFNGGTCQQAL    |
| P16546 | 2441  | QNLTREQADYCVSHMKPYVDG    |
| Q6P8J7 | 288   | GNMKRVFERFCRGLKEVERLI    |
| Q99KP6 | 351   | LTKVTDETS GCSLTCAQFHPD   |
| Q9CXT8 | 454   | AVDAETVRRVCTKYIHDKSPA    |
| P12382 | 170   | GLVGSIDNDFCGTDMTIGTDS    |
| P97372 | 118   | KPEVWTLKEKCILVITWIQHL    |
| O14980 | 623   | EILNNINTIICDLQPOQVHTF    |
| Q9WUA3 | 722   | SDDSI CVLGI CKRDLLFQPVA  |
| O43143 | 750   | VLTTKNYIRTCTDIKPEWLVK    |
| Q3B7Z2 | 747   | ECKEKQDWGSCPDI FXXXXXX   |
| P62878 | 42    | LWAWDIVVDNCAICRNHIMDL    |
| Q5UIP0 | 2169  | NDSPSGMQTRCVWSPLASPST    |
| Q8BIJ6 | 33    | GPARLPSRLGCLGMTRRLVVR    |
| Q14181 | 392   | LDAKHEQVENCLLTSPFEDIF    |
| Q8BG51 | 502   | SEFLTEAETICD VVCLVYDVT   |
| Q3ULD5 | 453   | GSYGAGNYGMCGRAYS PRFLY   |
| Q3UH68 | 987   | RRKSI SGKKL CSSCGLTLGKG  |
| P49327 | 1564  | AQPTCPGAQLCTVYYASLNFR    |
| Q60597 | 39    | AAIRTFQQIRCYSAPVAAEPF    |
| P62932 | 49    | HLLCGATFHMCKESEHTLLCP    |
| P26039 | 243   | DKACEFAGFQCQIQFGPHNEQ    |
| P21333 | 1018  | IVGPSGAAVPCKVEPGLGADN    |
| Q8BP47 | 176   | YLQCVLSDDLQC YNGVVLST    |
| P62932 | 669   | VTSMSEHLKTC PFNIVERKTD   |
| Q9D7I5 | 88    | EEVTAPAPATCQILKERGLRP    |
| P26039 | 719   | CALSTSQLVACTKVVAPTISS    |
| Q924X2 | 562   | LPFGKGLIKK CRTSPDAFVQI   |
| P70670 | 149   | APHSVQKSSVCP PHPLTSPPS   |
| P62932 | 58    | MCKESEHTLLCPLEQVPCLNS    |
| Q9R1V6 | 399   | ECKCEDTWSG CIMGDTGY YLP  |
| Q99KC8 | 199   | QHGIERVQSNCSLSPIQY LTD   |
| Q08J23 | 321   | AEGGRMVYSTCSLNPIEDEAV    |
| O89103 | 366   | VNTLGSFHCECWVGYQPSGPK    |
| Q6PIE5 | 987   | MYPLKVTWWFCAF PYSLLIFI   |
| P55060 | 853   | AVGITKLLTECPPMMDTEYTK    |

---

---

|        |       |                        |
|--------|-------|------------------------|
| P55036 | 58    | NVGLITLANDCEVLTTLTPDT  |
| P16675 | 83    | VVLWLNNGGPGCSSLDGLLTHE |
| P34914 | 154   | SQHFDFLIESCQVGMIKPEPQ  |
| P63167 | 2     | XXXXXXXXXMCDRKAVIKNAD  |
| Q99P88 | 195   | TGSGILNDSMCGGMQLLPDPL  |
| Q99836 | 280   | FITVCDYTNPCTKSWFWTRLA  |
| P02730 | 843   | MHLFTGIQIICLAVLWVVKST  |
| Q9ET26 | 111   | LSKIRAHVTSCKSKYQNYIMEG |
| P53396 | 845   | RKPASFMTSICDERGOELIYA  |
| Q14181 | 556   | YFVKDVLGCVVNPGRLLTKGQ  |
| P07237 | 343   | ELTAERITEFCHRFLEGKIKP  |
| Q05586 | 436   | VNGDPVKKVIC TGPNDTSPGS |
| P35821 | 32    | DIRHEASDFPCKVAKLPKNKN  |
| O95573 | 503   | NTGRVGAPLVCCEIKLKNWEE  |
| P14873 | 2079  | PSEARQDVDLCLVSSCEFHKHP |
| Q8BVE3 | 312   | RQEYALAMIQCKVLKQLENLE  |
| Q8BGQ7 | 901   | TVDNEAGKITCLCQVPQNAAN  |
| O89103 | 261   | GPLCVSPKFGCSFNNGGCQQD  |
| Q9EQ80 | 336   | AASKGINVILCEHSNTERGFL  |
| Q9ET26 | 95    | IESIETSCHGCRKNFILSKIR  |
| P97807 | 374   | IMPGKVNPTQCEAMTMVAAQV  |
| P58404 | 589   | DPSSSGPSCLCTFPMDGEHGI  |
| P62736 | 12    | CEEEDSTALVCDNGSGLCKAG  |
| Q921M4 | 615   | AOGLQEQRDQCLSHLQOYAAA  |
| P48643 | 429   | VYGGGAAEISCALAVSQEADK  |
| Q08211 | 973   | ILINSGFPEDCLLTQVFTNTG  |
| Q60770 | 501   | DSKEWPYCSRCPAVWNGSGAV  |
| P21817 | 565   | ASSGILEVLYCVLIESPEVLN  |
| Q9ESD7 | 1255  | GADEFMGRICQPSLERMPRL   |
| Q8VCI5 | 296   | SGPPGANGEQCLIMXXXXXXXX |
| Q9D7P6 | 131   | IKNTDIAKELCLPPVKLHCSM  |
| Q6PGB6 | 61    | FNDIAVGAVCCRVDHSQNQKR  |
| Q9R0H0 | 418   | PNIYVTFTPACTFEAGENTVMM |
| Q6ZWY3 | 64    | VLCVGCSTVLCQPTGGKARLT  |
| P23975 | 520   | GFRPGLYWRLCWKFVSPAFL   |
| Q8BWM0 | 205   | NDQGKEVTEFCNKYWLMLDEK  |
| Q8R3F5 | 223   | CKSLGIENPVCQVSNYLFPCD  |
| P98156 | 421   | INLKGGYKCECSRGYQMDLAT  |
| A2ASS6 | 30448 | LTGITNQLITCKAGSTFTIDV  |
| O54931 | 856   | DSSYTSKLLSCKVTSEVLEAT  |
| A2ASS6 | 9210  | ASMADAGLYTCKATNDAGSAL  |
| Q9UQM7 | 199   | PYGKPVDLWACGVILYILLVG  |
| A2ASS6 | 29480 | PEDDGGGEITCYSIEKREASQ  |
| Q64436 | 240   | ESEPQTRSPECTHESPLETRN  |
| Q9NVM4 | 623   | LWMEYHLTPECTLSTGLLEPA  |
| O15382 | 22    | RKLLSVPWLLCGPRRYASSSF  |
| P35754 | 26    | VVFIKPTCPYCRRAQEILSQL  |
| O35459 | 170   | KPVIAAIHGGCIGGGVDLVSA  |
| A2ASS6 | 27791 | TSVTKDSMTLCWSRPETDGG   |
| P00750 | 291   | LKNRRLTWEYCDVPSCSTCGL  |
| P98156 | 246   | HTKCPTSEIQCGSGECIHKKW  |
| Q86VP6 | 940   | ENIWALLLKHCECAEEGTRNV  |

---

---

|        |      |                         |
|--------|------|-------------------------|
| Q9CRA7 | 58   | DRAASEWLLRCGAKVRYCGHQ   |
| Q91WU5 | 376  | TGGCCGKRKNXXXXXXXXXX    |
| A2ASS6 | 7675 | DGNEIISSPKQSSFADNVCT    |
| P32020 | 115  | HQLIQGGLANCVLALGF EKME  |
| Q8K298 | 807  | SKGSVTLSEICLPLKADFVCS   |
| P53996 | 133  | CGEFGHIQKDC TKVKCYRCGE  |
| Q6R5N8 | 777  | SLLDLDFDDAMCNFDLGKVYFL  |
| Q9WVJ2 | 182  | YYKDALRFLGCVDIKDLPVSE   |
| A2ASS6 | 4884 | VQISLGGKYTCLAENEAGSQT   |
| Q9CQM9 | 161  | FMKGTPOEPRCGFSKQMV EIL  |
| Q64514 | 456  | NGTSMSSPNACGGIALVLSGL   |
| Q71FD7 | 213  | KRQYHAQCFTCRTCRRQLAGQ   |
| P00750 | 509  | GGPQANLHDA CQGDSGGPLVC  |
| Q7KZF4 | 736  | GSYAPRRGEFCIAKFVDGEWY   |
| Q64310 | 81   | FLNLLGQLTGCVLVLSRNFVQ   |
| P19096 | 1464 | RKEPGGHRIRCILLSNLSNTS   |
| P21333 | 210  | ALVDSCAPGLCPDWDSWDASK   |
| Q6PIE5 | 241  | HENPLETRNICFFSTNCVEGT   |
| O75828 | 4    | XXXXXXXXMSSCSRVALVTGAN  |
| P21817 | 1150 | RPWQPGDVVGC MIDLTENTII  |
| P14873 | 1305 | GVTQAVVEEH CASPEEKTLEV  |
| B1AR13 | 110  | QETRTVALCTCKATQRPPYCD   |
| Q9R0P3 | 176  | YRSVSAFAPICNPVLC SWGKK  |
| Q99615 | 58   | YNYYTKAIDMCPKNASY YGNR  |
| Q8K2B3 | 305  | FHPTGIYGAGCLITEGCRGEG   |
| Q6NSR8 | 73   | PTDSCPLYLNCATVAALPSRV   |
| A2AVZ9 | 51   | NYFSEPCEQDCLLQSNVTGPS   |
| Q9D8B4 | 75   | AIGAMFGLTTCVSAQVREKPD   |
| P05455 | 18   | EKMAALEAKICHQIEYYFGDF   |
| Q7TNV0 | 352  | NLEEVMTKQICKEVYENYPAY   |
| Q8BKT7 | 208  | RKRLAEKYRECLSNKEKILKE   |
| P97478 | 34   | SEYGRGLIIRCHSSGMTLDNI   |
| Q6NSR8 | 357  | LVLADGVSYACKDLGADIIVD   |
| Q9GZT4 | 6    | XXXXXMCAQY CISFADVEKAH  |
| O70546 | 562  | SVSQPGVHTACPRQTLANGPF   |
| Q6R5N8 | 340  | RHGHLDMKTVCHLLGNLPKLE   |
| O00220 | 274  | IGSGCGGDPKCMDRVCFWRLG   |
| Q99J09 | 53   | LLGVSSLSGRCWVGS LWFFKD  |
| P70168 | 358  | AGVCLMLLSTCCEDDIVPHVL   |
| P28474 | 60   | YTLSGADPEGCFPVILGHEGA   |
| Q15149 | 3008 | NLTYLQLLERCVEDPETGLCL   |
| Q9DBC0 | 142  | PGTEPAAHCYCGHQFGQFAGQ   |
| P50991 | 337  | DIEREDIEFICKTIGTKPVAH   |
| O00468 | 814  | TCDPATGQCS CRPGVGG LRCD |
| P45952 | 116  | CLITEELAYGCTGVQTAIEAN   |
| P63318 | 66   | IWGIGKQGLQCQVCSFVVHRR   |
| P97447 | 101  | KCATREDSPRCKGCFKAIVAG   |
| Q13144 | 571  | LQRGKEENISCDNLVLEINSL   |
| P21333 | 574  | SPFEVKVGTECGNQKVRAGWP   |
| P06213 | 331  | MNSSNLLCTPCLGPCPKVCHL   |
| Q3UH68 | 1016 | NLYFHIQCFRCGICKGQLGDA   |
| O75828 | 26   | GIGLAIARELCRQFSGDVVLT   |

---

---

|        |       |                        |
|--------|-------|------------------------|
| Q91WD5 | 326   | FDVPIGSRGDCYDRYLCRVEE  |
| Q6PDY2 | 96    | LGVFLLKSGTCIPLHDHPGMH  |
| A2ASS6 | 22120 | MKANHVNVPCAF'TVTDLVEG  |
| Q9WU78 | 90    | PKFPFSENQICLTFTWKDAFD  |
| Q8BXG3 | 150   | YGEQVCYVLDCLAEAEALKYIG |
| Q9DC61 | 19    | ARLLRGSAVLCARPRFGSPA   |
| A2ASS6 | 17839 | GSPVTHYIVECLAWDPTGKKK  |
| O00468 | 513   | GSDGVTYGSACELEATACTLG  |
| P60603 | 27    | DRVKMGFVMGCAVGMAAGALF  |
| Q12931 | 261   | TKIIHLKSDCKEFSSEARVR   |
| Q62234 | 279   | VWEKENVKLHCSVAGWPEPRL  |
| Q9DCZ1 | 224   | GHIISDGGCTCPGDVAKAFGA  |
| Q6NXE6 | 201   | EADLTCSGIRCVRHACLKHEQ  |
| Q8BUV3 | 313   | VGSLKARLPSCSSTYSVSEVQ  |
| P42932 | 430   | AKQITSYGETCPGLEQYAIKK  |
| P40937 | 152   | IEKFTENTRFCLICNYLSKII  |
| Q8R5K2 | 850   | IDNTKIAVTKCGSVMLKQGAD  |
| P41250 | 231   | HLQKLMSDKKCSVEKKSEMES  |
| P16332 | 469   | EGIPKLRIEECAARRQARIDS  |
| Q6PAR5 | 690   | AAENVLGSLLCLPGSGSVLLD  |
| P14873 | 73    | IRSWDTNLIECNLDQELKLFV  |
| A2ASS6 | 21561 | GKYILTLENSCGKKEYTIVVK  |
| Q62095 | 54    | LRNRETSKGVCDKDSSGWSCS  |
| O94927 | 415   | KGNSASKTRLCRSPGEVLALV  |
| Q6IFX4 | 127   | ADLEDKIQEACSKALPILCPD  |
| Q8BK08 | 129   | LYGISWQFDPCKYQVEYDAY   |
| Q8BW75 | 297   | SRVPLGSVIKCMVYYKEPFWR  |
| P45952 | 95    | GLINAHIPESCGGLGLGTFDA  |
| Q8C1E7 | 12    | QSPPPDPLGDCLRNWEDLQOD  |
| Q9D517 | 104   | LNHNFEIDFLCGWTMCERFGV  |
| O75369 | 2154  | EIVPMGKNSHCVRFVPQEMGV  |
| Q29RF7 | 583   | LELLISPTCSCKQADICVREI  |
| Q64277 | 137   | YGKVGDFLSWCRQENASGLDY  |
| Q9R1V6 | 521   | REICSGNSSQCAPNVHKMDGY  |
| Q29RF7 | 532   | LHKQPTSEANCSAMFGKLMTI  |
| Q60714 | 394   | GEFYGATECNCSIANMDGKVG  |
| P12268 | 173   | IDFLKEEEHDCFLEEIMTKRE  |
| P17426 | 970   | TSKEPVSRLCELLAQQFXXX   |
| Q80UJ7 | 464   | SLTYKLALCLCMINFYHGGLK  |
| P53618 | 816   | DVSGAASDRNCVVLSDIHIDI  |
| Q9WVQ5 | 4     | XXXXXXXXMSGCQAQGDCCSRP |
| Q61024 | 13    | GIWALFGSDDCLSVQCLSAMK  |
| P06213 | 495   | ALKTNGDQASCENELLKFSYI  |
| Q8BFR6 | 240   | TLERWITKEECPLYNGGNVIL  |
| O70468 | 1120  | TVLEHYRRTHCVVSELIIGNG  |
| O14920 | 444   | WHSIQTLKEDCNRLQOQQRAA  |
| P78527 | 1919  | NELTKTLIKLCYDAFTENMAG  |
| O15519 | 393   | VEFKAQKRGLCTVHREADFFW  |
| Q3U1J4 | 680   | NVNLKEVNYMCPLNSDGYPDS  |
| Q9CR24 | 159   | QTQNOGYTHFCQGGHFSYTLP  |
| Q61151 | 71    | ELFLKKLQCCVIFDFMDTLS   |
| P17751 | 40    | ISGQWREPCVCTDLQRLEPGT  |

---

---

|        |      |                         |
|--------|------|-------------------------|
| Q8BXG3 | 88   | TNPGEQFYMFCTLAAWLINKT   |
| O88712 | 350  | TGRIPDSLKNCVNKDHLTAAT   |
| Q8WX93 | 1022 | IFEGMPVTFCTRVAGNPKPKI   |
| P53996 | 112  | CGKPGHLARCDHADEQKCYS    |
| P70388 | 681  | TQLTDENQSCCPVCQRFQTE    |
| P10605 | 179  | SGGVYN SHVGCCLPYTIPPCEH |
| O14744 | 42   | AVAKQGFDFLCMPVFHPRFKR   |
| Q8K2M0 | 290  | NFSEDTRPSPCYQLAQRTRT    |
| P23528 | 39   | VKKRKKAVLFLCISEDKKN IIL |
| Q8QZZ7 | 13   | LSQQLDLFPECRVTL LLLFKDV |
| Q9CZR8 | 14   | LRS LRFFPVACTGRSARAVLL  |
| P49717 | 571  | ALVLS DNGICCIDEFDKMNES  |
| A2ASS6 | 8215 | VKQDEYTRYECKIGGSPEIKV   |
| Q6ZPY7 | 927  | GKWGIKANCP CISRQSKSVLR  |
| Q9DBL1 | 22   | GGLLR RRFPTCLSPWKIPPRV  |
| Q12879 | 870  | LFSISRGIYSCIHGVHIEEK    |
| Q9JKX6 | 130  | GEVAECSPAVCMDPGLSNCTT   |
| Q15369 | 74   | EIPSHVLSKVCMYFTYKVRYT   |
| Q9UNE7 | 69   | VAVYYTNRALCYLKMQQHEQA   |
| P97823 | 169  | SANRDISVLQCHGDCDPLVPL   |
| Q8CGY6 | 84   | SADIKALYRRCQALEHLGKLD   |
| Q8K1X1 | 39   | WGWQGLIAYGCHSLVVVIDSN   |
| Q96I24 | 148  | KRLLGQIVDRCRNGPGFHNDI   |
| Q62234 | 1438 | EAFQDLMTEVCKKIALSATDL   |
| Q91YE3 | 243  | ITWIEGKEPGCETIGLLMSSM   |
| P30101 | 57   | LMLVEFFAPWCGHCKRLAPEY   |
| P14873 | 2037 | TTRSPDTSAYCYETMEKITKT   |
| P21333 | 1410 | MSCMDNKDGS CSVEYIPYEAG  |
| Q9QYJ0 | 189  | VOQM QSVCSDCN GEGEVINEK |
| Q9ET26 | 57   | HVFC SACLQECCLKPKKPVCGV |
| Q9UDY4 | 7    | XXXXMGKDYYCILGIEKGASD   |
| Q3TXS7 | 104  | SEYVETIIAKCIDHYTKQCVE   |
| Q8BZA9 | 252  | CEEARQPSIQVCMNLQEH LN   |
| O00468 | 546  | RCGQCRFGALCEAETGRCVCP   |
| P41250 | 461  | TSYGWIEIVGCADRSCYDLSC   |
| Q8TAT6 | 208  | LPWPNGICTKCQPSAITLNRQ   |
| Q9NPH0 | 416  | TL SPEKYHALCSQTQVMEVGN  |
| Q91YP0 | 38   | GPASGVPGLLCGGRRSSSTS    |
| Q6PAR5 | 176  | NPRLLRRGTCAFSILFKLFS    |
| Q6ZPY7 | 217  | YQPEGEEVWLCGVVSRQDSVT   |
| Q92616 | 1161 | MMGLDLQPDLC SLLIDDV IYH |
| Q06203 | 496  | MIQENGNGLCFEKS GHCTAC   |
| P12382 | 89   | LGGTIIIGSARCKAFTTREGRL  |
| Q6A0A9 | 529  | SHMGTVQPIPCLLSMPTRNHM   |
| Q99NB9 | 965  | ISRTAVVMKTCQEEKLMGHLG   |
| Q8VDK1 | 116  | LGQYSQLARECGIWL SLGGFH  |
| Q8R035 | 150  | SRYQFRNLAECLQKIRDMIAE   |
| Q99JY9 | 235  | KAVKERYSYVCPDLVKEFNKY   |
| P02463 | 1570 | VHSQTIQIPQCPNGWSSLWIG   |
| Q9NYY8 | 269  | QERINECDEICLSVLSTVLEA   |
| Q8BKY8 | 32   | PALKIKPSSACV TYGTDSQSD  |
| P61247 | 96   | LITEDVQGNCLTNFHGMDLT    |

---

---

|        |       |                        |
|--------|-------|------------------------|
| A2ASS6 | 15693 | ITKDAVTLTWCEPDDDDGGSPI |
| Q29RF7 | 742   | TPHQAKQAVHCHIAIFTNKEV  |
| O08749 | 306   | ASGGKAEVITCDVLLVCIGRR  |
| Q62312 | 163   | RAGETFFMCACNMEECNDYII  |
| P04117 | 2     | XXXXXXXXXXMCDAFVGTWKL  |
| Q9DCL9 | 81    | AGIKTAFTKKCGETAFAIAPQC |
| Q8BGC4 | 204   | KIAKCHVIGTCSSEDEKAAFLK |
| Q99JW4 | 74    | QMLFAPCCHQCGEFIIIGRVIK |
| Q62188 | 448   | ELRGAPLVVICQGKIMLEDGN  |
| Q8CGY6 | 786   | QLRQAATECMCNMVLNKEVQE  |
| Q91W50 | 464   | AEDGIIAYDDCGVKLTIAFQA  |
| Q9JI57 | 54    | ALSKLNTEVACVAVHNESVFFV |
| Q8TAT6 | 194   | ENISCKIKSGCEGHLPWPNGI  |
| Q92879 | 443   | FIDKQTNLSKCFGFVSYPNPV  |
| Q8C7B8 | 531   | WVGHPDPIGCLCRALLEACR   |
| P50136 | 261   | ATLECPPIIFFCRNNGYAISTP |
| P21981 | 143   | GHFILLYNACWCPADDVYLDSE |
| Q69Z37 | 570   | QVFNGMDNMLCICVNSAIYQQ  |
| Q9R1V6 | 823   | IPDTKHISDICEENGRPRSNSW |
| Q8K0S0 | 267   | LDIACNKFLTCSVEDGELIFR  |
| P47934 | 169   | PVEFLGGQPLCMNQYYQILSS  |
| P63005 | 330   | IKMWDVSTGMCLMTLVGHDNW  |
| O08749 | 312   | EVITCDVLLVCIGRRPFTQNL  |
| Q6ZPY7 | 1271  | RDFWDGFEEICKRLRSEDGQP  |
| Q99L85 | 119   | SLSWLLCHIPCVTLCQALHAL  |
| Q8R5K2 | 560   | KGDNMYSCEKCKKLRNGVKFC  |
| P99028 | 41    | VREHCEQLEKCVKARERLELC  |
| Q01320 | 169   | GGRNGYGAKLCNIFSTKFTVE  |
| O89103 | 325   | HSVPLSENYTCRCPSGYQLDS  |
| Q60870 | 114   | SWLPFYMLKCGFLLWCMAPS   |
| Q6NXE6 | 329   | LSILVSLLDACNDHQMRDQSG  |
| O95573 | 504   | TGRVGAPLVCCCEIKLKNWEEG |
| Q8R164 | 225   | QFKQLPEGNICRHLLPLVQCP  |
| Q8R2Y8 | 113   | SPQVLKEWEYCGQPKVVVKAP  |
| Q9Y272 | 171   | EQLVGDDPQRCAYFEISAKKN  |
| Q9ER72 | 608   | MEEMRALVSQCINLYMAARKAE |
| Q69Z37 | 419   | YDWYILVTNTCAPTQLEHLEF  |
| Q9ER88 | 91    | MMQVKTFGEACLMVRKPALEL  |
| O70433 | 212   | ARDEFPHYCLTFCFDLYAKKCA |
| O89103 | 408   | INTDGSFYCSCKEYIIVSGED  |
| A2ASS6 | 8370  | KATNDVGSDDTCVGSVMTKAPP |
| Q9R1V6 | 567   | GQKVTASDRYCYEKLNIEGTE  |
| P54886 | 88    | GSAVVTRGDECGLALGRLASI  |
| Q13144 | 372   | LGSQTVIGSNCFITNSVIGPG  |
| Q00987 | 461   | VHGKTGHLMACFTCAKKLKKR  |
| Q08211 | 558   | TSMFCEYFFNCPIIEVYGRTY  |
| Q99J09 | 73    | DPSAAPNEGFCSAGVQTEAGV  |
| Q15149 | 68    | RGLVRETFAWCHFVWYLTNEG  |
| Q99873 | 350   | TIDLDFKQQLCELSCSTDYRM  |
| Q922B2 | 76    | VHTSRAKKGQCFVLVLRQQQFN |
| Q9D1P4 | 24    | FDPEANSDDACTYHPGVPVFH  |
| P56399 | 195   | QLDNPARIPP CGWKCSKCDMR |

---

---

|        |       |                        |
|--------|-------|------------------------|
| Q70145 | 40    | SEVQDPHSRICFNIGCVNTIL  |
| Q92616 | 1482  | NQYVREAADDCAKAVMSNLSA  |
| P62736 | 19    | ALVCDNGSGLCKAGFAGDDAP  |
| A2ASS6 | 23887 | QSKGSDRWATCATVKVTEATI  |
| A2ASS6 | 34726 | TNSAGSVSSSCKLTIKAVKDT  |
| Q9CPR5 | 48    | RPRDRRRGRKCGRGHKGERQR  |
| P48725 | 2370  | QKELQIEASRCEALLAQEKGO  |
| Q8K3K7 | 92    | GQKKLEVDGPCVVIISNHQSIL |
| P26641 | 166   | RVTLADITVVCTLLWLYKQVL  |
| Q8VE38 | 144   | HPPAVVWHNKCTLDSEVALRV  |
| A2ASS6 | 9415  | TTKTDSGLYRCVAFNKHGEIE  |
| Q8JZN7 | 558   | HRLPAPASFSC LGPAMPSTDV |
| P36552 | 270   | GNTHWWFGGGCDLTPTYLNQE  |
| Q8R5K2 | 500   | SHPTIVKAGSCGEAYAPOGWI  |
| Q9CPY7 | 129   | ENIRAAVAAGCRQVODLELPS  |
| P26638 | 395   | GSGAFRELVCSNCTDYQARR   |
| P13707 | 162   | IASEVAEEKFCETTIGCKDPA  |
| P46459 | 582   | KMIGFSETAKCQAMKKIFDDA  |
| A8C756 | 674   | SQSPGVRQOICSLKKLFCRI   |
| Q80Y14 | 118   | VYLNGEFVGGCDILLQMHQNG  |
| Q8QZR5 | 349   | QMAKLMSVRLCPPVPGQALMG  |
| P35235 | 567   | TSGDQSPLPPCTPTPPCAEMR  |
| P50579 | 290   | VKDATNTGIKCAGIDVRLCDV  |
| Q99JW4 | 164   | YHPDHFNCANCGKELTADARE  |
| Q8NBI5 | 363   | TGSSTLAVALCSTVPSLALTS  |
| P17405 | 89    | RDVFGWGNLTCPICKGLFTAI  |
| P30101 | 85    | KGIVPLAKVDC TANTNTCNKY |
| Q8C7B8 | 248   | TAGAGTEDANCWHLDEEQIQE  |
| Q64514 | 678   | EGATWAEVTVCSSESSEVSAKF |
| O00468 | 210   | SPCPSVVAPVCGSDASTYSNE  |
| P10605 | 187   | VGCLPYTIPPC EHHVNGSRPP |
| A2ASS6 | 7684  | KCQSSFADNVCTLTLSLEPS   |
| Q61024 | 43    | RFENVNGYTNCCFGFHRLAVV  |
| Q6PGB6 | 100   | TKMLNHVLNICEKDGTFDNIY  |
| Q6P2B1 | 511   | PVLGYLMKGLCEKPLASAAAK  |
| P00750 | 179   | IRLGLGNHNYCRNPDRDSKPW  |
| Q3ULJ0 | 221   | VGAGFCDGLRCGDNTKAAVIR  |
| Q9CQ65 | 163   | IETAKKLGLRCHSKGTIVTIE  |
| P31327 | 697   | VVRHLGIVGECNIQFALHPTS  |
| Q71FD7 | 237   | QKDGRPLCEPCYQDTLEKCGK  |
| P49442 | 293   | PAAGAGYKSLCVIQGLADIYI  |
| Q8BVE3 | 235   | NCIMGVLSNKCGFQLOQYMIF  |
| P61962 | 61    | GLDEESSEFICRNTFDHPYPT  |
| Q8VCW8 | 77    | SHLVNTTVGEC LDATAQRFPD |
| P70168 | 228   | IMQVVCEATQCPDTRVRVAAL  |
| O00468 | 1624  | ECPLGREGTFCQTASGQDGS   |
| Q9QY76 | 173   | DTEVKKVMEECRRLOGEVQRL  |
| O43175 | 295   | GASTKEAQSRCGEEIAVQFVD  |
| Q9DC61 | 326   | LTHIMVGLESCSFLEDDFIPF  |
| Q811U4 | 111   | LPSGIGHTTNCFLSVEGTDGD  |
| Q9ER60 | 1183  | VNLFAGKFYYCINTTTSERFD  |
| Q69Z37 | 830   | YEKTLVIIILNCMRSQNPDESA |

---

---

|        |       |                         |
|--------|-------|-------------------------|
| Q8R016 | 78    | KSSGRCWIFSCLNVMRLPFMK   |
| Q8VBZ3 | 489   | LSWILFPLLGCVAVYSLLYLE   |
| P98156 | 140   | VSWRCDGENDCDNGEDEENC    |
| Q9QYC0 | 430   | SFASDGDSGTCSPLRHSFQKQ   |
| Q8R5K2 | 185   | CPPLTQFFLDGGLARTDKKP    |
| Q8K3K7 | 48    | LSFSAAASIVCLLRHGGRTVD   |
| Q8BKC5 | 944   | QFGGDNYRPFCTDALPLLVRV   |
| Q8K298 | 412   | IQERLFKQNTCSSTTHLAQQL   |
| Q62095 | 316   | VOQIRDLEERGCHLLVATPGRL  |
| Q922E4 | 110   | ETLDKHNCDFCVHGNDITLTV   |
| Q4G0N4 | 3     | XXXXXXXXXMTCYRGFLLGSCC  |
| Q8TEX9 | 269   | LGNAIRIRILCCLTFLVKVKS   |
| Q9ET26 | 92    | ERQIESIETSCHGCRKNFILS   |
| P30048 | 60    | QAKLFSTSSSCHAPAVTQHAP   |
| Q9NVM4 | 639   | LLEPADPEGGCCWNPHCKQAV   |
| Q61768 | 421   | GSFTDAERRKCEEELAKLYKQ   |
| Q8BVZ1 | 80    | SACRLAEHCVCSVTTCALDHA   |
| Q6ZPY7 | 715   | CINVAPHLHKCRECLERYRK    |
| P06213 | 674   | EDSELFELDYCLKGLKLPSRT   |
| A2ASS6 | 18374 | AISSSMVIKNCQRSHQGVYSL   |
| P36405 | 158   | IRDRVWQIQCSALTGEGVQD    |
| Q3UMB9 | 154   | LQELSCFVTRCYEVVMNVIHQ   |
| P23368 | 12    | LSRLRVVSTTCTLACRHLHIK   |
| P15105 | 49    | GLRCKTRTLDCEPKCVEELPE   |
| Q91W50 | 680   | ITPLRRATVECVKDQFGFINY   |
| P61922 | 166   | SQITMACGSCSNENAFKTIF    |
| Q9NPH0 | 41    | LAELQEADGQCPVDRSLLKLK   |
| Q6ZQ73 | 953   | RCESPEEGTRCVVAECIGKLV   |
| Q9EPL8 | 827   | FITQWLNDVDCFLGLHDRKMC   |
| P70398 | 540   | SAHIKILDYSCSQDRDTQKIQ   |
| P32322 | 120   | AFRPAPRVIRCMTNTPVVRE    |
| O00468 | 473   | QAPSPCLGVQCAFATCAVKN    |
| Q9WU65 | 37    | VFNSKTAELVCSHQVELTQEY   |
| P70398 | 697   | NAVYLCDREACFKWYSKLMGD   |
| P53621 | 1191  | PVEKCPLSGACYSPEFKGQIC   |
| Q14003 | 308   | FFILISITTFCLETHEGFIHI   |
| Q8CHT0 | 350   | FEYGGQKCSACSRLYVPKSLW   |
| Q9JI91 | 781   | GLMDHEDFRACLISMGYDLGE   |
| Q9JHR7 | 178   | FFLCPLLDASCKDREVNVD     |
| Q8K297 | 278   | CKQAEVQMYVCNKEVYGFVPV   |
| Q9UQM7 | 64    | HQKLEREARI CRLLKHPNIVR  |
| Q99NB1 | 445   | TWWQTETGGICIAPRPSEDGA   |
| Q14166 | 370   | PCENLLTVKDCIASIARRAGG   |
| P62932 | 88    | RHKLAKHLQVCPASVVCCSME   |
| P21266 | 190   | DEFPNLKAFMCRFEALEKIAA   |
| Q9JHU4 | 1295  | FGRLKDDREKCAKAKEALELT   |
| Q80YD1 | 549   | FAQVDGQYFVCNMDDFKFSAE   |
| Q9R0P3 | 181   | AFAPICNPVLC SWGKKA FSGY |
| Q8N0X7 | 272   | LNRPPGFLOQCDWLYPLVPDR   |
| Q7TNG8 | 106   | GTGTGVEGGVCAVQGGVCINL   |
| A2ASS6 | 15589 | FDITDVTNESCLLTWNPPRDD   |
| Q3B7Z2 | 74    | YRSKAEMRHTCRGTINLATAN   |

---



---

|        |      |                        |
|--------|------|------------------------|
| Q9P2E9 | 1057 | QAKEESEKQLCLIEAQTMEAL  |
| Q9R1V6 | 472  | AECALEGAECCKKCTLTQDSQ  |
| P48200 | 618  | SGNKNFEGRLCDCVRANYLAS  |
| P16546 | 1091 | EKRKGMLEKSCKKFMLFREAN  |
| P53621 | 254  | TCRGHYNNVSCAVFHPRQELI  |
| Q8R016 | 73   | PVTNQKSSGRCWIFSCLNVMR  |
| A8C756 | 1044 | DVTAQMVLAACWWRSMKEVALL |
| Q29RF7 | 971  | VKERRAHARQCLLKNISIRRE  |
| Q6ZQ73 | 455  | KDRNVRTROGCFNLFTELAGV  |
| O43175 | 421  | AAPGEQGFGECLLAVALAGAP  |
| P45952 | 20   | RVLRSVSHFECRTQHSKAAHK  |
| O14980 | 595  | CDTFIKIAQKCRRHVFVQVQVG |
| O08992 | 167  | DQVLQINGENCAGWSSDKAHK  |
| Q8VC74 | 302  | LLRSPGFRQLCRIPPSKSDSE  |
| Q5U458 | 241  | LTPRCFVTTNCALQFSSRGIR  |
| Q8BUV3 | 133  | TPLGMLSRPVCGIRGKTLIIN  |
| Q9R1V6 | 677  | LPVASFNFSTCSSSKAGTVCS  |
| Q8BP48 | 202  | SCCTSVNEVICHGIPDRRPLQ  |
| Q8BKT7 | 608  | IRAMESEVNVCYKELCGPRPS  |
| A8C756 | 727  | QQYKNFMSSVCNILFEALFPG  |
| Q8BUN5 | 394  | YRRQTVTSTPCWIELHLNGPL  |
| Q9CXI0 | 170  | DSLGGSLATVCDINREMLKVG  |
| P17812 | 234  | TSVKEKISMFCHVEPEQVICV  |
| P23610 | 69   | AQECLPYAAWCQLAVARCQQA  |
| P13489 | 220  | GVTSDNCRDLCGIVASKASLR  |
| Q9DB43 | 24   | LFCFEHRVNVCEHCLVANHAK  |
| Q02257 | 204  | QNTSDLDTARCTTSILHNLSH  |
| Q8CC88 | 443  | MVQSHMVKDI CLIGGKGCCKT |
| Q9CW46 | 255  | VYTPTFQCQLACGQDQGLKGFA |
| Q6R5N8 | 867  | EQGSQTTFKLCLHQDFEFGI   |
| O00468 | 183  | RGMLCGFGAVCEPNAEGPGRA  |
| Q8K298 | 1004 | SGFGAWHRRWCVLSGNCISYW  |
| P22314 | 1040 | HVRALVLELCCNDESGEDVEV  |
| Q9D051 | 161  | SAGVAAQHSQCFAAWYGHCPG  |
| P07814 | 623  | TTHALPIPVICVTYEHLITKP  |
| Q92616 | 1446 | EGALFAFEMLCTMLGKLFEPY  |
| O14744 | 278  | GTNHHSEKEFCSYLQYLEYLS  |
| A2ASS6 | 6827 | GARELVKGNRCNIYFEDTVAE  |
| Q8CGY6 | 368  | LINKLYDDLRC DPERDHFRI  |
| Q5VYK3 | 1806 | KKLEESKQWECLTSECRVLLI  |
| A2ASS6 | 4800 | ECVVANEVGKCGCVATHLLKE  |
| O89103 | 30   | GAAADSQAVVCEGTACYTAHW  |
| Q9WV34 | 232  | PHLPRQVFVKCHFDDYDPARDS |
| P06213 | 335  | NLLCTPCLGCPKVCCHLLEGE  |
| O88545 | 140  | PSDIHVHKQVCEIIESPLFLK  |
| Q9NYY8 | 265  | LRVTQERINECDEICLSVLST  |
| Q8BG51 | 335  | TFDKHDLDRDCALSPDELKDL  |
| A2ASS6 | 3592 | LASNEYGKAVCSAHLRISPRG  |
| Q8VEM8 | 272  | FVAGYIAGVFC AIVSHPADSV |
| P62192 | 399  | DLSGADIKAICTEAGLMALRE  |
| Q9R1P4 | 148  | DDMGPHIFQTCPSANYFDCRA  |
| Q9BQG0 | 890  | THHLCRARRYCHDLGERAGAL  |

---

---

|        |      |                           |
|--------|------|---------------------------|
| P17987 | 218  | SMLISGYALNCVVGSQGMPCR     |
| Q9C0B1 | 456  | QNLRREWHARCQSRIARTLPA     |
| Q3UZY0 | 1216 | ARVRALRRALCXXXXXXXXXX     |
| P16615 | 1010 | PATKSCSFSACTDGISWPFVL     |
| P17405 | 250  | GAGYWGEYSKCDLPLRTLESL     |
| O00468 | 1843 | VPREAAVCLCPGGFSGPHCE      |
| O35309 | 89   | KDGCHFNSSSCSFQVSSQILY     |
| Q62261 | 624  | AHMEFCYQELCQLAAERRARL     |
| Q64514 | 221  | DSNENGDLSKCAVLRNYKEAQ     |
| Q810L3 | 545  | PFCELNLGDKCLDGVLNNNNY     |
| Q8K298 | 258  | SSSVQOEATCCSPRDGNASVR     |
| Q8R5A6 | 365  | LRNIEADTYWCMKLLDGIQD      |
| P29474 | 368  | MSTEIGTRNLCDPHRYNILED     |
| P68104 | 31   | STTTGHLLIYKCGGIDKRTIEK    |
| Q9CQT1 | 168  | RGGKVTVLTHCNTGALATAGY     |
| P17563 | 466  | AHELRYPGGDCSSDIWIXXXX     |
| Q8K1A5 | 163  | CLCSGLGASFYMLSYLVGRP      |
| P43243 | 319  | HINGASHSRRCQLLLEIYPEW     |
| A2ASS6 | 5457 | QAKNDAGIQRC SALLSVKEPA    |
| Q9WU78 | 76   | ETLLRYDQIC SIEPKFPFSE     |
| Q8R016 | 269  | KPLFNMEDKICFVNDPRPQHK     |
| O00468 | 479  | LGVQCAFGATCAVKNQOACE      |
| Q92616 | 1692 | GAMVKMGESCFEDLLPWLME      |
| Q9DCN1 | 284  | VLAHWSRYKFCPTCGSATKIE     |
| Q3TCJ1 | 14   | SISGYTFSAVCFHSANSNADH     |
| Q3U1J4 | 1008 | FHLGEFVNVFCHGSLVMQNLG     |
| Q6PEB6 | 110  | MTATEQWIFLCAAHKTPKECP     |
| P78527 | 974  | RTFPVLLRLACDQVTRQLY       |
| O00468 | 537  | QVARKGPCDRCGQCRFGALCE     |
| Q9CRB2 | 92   | AGDTLPIEVYCHLPVLCEDQN     |
| Q4G0N4 | 311  | EKQKSSGLNLCTGTGSKAWSF     |
| P35579 | 740  | PKGFMGKQACVLMIKALELD      |
| P41091 | 434  | LGKIVLTNPVCTEVGEKIALS     |
| O43175 | 200  | QLPLEEIWPLCDFITVHTPLL     |
| Q00987 | 362  | QAEEGFDVPDC KKTIVNDSRE    |
| P35821 | 426  | ATLLATGAYLCYRVCFHXXXX     |
| Q64337 | 128  | PRNMVHPNVIDGCGNGPVVGT     |
| A2ASS6 | 5022 | SVVGGACRLDCKIAGSLPMRV     |
| Q8VBW6 | 34   | GQEALESAHVCLINATATGTE     |
| Q61792 | 32   | DKYWHKACFHCE TCKMTLNMK    |
| P01009 | 17   | WGILLLAGLCC LVPVSLAEDP    |
| P29218 | 125  | KKIEFGVVYSCVEGKMYTARK     |
| P35247 | 365  | FTNGKWNDRACGEKRLVVCEF     |
| Q62433 | 72   | YHDIGMNHKTCYNPLFNSEDM     |
| Q8C5H8 | 279  | GESLSSRMPYCWAVAVDNLRR     |
| Q99NB1 | 326  | FDYQPGDVFGCVADIGWITGH     |
| Q99NB1 | 345  | GHSYVVYGPLCNGATTVLFES     |
| Q9C0B1 | 249  | RSAVAVYSYSC EGP EEESEDD   |
| P30556 | 149  | RRTMLVAKVTC I I I WLLAGLA |
| Q9BXJ9 | 448  | DTADRFINSKCAKYMLKANLI     |
| Q14103 | 252  | KKYHNVGLSKCEIKVAMSKEQ     |
| Q8R349 | 245  | VSLAERHYNCDFKMCYKLT S     |

---

---

|        |       |                         |
|--------|-------|-------------------------|
| P80314 | 535   | PRKRVPDHHPCXXXXXXXXXX   |
| Q92769 | 417   | SIRASDKRIACDEEFSDSEDE   |
| P70310 | 322   | LPYHARRLMYCYIPDDGWTDE   |
| Q9D289 | 69    | KDELDIMKFI CKDFWTTVFKK  |
| P21981 | 285   | GQCWVFAAVACTVLRCLGIPT   |
| Q9WTI7 | 585   | CSSMNPIMAQCFDKSELSDKK   |
| P31948 | 282   | KGDYNKCRELCEKAIEVGREN   |
| Q8C460 | 116   | LLSPCGVPELCSISTRKLAH    |
| Q3UKJ7 | 416   | LPKNPEHFVVCNRSNTVVIMN   |
| Q5VYK3 | 1239  | KTLISKVCVKMCDPAKGAAGQR  |
| P48200 | 320   | VSLTLPEVVGCELTGSSNPFV   |
| Q3TL44 | 452   | TYFSEEDVRGCLEAGIKTEEE   |
| Q9WV60 | 178   | SLAYIHSFGICHRDIKPQNLL   |
| A2ASS6 | 13260 | DQAGEVLYQACNAITTAITV    |
| P37268 | 374   | STIRTQNLPCQLISRSHYSP    |
| Q9JIK5 | 517   | SGHQGRTIIFCETKKDAQELS   |
| O14980 | 164   | VGASRTSESLCQNNMVILKLL   |
| Q91YR7 | 913   | NAEPRHGELWCAVSKDITNWQ   |
| O88544 | 232   | RLEALKHALHCTILASAGQQR   |
| P08397 | 261   | RAFLRHLEGGCSVPVAVHTAM   |
| P50579 | 263   | GTHISGRIIDCAFTVTFNPKY   |
| Q8NBI5 | 47    | FKNEDYFKDLCGPDAGPIGNA   |
| P60900 | 115   | YGYEIPVDMLCKRIADISQVY   |
| Q14139 | 929   | YLNLGDEENFCATVPKGRSY    |
| P00750 | 127   | KCCEIDTRATCYEDQGISYRG   |
| P00533 | 775   | VMASVDNPHVCRLLGICLTST   |
| P97314 | 33    | VQCDGRSFHRCFCFLCMVCRKN  |
| P51787 | 214   | IVVVASMVVLCVGSKGQVFAT   |
| P98156 | 45    | SSQFQCTNGRCITLLWKCDGD   |
| P27635 | 105   | HVIRINKMLS CAGADRLQTGM  |
| Q1XH17 | 14    | APGLLRQELSCPLCLQLFDAP   |
| Q06587 | 84    | VTALRSGNKECPTCRKKLVSK   |
| Q8R1S0 | 120   | GAWDHICNMRCKAFRRMQVWD   |
| Q5SSW2 | 537   | NDLTEIEKELCSATAEFEDFV   |
| Q922B2 | 349   | FLEPTLRLEYCEALAMLREAG   |
| Q3B7Z2 | 288   | GSAGSGKDQCCSGKGDMSDED   |
| P23528 | 80    | TFVKMLPKDKCRYALYDATYE   |
| A2ASS6 | 14323 | AQLEDAGSYNCRLPSSRTDSK   |
| O00468 | 969   | LQISIQSLGPCQEAVAPSTHP   |
| Q9CR21 | 9     | XXMASRVLCAVRRLLPAAFAP   |
| O94927 | 533   | LLLQDQRSLWCWDLHMKTSL    |
| Q9D6Y9 | 81    | RGYESFGIHRCSDGGIYCKEW   |
| Q7TPD0 | 957   | LQALQHVQASCDEAHKMKFSD   |
| Q8BGX2 | 79    | YVGLLGAAACCALAPSEAAF    |
| P13707 | 265   | SCGVADLITTCYGGRRNRKVAE  |
| Q3UQ84 | 120   | YDLDRPLETDCHLRFLTFDSP   |
| O55222 | 108   | EHGNVPLHYACFWGQDQVAED   |
| P06213 | 280   | PPYYHFQDWRVCVNF SFCQDLH |
| Q8K2B3 | 467   | LLDLVVFGRACALSIAESCRP   |
| Q62407 | 94    | LLPPPAPPEPSCWLWRSCGAQD  |
| P10518 | 119   | RKTFPSLLVACDVCLCPYTSH   |
| Q8R2L5 | 38    | TQAVSVIWRRCFSQFEQVTSN   |

---

---

|        |       |                         |
|--------|-------|-------------------------|
| P10637 | 227   | AAPQAGSGSVCGETASVPGLP   |
| Q16658 | 226   | FRSGKVAFRDCEGRYLAPSGP   |
| Q91YR7 | 901   | EEQQEEVRKRCENAEPRHGEL   |
| P67775 | 55    | VQEVRCPVTVCGDVHGQFHDL   |
| Q62523 | 439   | YTDITLEKCNTCGQPITDRMLR  |
| Q9JHK4 | 256   | CCLHVSREEACL SVCFSRPLI  |
| Q9ER60 | 501   | ADGDPTHSKDCNGSLDTSGEK   |
| Q8BIJ6 | 987   | VIVVPTAREKCPRCWKHTSET   |
| Q60759 | 115   | VLGPTIKGYGCAGVSSVAYGL   |
| Q9JJX8 | 252   | VERVHYSSTWCEGMVSLKKL    |
| A2ASS6 | 20896 | NARVTKVNKDCIFVAWDRPDS   |
| P48039 | 100   | NNGWNLGYLHCQVSGFLMGLS   |
| Q5JTH9 | 630   | WQMWTLLPGFCRPTDVAISF    |
| Q8R0N6 | 144   | AVGGGSTMDTCKAANLYASSP   |
| O00468 | 687   | GEDGDCEQELCRQRGGIWDED   |
| Q3UMB9 | 1031  | TLNFVEHSISCKEKLKKNKL    |
| Q99JX3 | 192   | SAWGGEGSLCGIGYGYLHRI    |
| P62746 | 192   | RYGSQNGCINCKVLXXXXXX    |
| Q9D7B6 | 114   | SVIFEALATGCTSTTAYISIH   |
| P13439 | 222   | NGLPPPEKKACKELSFGARAE   |
| Q9WU79 | 522   | IGLHPADGQVCFGQLLGMCDQ   |
| Q64514 | 1138  | KQKSTLIDALCRKGCALADHL   |
| Q8BH86 | 529   | VSNWGGYALACALYILNSCQV   |
| P61202 | 276   | DESGSPRRTTCLKYLVLANML   |
| Q3UKJ7 | 448   | GKREGGDFVCCALSPRGEWIY   |
| Q9R1V6 | 182   | ENEKSQESSHCHSVYKSRQFE   |
| P35505 | 288   | KQDPKPLPYLCHSQPYTFDIN   |
| Q8BGY2 | 152   | SEYAVAIKPKCKXXXXXXXXXX  |
| Q7TQ48 | 863   | LSQQCSYMGGCFLEKIERAIT   |
| O15523 | 173   | DIPVEATGSNCPPIENFSDI    |
| Q7L8L6 | 191   | LLGSTSFALLCQLSVKKIQLF   |
| P49327 | 1141  | RAALQEELQLCKGLVQALQTK   |
| Q13155 | 291   | LWSVLQOIGGCSVTVPANVQR   |
| Q8CIB5 | 638   | FADEVRLSFICTEVDCKVVHE   |
| O54931 | 64    | QYLDEVLEANCCDSSVDGTYN   |
| Q14003 | 355   | EPFLTYVEGVVWVWTFEFLM    |
| P26638 | 60    | ADNLNKLKLNCSKTIGEKMKK   |
| Q4VXU2 | 508   | TPGRLLPCKCSSAAHSTYRV    |
| Q99JX4 | 207   | ASQARVDAHRCIVRALKDPNA   |
| Q61656 | 234   | TPGRLIDFLECGKTNLRRTTY   |
| Q8BP47 | 557   | VCLYPRFLQCRPXXXXXXXXXX  |
| Q8BTM8 | 1260  | EPAVDTSGVQCYGPGIEGQGV   |
| Q9WU78 | 127   | GYEKSCVLFNCAALASQIAAE   |
| Q6PDN3 | 1361  | DKPDPPAGTPCASDIRSSSLT   |
| P43897 | 64    | RRKTGYSFVNCKKALETCCGD   |
| Q6NXE6 | 5     | XXXXXXXXMSERCCSRYSSGASI |
| Q8CC88 | 1100  | EARFLSFTEECTSWKFPPLDEV  |
| P17405 | 588   | HPPSEPCGTPCRLATLCAQLS   |
| A2ASS6 | 27465 | IAGIGKCSKACEPVPARDPCD   |
| P68366 | 305   | CFEPANQMVKCDPRHGKYMAL   |
| Q9R0H0 | 396   | NAGIEECRMACGGHGYSHSSG   |
| Q99LD8 | 285   | LCLVLSTRPHXXXXXXXXXXXX  |

---

---

|        |       |                                 |
|--------|-------|---------------------------------|
| P19096 | 1010  | YDYGPQFQGI <b>C</b> EATLEGEQ GK |
| P70388 | 990   | LNGVAVQLNE <b>C</b> EKHREKINKD  |
| A2ASS6 | 5446  | IEVKHDGKYV <b>C</b> QAKNDAGIQR  |
| Q8BFZ1 | 189   | PVVHLAFFCH <b>C</b> IHYIRLLETT  |
| P17844 | 354   | TIVFVETKRR <b>C</b> DELTRKMRRD  |
| P68366 | 200   | TTHTTLEHSD <b>C</b> AFMVDNEAIY  |
| O70572 | 83    | FRSGMIGSGL <b>C</b> VFSKHP IQEI |
| P35557 | 213   | VNDTVATMIS <b>C</b> YYEDHQCEVG  |
| Q62407 | 810   | TATNELGQAT <b>C</b> ASSLAVRPGG  |
| Q01320 | 426   | FKAQIQLNKK <b>C</b> SAVKHTKIKG  |
| Q5VYK3 | 449   | ALVQQLFEAL <b>C</b> KEEPETRLAI  |
| Q86VP6 | 356   | SWKVRRAAAK <b>C</b> LDAVVSTRHE  |
| Q64511 | 375   | VKNHIWVFIN <b>C</b> L IENPTFDSQ |
| A2ASS6 | 7650  | ATLGASVVLE <b>C</b> RVSGSAPISV  |
| Q69Z37 | 1444  | RSFRRQYKHM <b>C</b> RSRQPSTLFY  |
| Q9EPL8 | 151   | NSACWLGILL <b>C</b> LYQLVKNYEY  |
| P97447 | 252   | GQSWHDYCFH <b>C</b> KKCSVNLANK  |
| Q8BVE3 | 204   | SSQYVQCVAG <b>C</b> LQLMLRVNEY  |
| Q8BP48 | 143   | SEDI EGMRLV <b>C</b> RLAREVLDIA |
| Q8VBW6 | 294   | SIEDIFNDD <b>C</b> INITKQTPTF   |
| Q9NYY3 | 665   | FRLTTLMSG <b>C</b> SSELKNRMEY   |
| P62879 | 218   | IKLWDVRDSM <b>C</b> RQTFIGHESD  |
| P53569 | 560   | RKMLDPGLT <b>C</b> SKQAMFLNLI   |
| P48200 | 467   | VTDMKSDFQ <b>C</b> ALNEKVGFKGF  |
| P06213 | 243   | LCCHSECLGN <b>C</b> SQPDDPTKCV  |
| Q5U458 | 38    | EELKAAYRRL <b>C</b> MLYHPDKHRD  |
| Q9BUJ2 | 337   | DVIGCFADFE <b>C</b> GNDVELSFTK  |
| Q9Z2Z6 | 89    | IIGVTPMFAV <b>C</b> FFGFGLGKKL  |
| O14920 | 524   | WREMEQAVEL <b>C</b> GRENEVKLLV  |
| Q8VDC0 | 278   | QAHWIGDCV <b>C</b> HLDFTLKVDG   |
| P20073 | 363   | GEGRLGTDES <b>C</b> FNMILATRSF  |
| P98156 | 303   | GSRQCNGIRD <b>C</b> VDGSDDEVNCK |
| P14618 | 31    | AMADTFLEHM <b>C</b> RLDIDSPFIT  |
| Q6ZPY7 | 835   | VRGVREMC <b>C</b> DETTLFNHVV    |
| P50247 | 228   | VAGYGDVGKG <b>C</b> AQALRGFGAR  |
| Q9NYY8 | 217   | MFSHPAFNQL <b>C</b> EHMMREAKIM  |
| O60502 | 618   | RSRAAKFEEM <b>C</b> GLVMGMFTRL  |
| A2ASS6 | 18958 | WRRANHTPES <b>C</b> PETKYKVTGL  |
| O75153 | 588   | PVPGEELPEE <b>C</b> ARAGFPRAHR  |
| Q6PDN3 | 1099  | EVKEVKNDVN <b>C</b> KKGQVGATGN  |
| O94927 | 446   | VAPQSRELLR <b>C</b> LEEEVRHLPH  |
| P30416 | 202   | VGEGESLDLP <b>C</b> GLEEAIQRME  |
| Q00987 | 308   | SLADYWKCTS <b>C</b> NEMNPPLPSH  |
| Q9BQG0 | 968   | HMPTGPQAAS <b>C</b> LDLNLVTRVY  |
| Q3ULJ0 | 331   | FPLFTAVYQI <b>C</b> YEGRPVTQML  |
| Q04206 | 95    | PHPHELVGKD <b>C</b> RDGFYEAELC  |
| P70398 | 2019  | YFQFMKLLT <b>C</b> NGVYLNPPPG   |
| Q99JW4 | 38    | GELYHEQCFV <b>C</b> AQCFQQFPEG  |
| P21817 | 4646  | STGYMEPALR <b>C</b> LSLLHTLVAF  |
| Q8K4Q0 | 86    | VKTTPCARLE <b>C</b> WIDPLSMGPQ  |
| Q6ZWY3 | 40    | SYFMDVKCPG <b>C</b> YKITTVFSHA  |
| P28663 | 241   | MFPAFTDSRE <b>C</b> KLLKLLLEAH  |

---

---

|        |       |                        |
|--------|-------|------------------------|
| Q4G0N4 | 193   | TDPERSEGHLC LPVRYTHSFP |
| Q00839 | 453   | PLFPHVLCHNC AVEFNFGQKE |
| P52825 | 324   | TLRKVDSAVFCLCLDDFFPMKD |
| Q3UMB9 | 677   | ILNEHLLDKLC KEIEKDLRLS |
| Q9CR68 | 217   | KPEWVILIGVCTHLGCVPIAN  |
| P97443 | 335   | YHEVVKLCRECLEKQEPVFAD  |
| O14980 | 859   | FLLLQAVNSHC FPAFLAIPPT |
| P42704 | 361   | EDVALQILLAC PVSKEDGPSV |
| Q8K1X1 | 999   | KRSTYDHTRKCTDQLLLLLGOT |
| Q9JLV5 | 314   | SRVPNGLKTMCECMSCYLREQ  |
| Q923E4 | 372   | SCLICKYKVDCEAVRGDIFNQ  |
| P06213 | 264   | ACRNFYLDGRCVETCPPPYH   |
| O35678 | 208   | PLVCRAGLKVCFGIQLLNAVA  |
| Q6R5N8 | 74    | PVAETYGFNKCTQYEFDIHHV  |
| Q8BUV3 | 709   | KLDRPEYHRC ILTWHHQEPL  |
| P55769 | 102   | ACGVS RPVIACSVTIKEGSOL |
| P14174 | 60    | FGGSSEPCALCSLHSIGKIGG  |
| Q06203 | 426   | RVASPPIKYPCFMGINIPTKE  |
| O70433 | 191   | WHKECFVCTACKKQLSGQRFT  |
| P18031 | 231   | RSGTFCLADTCLLLMDKRKDP  |
| Q99K43 | 72    | RERLLKSISICQKELSTLCSE  |
| O70546 | 1153  | TPGHQENNNFCSVNINIGPGD  |
| Q9QUR6 | 352   | ACVRSNFLVLCYLDHVKNILQ  |
| Q924M7 | 289   | LKGDCVECMACSDNTVRAGLT  |
| P12382 | 522   | GRYEELCIVMCVIPATISNNV  |
| P46471 | 98    | QSEQPLQVARCTKIINADSED  |
| P19367 | 834   | GVVSRRAAQLCGAGMAAVVDK  |
| Q60714 | 341   | CTVVQYIGEICRYLLRQPVRD  |
| P26639 | 237   | LAMFKYNKFKCRILNEKVNTP  |
| Q9JIK5 | 611   | GRAGRTGVCICFYQNKEEYQL  |
| Q9Z1Z0 | 779   | SGMSEQASATCPPRDPEQVAE  |
| Q8R127 | 361   | VEKNKPNIRICTQVKGPEAGY  |
| Q8BKC5 | 750   | EYLTQMWHFMDALIKAIGTE   |
| Q6R5N8 | 406   | PSLQKLNLNKCOLSFINNRTW  |
| Q9D7H3 | 153   | IAEKFGFTFNCDIKTRGYYPK  |
| Q8BK08 | 180   | NTIALAALVYCVKKVYELYAV  |
| Q7L5N1 | 283   | DKFKTDFYDQCNDVGLMAYLG  |
| O75694 | 1208  | LAECKLAIHCAGYSDPILVQ   |
| Q8BKC5 | 180   | LDVIKRMLVQCMQDQEHPSIR  |
| Q9DBF1 | 9     | XXMWRVPRRLCVQSVKTSKLS  |
| A2ASS6 | 17066 | FRVIAKNKFGCGPPVEIGPIL  |
| Q8TEX9 | 250   | TPYLSEVLTFCLEVARNVALG  |
| Q9Y3I1 | 171   | TGFYPSEPMLCSESVEGQVPH  |
| Q99832 | 370   | FFTGCPKAKCTFILRGGAEQ   |
| P23242 | 192   | SAVYTCKRDCPHQVDCFLSR   |
| P21817 | 2565  | CLAVLPLITKCAPL FAGTEHR |
| Q8VE38 | 19    | GLSRGSVGAVCTQAASWGLKA  |
| P53569 | 443   | ISPKAQYYAICFLNQMVLSHE  |
| P70398 | 577   | IPALKQIREICSLFGEAPQNL  |
| Q68FD5 | 934   | GQCDLELINV CNENSLFKSLS |
| Q9WTI7 | 441   | NSFEQFCINYCNEKLOQLFIE  |
| Q16543 | 203   | WCIDLEVEEKCALMEQVAHOT  |

---

---

|        |       |                        |
|--------|-------|------------------------|
| P39053 | 607   | YKDYRQLELACETQEEVDSWK  |
| O00468 | 578   | GSDGHTYPSECMLHVHACTHQ  |
| Q9Y277 | 229   | FGIAAKYMLDCRTSLSAKVNN  |
| A2ASS6 | 5864  | VVKDSDVELECEVMGTTPEV   |
| P21817 | 3170  | DVQVSCYRTLCSIYSLGTTKN  |
| Q9R1V6 | 431   | HDFLNSGGGACLFNKPSKLLD  |
| Q62312 | 146   | FTLEDAASPCKVMKEKKRAGE  |
| Q6PDN3 | 683   | VFPEDTGTYTCEAWNSAGEVR  |
| Q8CIB5 | 520   | DQITTDVNPECLVSPRYLKKY  |
| Q9BXJ9 | 102   | SDKKYDEAIKCYRNALKWDKD  |
| Q99NB9 | 795   | KKIVLKVVKQCCGTDGVEANY  |
| Q8VCW8 | 49    | VRALSSGMVNCNPLPIGGLS   |
| Q8BMP6 | 460   | EEEEEEENVTCCEEKAKKNANK |
| Q9CQQ7 | 16    | VLSAAATAAPCLKNAAALGPG  |
| Q8VDK1 | 255   | SQCYVIAAAQCGRHHETRASY  |
| P97443 | 332   | EGLYHEVVKLCRECLEKQEPV  |
| Q8R5G7 | 430   | EQAFSLGIGICFIELQGCSVR  |
| A2ASS6 | 14679 | IIKDCRLEDECEYACGVEDRK  |
| Q99683 | 835   | TSKRLAGINPCTETFTGTLOY  |
| Q69Z37 | 1408  | HSYPDPYFLACLLFWPENKEL  |
| O00220 | 164   | YTNASNNLFACLPCTACKSDE  |
| Q8TAT6 | 399   | NQCMALVRDECLLPCKDAPEL  |
| P45983 | 213   | KENVDLWSVGCIMGEMVCHKI  |
| P34932 | 380   | EAVTRGCALQCAILSPAFAKVR |
| P98170 | 465   | DRNIAIVFVPCGHLVTCKQCA  |
| Q9CQ48 | 99    | LTKTKRDAANCWTSLLESEYA  |
| O70433 | 275   | TERDDILCPDCGKDIXXXXXX  |
| Q9DCM0 | 139   | TRASPGHTPGCVTFVLNDQSM  |
| Q8VBW6 | 384   | SISEKELKLLCSNSAFLRVVR  |
| Q8R143 | 78    | VRKILPPASLCKLSSARWGVC  |
| Q60759 | 75    | KLIRDTFRNYCQERLMSRILL  |
| P62932 | 609   | SQVSVLMRNICATLLQERGMV  |
| P06151 | 35    | VVGVGAVGMACAISILMKDLA  |
| Q8R5K2 | 86    | LTTLRVWCYACSKEVFLDRKL  |
| Q8CG76 | 164   | STPVEETLRACHQLHQEGKFV  |
| Q92616 | 2469  | EEELSAVLQQCLLADVSGIDW  |
| Q91YE3 | 185   | IVPCMNKHGICVVDDFLGRET  |
| Q9JKS4 | 547   | RFPASSRTPLCGHCNNVIRGP  |
| O70305 | 114   | LAPAATPARACPPGVRASPPR  |
| Q9CQR2 | 17    | EFVDLYVPRKCSASNRIIAAK  |
| Q9D7B6 | 249   | QPTRAVIFEDCAVPVANRIGT  |
| P14618 | 165   | NILWLDYKNICKVVEVGSKIY  |
| A2ASS6 | 4511  | LTVQDRGIYSCKASNKFGADI  |
| P47809 | 172   | FYGALFREGDCWICMELMSTS  |
| Q9Y2Z0 | 49    | EQKPDDAQYYCQRAYCHILLG  |
| Q8K298 | 328   | SPLKTEARKPCEKPTLSQGAQ  |
| Q3UH68 | 55    | RTGLENGILLCELLNAIKPGL  |
| P50171 | 90    | ARRLLEEVQACFSRPPSVVVS  |
| Q8R3F5 | 359   | GQQLGSILKCNRQAWKSYSH   |
| A2ASS6 | 7135  | TDLSHSGQYSCSASNPLGTAS  |
| Q3TL44 | 779   | DLRDLILLHDQCQITTLRLSNN |
| A2ASS6 | 13083 | VTVENANNLECSSCVKVEII   |

---

---

|        |      |                          |
|--------|------|--------------------------|
| P27659 | 336  | VTNDFIMLKGCVVGTKKRVLT    |
| Q8CGY6 | 857  | TQWLEILQRLCLHDQLSVQHR    |
| P98156 | 239  | CGRQPVIHTKCPTSEIQCGSG    |
| Q9D7I5 | 180  | GGYMKALEYACGIKAEVVGKP    |
| Q8TAT6 | 403  | ALVRDECLLPCKDAPELGYAK    |
| Q8VDC0 | 503  | PLATALEWVNCSCPRCKGSAK    |
| Q8JZN7 | 234  | QALEDVKRVVCKNVSGGVQND    |
| O14983 | 377  | FIIDKVDGDI CLLNEFSITGS   |
| Q91YP0 | 18   | VGGVCGLARYCVAGGFLRASG    |
| Q99L47 | 16   | VSELRAFVKMCRQDPSVLHTE    |
| Q6NXE6 | 127  | FCDQCKQDKACRFLAAQKGAY    |
| Q9UBF2 | 516  | LPSILVLLQRCMMDTDDEV RD   |
| P27635 | 80   | ICANKYMVKS CGKDG FHIRVR  |
| Q8BKT7 | 147  | VMHLQKEITKCLEFKSKHEEI    |
| P21981 | 105  | QODNVLSLQLCTPANAPIGLY    |
| P00750 | 430  | AQESSVVRTVCLPPADLQLPD    |
| Q6PAR5 | 1109 | DVKKKLRLALCSADSVAF PVL   |
| Q9CR68 | 222  | ILIGVCTHLGCVPIANAGDFG    |
| P11983 | 147  | IINTDELGRDCLINA AKTSMS   |
| Q9WU65 | 293  | CFLLCNTGQKCVFSEHGLLTT    |
| Q00987 | 449  | VICQGRPKNGCIVHGKTGHLM    |
| Q62159 | 190  | QVRKNKRRRGCPILXXXXXXXX   |
| P30101 | 92   | KVDCTANTNTCNKYGVSGYPT    |
| Q62159 | 20   | IVGDGACGKTCLLIVFSKDQF    |
| Q9JIX8 | 918  | DGTHDKGLKICRTVTQVVP AE   |
| P78347 | 903  | PYRKITINPGCVVVDGMPPGV    |
| Q09666 | 567  | LGSPSGKTGT CRISMSEVDLN   |
| Q13347 | 120  | FSTDKQMGYQCFVSFFDLRDP    |
| Q8VDC0 | 505  | ATALEWVNCSCPRCKGSAKRE    |
| Q6P1X6 | 130  | ADHGPPRLSYCGGGEALAVPF    |
| Q9D6Y9 | 350  | SNIRWWLEEYCFDGF RFDGVT   |
| Q9H9A6 | 54   | SGRNLSEVPQCVWRINVDIPE    |
| Q99700 | 556  | VNGGVPWPSPCPS PSSRPPSR   |
| P53621 | 580  | VTRVKGNNVYCLDRECRPRVL    |
| P05063 | 73   | LFSADDRVKKCIGGVIFFHET    |
| P23975 | 131  | REGAATVWKICPFFKGVGYAV    |
| P70695 | 117  | AQERRGKYVVCFDPLDGSSNI    |
| P02730 | 479  | LVFEEAFFSF CETNGLEYIVG   |
| P98156 | 278  | SDEVNCP SRTC RP DQFECEDG |
| P98156 | 290  | PDQFECEDGSCIHGSRQCNGI    |
| O70370 | 147  | EVKYQGSCGACWAFSAVGALE    |
| Q64514 | 28   | KKETGASSFLCRYPEYDGRGV    |
| P48507 | 114  | SSTRSAVDMACSVLGVAQLDS    |
| A2ASS6 | 4416 | TQVVDCGEYTC KASNEYGSVS   |
| P35282 | 124  | ELRKMLGNEICLCIVGNKIDL    |
| Q8C7B8 | 463  | IWLGEPPPTACARVDTLRAHG    |
| P07742 | 444  | EYTSKDEVAVCNL ASLALNMY   |
| Q09161 | 616  | DKMIRTQIVDCAAVANWIFSS    |
| P15170 | 407  | IVIIEHKSIICPGYNAVLHIH    |
| P41216 | 168  | RPEWVIVEQGCFSYSMVV VPL   |
| Q16555 | 248  | RAITIANQTNCP LYITKVMSK   |
| P30044 | 7    | XXXXMGLAGVCALRRSAGYIL    |

---



---

|        |      |                         |
|--------|------|-------------------------|
| Q8BH61 | 410  | PQENSDGMYRCGPASVQAVKH   |
| Q00987 | 438  | SSLPLNAIEPCVICQGRPKNG   |
| P53621 | 127  | IRVWNWQSRTCVCVLTGHNHY   |
| Q3U5Q7 | 76   | LGPPGRSYALCVPLAPGEGCG   |
| Q8BRK8 | 200  | YAGPEVDIWSCGVILYALLCG   |
| P55072 | 184  | CIVAPDTVIHCEGEPIKREDE   |
| P04083 | 263  | DLELKGDIIEKCLTAIVKCATS  |
| P35557 | 364  | TLGLRPSTTD CDIVRRACESV  |
| Q8K2M0 | 252  | SNRVAEQETCPYLPPFPARG    |
| Q9Y277 | 122  | GKLGASYKRDCF SVGSNVDID  |
| Q9DBB8 | 86   | HPQHKPAVLLCLAAGKAVLCE   |
| Q9Z1Z0 | 232  | NSDGGIVVEDCLILLQNLKKT   |
| Q9DBF1 | 330  | FAAVGTAGQRC TTVRRLFLHE  |
| Q7TPV4 | 683  | GHICPHLTPRCLQLILAVLSP   |
| Q921S7 | 188  | PLIVDSL IQLCKSQILKHPSL  |
| Q8K0S0 | 227  | STNLYFADFYCMYTAYHYAIL   |
| P98192 | 583  | KPFVESYQLLCRYLLHEEDYF   |
| Q8C7B8 | 338  | LWDELGALWVCVILSPHCKPD   |
| Q9CZC8 | 188  | ERITEGVRCI CNHLSLATKLD  |
| Q9WVQ5 | 212  | TWEKAKTMCECYDYLF DIAVS  |
| Q9JHR7 | 573  | QDDKFFLPKACLNF EFFSPFA  |
| P21817 | 3733 | MAYADIMAKSCHLEEGGENGE   |
| Q14315 | 665  | IAHILPAPPDCFPDKVKAFGP   |
| Q8BP48 | 194  | LNYYNFPKSCCTSVNEVICHG   |
| Q9JLJ2 | 173  | ACWKSAPALACGNAMIFKPSF   |
| Q9BY44 | 42   | PRESGKNCKVCIFSKDGT LFA  |
| Q13347 | 99   | LLKTNSAVRTC GFDFGGNIIM  |
| A2ASS6 | 6988 | ASVGDSVSLQCQVAGTPEITV   |
| O89103 | 428  | DSTQCED IDECS DARGNPCDS |
| Q6ZPY7 | 854  | WVCRKCGFGVCLDCYRLRKS    |
| P21817 | 1268 | RVDGTVDTPPCLRLTHRTWGS   |
| Q9WU78 | 231  | ADYFGDAFKQCQYKDTLPKEV   |
| Q16543 | 57   | KEELDRGCRECKRKVAECQRK   |
| P21817 | 1723 | LLISIHLESACRSRRSMLSEY   |
| P97494 | 257  | NCCLQVTFQACSISEARYLYD   |
| P28663 | 164  | GEESNSSANKCLLKVAAYAAQ   |
| O75369 | 1375 | VEGPSESKINCRDNKDGSCSA   |
| Q99KC8 | 464  | ALGSLKFALQCAVDNISLSWD   |
| P23975 | 240  | IGLPQWQLLLCLMVVIVLYF    |
| P00558 | 316  | GIPAGWMGLDCGPESK KYAE   |
| O89103 | 449  | LCFNTDGSFRCGCPPGWELAP   |
| Q60932 | 2    | XXXXXXXXXXMCSFFLVLLLWQ  |
| P13804 | 159  | YAGNALCTVKCDEKVKVFSVR   |
| Q15149 | 4574 | DVGAYSKYLTCPKTKLKISYK   |
| Q64436 | 822  | GCITILFIELCTDIFPSVSLA   |
| Q60597 | 825  | ENFDINQLYDCNWIVVNCSTP   |
| Q3UK37 | 76   | WTDLAPEAQACVVKSALGSQG   |
| P54819 | 232  | SILAAFSKATCKDLVMF IXXX  |
| Q8BHP7 | 52   | QVRMTSEGSDCRCKCIMRPLS   |
| P28474 | 195  | NTAKVEPGSTCAVFGLGGVGL   |
| Q9R1V6 | 492  | QCS DGLCCKKCKFQPLGTVCR  |
| Q64277 | 273  | MCVDHSTHPDCIMNSASASMR   |

---

---

|        |       |                                                                                                                                         |
|--------|-------|-----------------------------------------------------------------------------------------------------------------------------------------|
| Q60749 | 238   | HVFIEVFGPP <b>C</b> EAYALMAHAM                                                                                                          |
| P22315 | 233   | RWPTHPLLIQ <b>C</b> FADHILKELN                                                                                                          |
| Q8BG05 | 94    | SCVEEVDAAM <b>C</b> ARPHKVDGRV                                                                                                          |
| A2A432 | 156   | DSASPSTSSF <b>C</b> LGVPVATSSH                                                                                                          |
| P21817 | 1216  | DVSSLRFFAI <b>C</b> GLQEGFEPFA                                                                                                          |
| Q8BH59 | 130   | IHHHIPFNWD <b>C</b> E F I R L H F G H N                                                                                                 |
| Q9EPB5 | 113   | FGGCVGGTF <b>C</b> MFPEMVDKLI                                                                                                           |
| Q99K01 | 202   | NQLGLPFP <b>C</b> L <b>C</b> RVPCNTMFGS                                                                                                 |
| Q60605 | 2     | XXXXXXXXXX <b>M</b> CDFTEDQ <b>T</b> A <b>E</b> F                                                                                       |
| Q8CG76 | 190   | NYASWEVAE <b>I</b> <b>C</b> TLCKSNGWIL                                                                                                  |
| P98156 | 734   | QINDHSPKY <b>T</b> <b>C</b> SCPNGYNLEE                                                                                                  |
| Q6PDN3 | 1203  | VAKNSAGQAE <b>C</b> SCQVTVDDAQ                                                                                                          |
| Q13868 | 191   | RQKTHFHDL <b>P</b> <b>C</b> GASVILGNNG                                                                                                  |
| P40227 | 499   | AAEVGVWDNY <b>C</b> VKKQLLH <b>S</b> C <b>T</b>                                                                                         |
| Q92769 | 312   | GGYTIRNVAR <b>C</b> WTYETAVALD                                                                                                          |
| P07744 | 490   | GSGLGLSG <b>F</b> <b>C</b> SGSGSGSG <b>F</b> <b>G</b>                                                                                   |
| P07356 | 223   | WISIMTERSV <b>C</b> H <b>L</b> QKV <b>F</b> ERYK                                                                                        |
| Q8R5G7 | 225   | ASDRRDGRGV <b>C</b> Q <b>E</b> RAEHR <b>Q</b> DL                                                                                        |
| Q8NBI5 | 480   | FFHPFLVYRE <b>C</b> RTWKES <b>P</b> SAI                                                                                                 |
| Q9DAW6 | 430   | HIATGSGDNT <b>C</b> KVWDLR <b>Q</b> RRC                                                                                                 |
| Q9BXP5 | 421   | ECKPRPLH <b>K</b> <b>T</b> <b>C</b> SLFMRNI <b>A</b> PN                                                                                 |
| P53996 | 123   | DHADEQKC <b>Y</b> <b>S</b> <b>C</b> GEFGHI <b>Q</b> KDC                                                                                 |
| P63318 | 85    | RRCHEFVTF <b>E</b> <b>C</b> PGAGKGP <b>Q</b> TD                                                                                         |
| Q14690 | 361   | QPGRPLTRL <b>S</b> <b>C</b> QNLGAVLDDV                                                                                                  |
| P31327 | 1256  | VKGNVLLV <b>I</b> <b>E</b> <b>C</b> NLRASRS <b>F</b> PF                                                                                 |
| O35643 | 391   | AIKVEQSAER <b>C</b> VSTLLD <b>L</b> I <b>Q</b> T                                                                                        |
| A2ASS6 | 30687 | VKENKV <b>P</b> <b>C</b> <b>L</b> E <b>C</b> NYKVTGL <b>V</b> EG                                                                        |
| Q6IFX4 | 333   | AQHRMRES <b>Q</b> <b>E</b> <b>C</b> ILTETE <b>A</b> RYT                                                                                 |
| Q91ZA3 | 286   | GNALWLN <b>E</b> <b>R</b> <b>E</b> <b>C</b> SIQRN <b>Q</b> KVV                                                                          |
| A2ASS6 | 24000 | NNSLLTI <b>K</b> <b>E</b> <b>A</b> <b>C</b> REDVGHY <b>T</b> V <b>K</b>                                                                 |
| P61620 | 148   | GDPSEMGAGI <b>C</b> LLIT <b>I</b> QL <b>F</b> VA                                                                                        |
| P70398 | 1323  | QTFIIDLL <b>L</b> <b>H</b> <b>C</b> HSKTVR <b>Q</b> VAQ                                                                                 |
| Q99683 | 666   | EKGRSTEEGD <b>C</b> ESDLLE <b>Y</b> D <b>Y</b> E                                                                                        |
| P63318 | 114   | RLHSYSS <b>P</b> <b>T</b> <b>F</b> <b>C</b> DHCGSL <b>L</b> Y <b>G</b> L                                                                |
| Q921G7 | 585   | GFRLQINA <b>Q</b> <b>N</b> <b>C</b> VHCK <b>T</b> CD <b>I</b> KD                                                                        |
| P16546 | 158   | AQKLVQYL <b>R</b> <b>E</b> <b>C</b> EDVMDW <b>I</b> NDK                                                                                 |
| P54729 | 51    | LAKKYSER <b>L</b> <b>E</b> <b>C</b> CENEVEN <b>I</b> IE                                                                                 |
| Q9EPL8 | 113   | PELIRVQL <b>T</b> <b>C</b> IIH <b>I</b> IKHD <b>Y</b> P                                                                                 |
| O00468 | 502   | QACSSLYDP <b>V</b> <b>C</b> GS <b>D</b> GV <b>T</b> Y <b>G</b> SA                                                                       |
| Q5SFM8 | 21    | SWLAKLLE <b>P</b> <b>I</b> <b>C</b> DAD <b>P</b> SAL <b>A</b> NY                                                                        |
| Q9BSK1 | 163   | AGGKPHE <b>C</b> SV <b>C</b> GRA <b>F</b> SR <b>K</b> A <b>Q</b> L                                                                      |
| Q5SSW2 | 631   | RVAGRMV <b>A</b> <b>D</b> <b>M</b> <b>C</b> RAAVK <b>C</b> CE <b>E</b>                                                                  |
| P01111 | 80    | QYMRTGEG <b>F</b> <b>L</b> <b>C</b> VFAIN <b>N</b> SK <b>S</b> F                                                                        |
| Q61733 | 21    | PRPFSGL <b>P</b> <b>L</b> <b>S</b> <b>C</b> GNRDV <b>S</b> V <b>A</b> VL                                                                |
| Q3UH68 | 182   | RSIRDSGY <b>I</b> <b>D</b> <b>C</b> WDSER <b>S</b> DSL <b>S</b>                                                                         |
| P35557 | 220   | MISCY <b>Y</b> ED <b>H</b> <b>Q</b> <b>C</b> EVGM <b>I</b> VG <b>T</b> GC                                                               |
| Q9WU65 | 234   | EIPMSIL <b>P</b> <b>N</b> <b>V</b> <b>C</b> SSSE <b>I</b> Y <b>G</b> L <b>M</b> T                                                       |
| Q9WTP6 | 92    | LIEKNLE <b>T</b> <b>P</b> <b>S</b> <b>C</b> KNG <b>F</b> LL <b>D</b> GF <b>P</b>                                                        |
| P16546 | 1454  | CLELQ <b>L</b> <b>F</b> <b>H</b> <b>R</b> <b>D</b> <b>C</b> EQAEN <b>W</b> MA <b>A</b> R                                                |
| Q00610 | 1565  | QWFLO <b>E</b> <b>E</b> <b>K</b> <b>R</b> <b>E</b> <b>C</b> FG <b>A</b> CL <b>F</b> T <b>C</b> Y <b>D</b>                               |
| Q9ER72 | 418   | ASKPG <b>E</b> <b>P</b> <b>S</b> <b>W</b> <b>P</b> <b>C</b> PWG <b>K</b> GR <b>P</b> GW <b>H</b>                                        |
| Q71FD7 | 245   | EPCY <b>Q</b> <b>D</b> <b>T</b> <b>L</b> <b>E</b> <b>K</b> <b>C</b> G <b>K</b> <b>C</b> GE <b>V</b> <b>V</b> <b>Q</b> <b>E</b> <b>H</b> |

---

---

|        |       |             |              |
|--------|-------|-------------|--------------|
| Q810L3 | 61    | PSNKLVSGDHC | KLTVDEISGE   |
| Q6A0A9 | 14    | QGFQDYIEKH  | CPSAVVPVELQ  |
| Q60714 | 326   | KFSASRFWDD  | CVKYNCTVVQY  |
| Q9JLJ2 | 381   | YYMTPCILTN  | CRDDMTCVKEE  |
| Q8C0M9 | 179   | KLEKGAQNAD  | CPKNSGTVGAV  |
| Q8K4Q0 | 594   | IWQNFDSARW  | CGVRDSAHEKL  |
| Q9ET26 | 33    | DPLSRFTCPV  | CLEVFEEKPVQV |
| Q99KN2 | 97    | IWKKNQDDFE  | CVTTLEGHENE  |
| P62932 | 95    | LQVCPASVVC  | CSMEWIRWPNV  |
| O00468 | 1105  | TPGPPVERAS  | CYNALGCCSD   |
| Q8VBZ3 | 145   | DWTSGENSDG  | CYEHFAELDIP  |
| Q69Z37 | 755   | VLWDLKQKFR  | CAVLKNKATDF  |
| P20073 | 285   | TQERVLIEIL  | CTR TNQEIREI |
| P54071 | 12    | AGYLRAVSSL  | CRASGSARTWA  |
| Q6PDN3 | 571   | ALPEDRGTYT  | CLAENAMGOVS  |
| O88712 | 118   | KSAGDLGIAV  | CNVPAASVEET  |
| P53569 | 472   | ITLYFCFFRT  | CIKKKDIESKM  |
| P26039 | 1978  | LQAGNRGTQA  | CITAASAVSGI  |
| Q8VDK1 | 288   | VARCSEGPGL  | CLARIDLHFLO  |
| O08739 | 273   | LITDGPTKTY  | CHRRLNFLSK   |
| P21817 | 4113  | SGPEIQFLLS  | CSEADENEMIN  |
| Q9H4A6 | 84    | REGYTSFWND  | CISSGLRGCML  |
| Q9ER60 | 182   | SLIKMLARGF  | CIDDFTFLRDP  |
| P78527 | 1399  | VQVMAHLPDV  | CVNLMKALKMS  |
| Q8VCI5 | 128   | DASSQQEFTS  | CLKETLSGLAK  |
| Q99KB8 | 9     | XXMVLGRGSL  | CLRSLSALGAT  |
| Q8BP47 | 353   | LAEFTHVEAE  | CPFLTFEDLLN  |
| Q8K298 | 975   | LEGHICLKIS  | CQVNSAVEEKG  |
| A2ASS6 | 32738 | VRYQSNATLV  | CKVTGHPKPIV  |
| P78527 | 285   | FALHASQFST  | CLLDNYVSLFE  |
| Q9NP79 | 38    | DKRDPVVAYY  | CRLYAMQTGMK  |
| Q6IFX4 | 54    | CALQTPQGQG  | CGSSPCLYRCP  |
| Q9D6Y7 | 218   | QYLSKNPDGY  | CGLGGTGVSCP  |
| Q99683 | 185   | FSMANNIILY  | CDTNSDSLQSL  |
| P98156 | 367   | INECLVNNGG  | CSHICKDLVIG  |
| P51787 | 136   | HFAVFLIVLV  | CLIFSVLSTIE  |
| Q05586 | 932   | IEREEGQLQL  | CSRHRESXXXX  |
| O00468 | 602   | HVASAGPCET  | CGDAVCAFGAV  |
| P12004 | 62    | LRSEGFDTYR  | CDRNLAMGVNL  |
| Q61768 | 330   | QRAKTIKNTV  | CVNVELTAEQW  |
| P53569 | 603   | VTCTQMPPI   | CGALYLVSEIL  |
| A6H611 | 140   | PAFREAAQEA  | CRSIGTMVEKL  |
| Q9Z2I8 | 370   | LVNIFGGIVN  | CAIIANGITKA  |
| Q8BGD5 | 609   | ETVRSCTREA  | CQFVRAMDNKE  |
| P49368 | 279   | QMEEYIQQL   | CEDI IQLKPDV |
| A2ASS6 | 3709  | KAQNLWGEST  | CAAELLVLPED  |
| A2ASS6 | 31871 | QKVDQREWTK  | CNTPPTKIREY  |
| P70398 | 819   | VVIHEDFIQS  | CFDRLKASYDT  |
| P60981 | 12    | ASGVQVADEV  | CRIFYDMKVRK  |
| Q8BK64 | 207   | AKPVGVKIPT  | CKITLKETFLT  |
| P28271 | 370   | ELDLKTVVPC  | CSGPKRPQDKV  |
| A2ASS6 | 5926  | IIANEGGSCA  | CSARVALKEPP  |

---

---

|        |       |                                                                                                                |
|--------|-------|----------------------------------------------------------------------------------------------------------------|
| P53041 | 343   | EVFEWLPLAQ <b>C</b> INGKVLIMHG                                                                                 |
| A2ASS6 | 26786 | PSEPSVIFYRAC <b>D</b> ALYPPGPPS                                                                                |
| Q8BFR6 | 217   | NKLTAKKLRL <b>C</b> HVPSGEALPL                                                                                 |
| A2ASS6 | 5271  | EAQNEAGSDH <b>C</b> TGIVIVKESP                                                                                 |
| Q8BFR6 | 98    | LRHRHQSDHD <b>C</b> EKLEVAKPRM                                                                                 |
| P28271 | 392   | VSEMKKDFES <b>C</b> LGAKQGFKGF                                                                                 |
| P98156 | 200   | PPTCGAHEF <b>Q</b> CSTSSCIPLSW                                                                                 |
| Q9Z1Z2 | 270   | SYKGFHGP <b>I</b> H <b>C</b> VRFSPDGELY                                                                        |
| O89103 | 436   | DECSDARGNP <b>C</b> D <b>S</b> LCFNTDGS                                                                        |
| Q9WUM3 | 79    | GRIDKAYPTV <b>C</b> GHTGPVLDID                                                                                 |
| Q9D710 | 59    | LPT <b>Q</b> REDGNP <b>C</b> DFDWREVEIL                                                                        |
| O94760 | 275   | LEKVDGLL <b>T</b> C <b>S</b> VLINKKVDS                                                                         |
| Q8CG76 | 193   | SWEVAEICTL <b>C</b> KSNGWILPTV                                                                                 |
| P10242 | 347   | RPHGDSAPV <b>S</b> CLGEHHSTPSL                                                                                 |
| P14866 | 521   | EVTEENFFE <b>I</b> C <b>D</b> ELGVKRPSS                                                                        |
| Q9CQS4 | 326   | ELIANFAASL <b>C</b> SDVILYPLET                                                                                 |
| O94927 | 192   | PVVLRDVRTA <b>C</b> TLRAQFLQNL                                                                                 |
| P21817 | 2310  | SYLAGCGL <b>Q</b> S <b>C</b> PMLVAKGYPD                                                                        |
| P99029 | 11    | MLQLGLRVL <b>G</b> CKASSVLRAS <b>T</b>                                                                         |
| Q92600 | 252   | NPRAREAL <b>R</b> Q <b>C</b> LPDQLKDTTF                                                                        |
| Q8N0X7 | 123   | LYPEFP <b>P</b> KDM <b>C</b> EKLPEPQSF <b>S</b>                                                                |
| Q61792 | 5     | XXXXXXXX <b>M</b> PN <b>C</b> ARCGKIVYPT                                                                       |
| Q99798 | 332   | FKDHLVPDP <b>G</b> CHYDQLIEINL                                                                                 |
| Q9CXJ4 | 347   | ERYQAELE <b>S</b> CC <b>C</b> KAEE <b>L</b> GRGI                                                               |
| Q91YE3 | 33    | LCG <b>K</b> MENLL <b>R</b> CGRCR <b>S</b> SFYCC                                                               |
| Q5VYK3 | 1347  | SS <b>P</b> MMETIN <b>M</b> CLQYLDVSV <b>L</b> G                                                               |
| Q71FD7 | 274   | F <b>H</b> PPC <b>F</b> TCV <b>T</b> CA <b>R</b> CISDES <b>F</b> A                                             |
| Q99L13 | 198   | LE <b>C</b> MGSNVV <b>Y</b> CGAVGTGQ <b>S</b> AK                                                               |
| Q5UIP0 | 2223  | AGL <b>A</b> DDIDRR <b>C</b> SIVRSH <b>S</b> SNS                                                               |
| Q99K43 | 14    | SEVL <b>A</b> DESIT <b>C</b> LQK <b>A</b> L <b>T</b> HLRE                                                      |
| P42704 | 413   | HS <b>F</b> PLQ <b>F</b> TL <b>H</b> CALLANK <b>T</b> DLA                                                      |
| Q8BG51 | 229   | DAEL <b>N</b> FF <b>Q</b> RI <b>C</b> FNTPLAP <b>Q</b> AL                                                      |
| Q9BQ04 | 107   | K <b>F</b> EEYGPV <b>I</b> E <b>C</b> DIVKDYAF <b>V</b> H                                                      |
| Q99JX3 | 173   | LYVYNTD <b>T</b> DN <b>C</b> REV <b>I</b> ITP <b>N</b> SA                                                      |
| Q8WX93 | 703   | PP <b>P</b> AF <b>P</b> ELAA <b>C</b> TP <b>P</b> AS <b>P</b> EP <b>M</b> S                                    |
| Q8BKY8 | 15    | L <b>P</b> T <b>G</b> H <b>Q</b> LC <b>R</b> L <b>C</b> LL <b>R</b> K <b>P</b> RP <b>A</b> LK                  |
| Q9ES28 | 315   | Q <b>Q</b> VL <b>V</b> Q <b>S</b> LE <b>E</b> C <b>T</b> KS <b>P</b> EA <b>Q</b> Q <b>R</b> V                  |
| Q60770 | 402   | P <b>V</b> LL <b>N</b> K <b>N</b> HD <b>N</b> CD <b>K</b> IRAV <b>L</b> LY <b>I</b>                            |
| Q921M4 | 762   | RV <b>Q</b> L <b>K</b> E <b>Q</b> K <b>A</b> R <b>C</b> RS <b>L</b> SH <b>L</b> A <b>P</b> V                   |
| A6H611 | 560   | PL <b>P</b> K <b>A</b> M <b>V</b> S <b>R</b> L <b>C</b> ES <b>K</b> K <b>V</b> CT <b>A</b> AE                  |
| Q91WD7 | 153   | C <b>I</b> DE <b>I</b> K <b>E</b> E <b>K</b> E <b>C</b> ST <b>A</b> VS <b>Y</b> LE <b>V</b> Y                  |
| O70325 | 102   | EC <b>G</b> LR <b>I</b> L <b>A</b> FP <b>C</b> N <b>Q</b> FGR <b>Q</b> EP <b>G</b> S                           |
| P60709 | 374   | ES <b>G</b> PS <b>I</b> V <b>H</b> R <b>K</b> CFXXXXXXXX                                                       |
| Q8BY71 | 117   | K <b>I</b> R <b>Q</b> I <b>I</b> PP <b>G</b> FT <b>N</b> T <b>N</b> DF <b>L</b> SL <b>L</b>                    |
| Q8R5G7 | 502   | SN <b>P</b> AN <b>R</b> H <b>C</b> AD <b>C</b> RAS <b>R</b> PD <b>W</b> AA <b>V</b>                            |
| Q62407 | 1469  | V <b>S</b> RR <b>D</b> L <b>G</b> PL <b>T</b> CS <b>A</b> R <b>N</b> R <b>H</b> GT <b>K</b> A                  |
| P62911 | 91    | N <b>V</b> KE <b>L</b> EV <b>L</b> LM <b>C</b> N <b>K</b> SY <b>C</b> AE <b>I</b> A <b>H</b>                   |
| P48643 | 302   | I <b>K</b> ET <b>G</b> AN <b>L</b> A <b>I</b> C <b>Q</b> W <b>G</b> FD <b>D</b> E <b>A</b> N <b>H</b>          |
| Q91ZA3 | 72    | I <b>L</b> IAN <b>R</b> GE <b>I</b> A <b>C</b> R <b>V</b> IK <b>T</b> CK <b>K</b> M <b>G</b>                   |
| Q9EPL8 | 722   | TK <b>Y</b> LE <b>M</b> I <b>Y</b> SM <b>C</b> KK <b>V</b> L <b>T</b> GV <b>A</b> GE                           |
| Q9WV35 | 174   | A <b>A</b> L <b>K</b> KL <b>K</b> E <b>A</b> G <b>C</b> KL <b>R</b> IM <b>K</b> P <b>Q</b> DF                  |
| Q8BGQ7 | 184   | N <b>F</b> W <b>E</b> M <b>G</b> DT <b>G</b> P <b>C</b> G <b>P</b> C <b>S</b> E <b>I</b> H <b>Y</b> D <b>R</b> |

---

---

|        |       |                         |
|--------|-------|-------------------------|
| Q8VBT1 | 585   | CEATPAPTASCTPAEAELOSQ   |
| Q9JIK5 | 363   | SDITKKLSVACFYGGTPYGGQ   |
| A2ASS6 | 16272 | NVKVIGLPGPCCKDIKASDITK  |
| Q99JB8 | 42    | GHRLCGDLVSCFQERARIEKA   |
| Q5UIP0 | 766   | IIYIITVMVDCIDFSPYNIKY   |
| A2ASS6 | 32552 | SWITNYVVEKCEAKEGAEWQL   |
| P30046 | 57    | AMALSGSTEPCAQLSISSIGV   |
| P26639 | 206   | SNDFSSLEALCKKIIEKQAF    |
| A2ASS6 | 2294  | VPESYSGELECIISPENIEGK   |
| P37268 | 258   | KPENIDLAVQCLNELITNALH   |
| P41216 | 487   | TAGHVGAPMPCNYVKLVDVEE   |
| Q5UIP0 | 917   | ELLEQLSPLLCIIFLHKNKQI   |
| P35821 | 339   | SSHQWVSEETCGDEDLAREE    |
| P19096 | 879   | ESPDHYLVDHCIDGRVIFPGT   |
| Q9CR24 | 39    | PAAA AVL VPLCLVRGVPALLY |
| Q3ULD5 | 13    | GALRSALRPC CRAAVPPQRAY  |
| P31948 | 420   | FQLALKDCEECIQLEPTFIKG   |
| Q08J23 | 267   | KEILFYDRILCDVPCSGDGM    |
| Q3U1J4 | 18    | TAQKPTAVNGCVTGHFTSAED   |
| Q64337 | 219   | RPPRAGDGRP CPTAESASAPP  |
| Q9NX47 | 17    | QOMLDRSCWVCFATDEDDRTA   |
| Q99832 | 158   | KVEQRKLLLEKCAMTALSSKLI  |
| Q91WD5 | 9     | XXMAALRALRCLRGV GAVLR   |
| Q60973 | 277   | LVDAHTAEVNCLSFNPYSEFI   |
| P14780 | 347   | VMGGNSAGELCVFPFTFLGKE   |
| Q14166 | 254   | YGETDPLIRKCM LLPWAPTDM  |
| Q99832 | 29    | IPQLVSNISACQVIAEAVRTT   |
| Q6ZPY7 | 800   | YILANVGDQFCQLVMSEKEAM   |
| P19367 | 886   | HQTVKELSPKCNVSFLLSEDG   |
| P21817 | 3216  | LEPQLNEYNACSVYTTKSPRE   |
| Q9NYY3 | 482   | ADTVARVLRGCLENMPEADCI   |
| P06213 | 223   | SHCQKVCPTICKSHGCTAEGL   |
| Q8R5G7 | 1251  | QERFFLVRGRCLLLLKEKKSS   |
| Q8CGY6 | 487   | KIKIRTLVGLCKLGSAGGSDY   |
| P26039 | 1353  | TDSINQLITMCTQQAPGQKEC   |
| Q8BVF2 | 155   | VKFIKAISTTCIPNYPDRNLP   |
| Q9C0B1 | 338   | TGTLDYILQRCQLALQNV CDD  |
| Q9ET26 | 174   | THSTDTKSVVCPICASMPWGD   |
| Q3LXA3 | 24    | ADDALAGLVACNPNLQLLQGH   |
| Q9WUB4 | 128   | ILTSGCIIGACCSLNTFEAIP   |
| P61080 | 107   | LTVSKVLLSICSLLCDPNPDD   |
| Q8BMF3 | 19    | ARLTSVPRIACSSLRRQAPSA   |
| Q8K0G5 | 251   | QYYLASCDDCKVKFWDTRNV    |
| P19367 | 133   | GSQLFDHVAECLGDFMEKRKI   |
| O70546 | 1334  | KEEPAHYCSICEVEVFDLLFV   |
| P56399 | 727   | SAAADPPPEDCVTTIVSMGFS   |
| Q91V76 | 226   | AHIMPAEFSSCPLNSDEAVNK   |
| P40936 | 116   | YDWSSIVQHACELEGDRSRWQ   |
| Q60714 | 103   | LALVDASSGICWTF AQLDTYS  |
| Q64514 | 372   | NNGPCLSTVGC PGGTTSSVIG  |
| P53621 | 140   | VLTGHNHYVMCAQFHPTEDLV   |
| O43447 | 122   | MANSGPSTNGCQFFITCSKCD   |

---

---

|        |       |                         |
|--------|-------|-------------------------|
| Q8K4Q0 | 1270  | DIHPQANLIACGSMNQFTAIY   |
| Q08211 | 1004  | LLAFGVYPNVCYHKEKRKILT   |
| P53041 | 11    | MAMAEGERTECAEPPRDEPPA   |
| Q91WU5 | 369   | PRHAPEGTGGCCGKRKNCXXX   |
| Q6PEB6 | 92    | NGLAVKLQSECHPDTCTQMTA   |
| Q99KP6 | 298   | IRIWSVPNTSCVQVVRAHESA   |
| O89103 | 314   | SSNPCTGGGMCHSVPLSENYT   |
| Q99L13 | 74    | LILYDVFPDVCKEFKEAGEQV   |
| Q9DBB5 | 85    | IPPVTSPLPLRCSYHLMRGERR  |
| P78527 | 2403  | LKTLCLEVVLCRVEGMTELYF   |
| Q15527 | 83    | PSTKNPHQLFCKLTLRHINKC   |
| P78527 | 373   | IRGYGLFAGPCKVINAKDVDF   |
| P00533 | 207   | GSCWGAGEENCQKLTKIICAQ   |
| A2ASS6 | 5353  | FVAADAGEYQCRVTNEVGSST   |
| Q91VI7 | 243   | KLGNAGIAALCPGLLLPSCKL   |
| Q9JIX8 | 676   | TSYTETKDPSCGQEAAPSGP    |
| Q9Z2W0 | 267   | FAPRLDNLHSCFCALQALIDS   |
| P17812 | 299   | ADRYDRLLETCSIALVGKYTK   |
| A2ASS6 | 3670  | KEDMPLYTSVCYTI IHSPDGS  |
| Q8BMF4 | 33    | AALKEGPGAPCGSPRIGPAAV   |
| P62820 | 26    | LIGDSGVGKSCLLLRFADDTY   |
| A2ASS6 | 6609  | GSMTVTVGETCALECKVAGTP   |
| Q91WU5 | 157   | SESYDIVISNCVINLVPDKQQ   |
| Q3UMB9 | 477   | PMTKTSVKALCRLIELLKAIE   |
| Q8BWM0 | 112   | TLYQYKTCPFCSKVRAFLDFH   |
| Q96I24 | 460   | QNTFPPRSSGCFPNMAAKVNG   |
| O00468 | 1548  | AATRGSVGECDHPCLPNPC     |
| P63005 | 409   | SVDQTVKVWECRXXXXXXXXXX  |
| Q6PDN3 | 1735  | DMKNRLDCTQCLQHPWLMKDT   |
| P21333 | 1198  | AGSAELTIEICSEAGLPAEVY   |
| Q12879 | 429   | VEDIDPLTETCVRNTVPCRKF   |
| Q9DC70 | 99    | SLWPMTFGLACCAVEMMHMAA   |
| Q14690 | 694   | QAGDILHRVLCLSQSEGRVLL   |
| P22314 | 23    | SGPDPKPGSNCSPAQSVLSEV   |
| O95861 | 59    | KADRLAQMSICSSLARKFPKL   |
| Q6PDN3 | 106   | VREEDKGKYTCEASNGSGARQ   |
| Q8BTM8 | 841   | NDTFTVKYTPCGAGSYTIMVL   |
| Q8BP48 | 25    | SSEAKLQCPTCIKLGIQGSYF   |
| Q9CQ65 | 223   | ASIAMATDYDCWKEHEEAVSV   |
| Q3TL44 | 259   | LDLRLAGTGLCSDPEEPGPPA   |
| Q9ET80 | 15    | RFDFDDGGTYCGGWEEGKAHG   |
| Q09666 | 5382  | GDLAVSGDIKCPKVSVGAPDL   |
| Q99K01 | 456   | TVIDLEVDGT CVRF SPLMTAE |
| O00220 | 170   | NLFACLPCTACKSDEEERSPC   |
| Q9D883 | 27    | NCSFYFKIGACRHHGDRCSRLH  |
| Q8K2M0 | 16    | WRAAFFGIGRCRGFSTSAFLS   |
| A2ASS6 | 5833  | EARN DAGTASCSIELKVKEPP  |
| A2ASS6 | 34237 | TEDGGTYRAVCTNYKGEASDY   |
| Q62261 | 619   | IRDRVAHMEFCYQELCQLAAE   |
| Q810L3 | 529   | HLYWGCTRTGCFGCLAPFCEL   |
| Q99497 | 106   | ENRKGLIAAICAGPTALLAHE   |
| P21981 | 371   | PQEKSEGTYCCGPVSVRAIKE   |

---

---

|        |       |                        |
|--------|-------|------------------------|
| Q9UL62 | 181   | PHQIRCNCVECVSSSEVDSL   |
| P35579 | 118   | GLIYTYSGLFCVVINPYKNLP  |
| Q8BH95 | 12    | AALRALLPRACSSLLSSVRCP  |
| Q9ET26 | 144   | RNIPNRYTFPCPYCPEKNFDQ  |
| P18760 | 147   | ANCYEEVKDRCTLAEKLGSA   |
| O95801 | 321   | TPSWDLEQKYCPDNLEVYFED  |
| Q9Z2X1 | 400   | SGLESQSVSGCYGAGYSGONS  |
| P97822 | 29    | VTELVLDNCLCVNGEIEGLND  |
| Q8CI94 | 496   | GITPRRWLLL CNPGLAEIIVE |
| P19838 | 925   | IDELRSDSVCDSGVETSFRK   |
| P50990 | 36    | EEAVYRNIQACKELAQTTRTA  |
| P48444 | 389   | NCWPSESGNGCDVNIEYELQE  |
| P56399 | 199   | PARIPPCGWKCSKCDMRENLW  |
| Q64514 | 1260  | WLPIMYPPDYCVFXXXXXXXXX |
| Q5JTH9 | 763   | VLDLVVALAPCADEAAISKLY  |
| Q9Z1Z0 | 310   | TSSCQKAMFQCGLLQQLCTIL  |
| P50247 | 278   | EGNIFVTTTGCVDIILGRHFE  |
| Q13144 | 414   | AGAQIHQSLLCDNAEVKERT   |
| Q9EQP2 | 495   | GKIWKLADCDGMLDEEEFA    |
| A2ASS6 | 27666 | VAGTRTMAVNCKVLDPGPPA   |
| P06213 | 462   | KLFFHYNPKLCLSEIHKMEEV  |
| P53041 | 208   | YKDQKKLHRKCAYQILVQVKE  |
| Q8JZX4 | 334   | EDLEVETKEECEKYGKVGKCV  |
| Q99P30 | 72    | DKLKREPGEVCFPGGKRDPVD  |
| Q9JHK4 | 532   | QSAALQTLASCPRLVFLNLQG  |
| P13489 | 152   | CRLEKLQLEYCSLSAASCEPL  |
| Q9JHU4 | 1947  | QAMGRIFVGLCQVGAWGCFDE  |
| P98170 | 484   | CAEAVDKCPMICYTVITFKQKI |
| Q9DCS1 | 159   | FYWYFLGDDVCQORDSSYGWST |
| Q9WUM3 | 153   | TARNVLLSAGCDNVVLIWNVG  |
| Q92769 | 285   | FNLTVKGHAKCVEVVKTFNLP  |
| Q9WV60 | 218   | VRGEPNVSYICSRYYRAPELI  |
| Q9UL62 | 954   | EDVFETWGEACDLLMHKWGDG  |
| A2ASS6 | 17855 | TGKKKEAWRQCNRRDVEEELF  |
| P21817 | 746   | LLAPEDVISCCLDLSVPSISF  |
| P29474 | 908   | RRYEEWKWFRCP TLLEVLEQF |
| Q3TL44 | 374   | IAAACFLPSYCWLVCATLHFL  |
| Q9ESD7 | 1645  | PVFGKMFELCTLPLEKDLKI   |
| Q8TEX9 | 400   | RLLPPLLQIVCKGLEDPSQVV  |
| P02463 | 1551  | IRPFISRCAVCEAPAMVMAVH  |
| Q60870 | 55    | LVFGYGASLLCNLIGFGYPAY  |
| Q8CC88 | 723   | SLEPELENYKCEVVAGSLKIG  |
| Q71FD7 | 325   | RDGKDAFKIECMGRNFHENCY  |
| P21333 | 1108  | GGLGLTVEGPEAQLLECLDNG  |
| Q923E4 | 61    | SAAVAPAAAGCEAASAAAPAA  |
| P97447 | 212   | AVEDQYYCVD CYKNFVAKKCA |
| Q91WU5 | 251   | NKELEGVLGDCRFVSATFRLF  |
| O95219 | 433   | ISYAVMQISMCKKGIQVWTNA  |
| Q9DBG3 | 818   | KNNIDVFYFSCLIPLNVLVFE  |
| P63037 | 150   | RGGKKGAVECCPNCRGTGMQI  |
| P21333 | 1122  | LECLDNGDGTCSVSYVPTTEPG |
| Q8R0N6 | 21    | HLLRHLQSTACQCPTHSHYTS  |

---

---

|        |       |                        |
|--------|-------|------------------------|
| Q75694 | 844   | TGALIASLINCYIRDNAAVDG  |
| Q08211 | 872   | PRFGKMMIMGCIFYVGDICT   |
| P62333 | 170   | QRVGIIPPKGCLLYGPPGTGK  |
| O88712 | 312   | GPLKDAPNLICTPHAAWYSEQ  |
| Q8VCT3 | 254   | GPRSRVWAEPCLIEAAKEEYS  |
| Q3UZY0 | 1204  | LEAQRQPVGTCIARVRALRRA  |
| Q02053 | 632   | QDPPEKSIPICTLKNFPNAIE  |
| Q9D1P4 | 162   | KIGTSCKNGGCSKTYQGLQSL  |
| O89103 | 164   | SHLPKWHESPCGTPEAPGNSI  |
| Q80YD1 | 175   | HAKQIFPVLECKDDLKISDL   |
| Q9UBF2 | 440   | ESKEAGLAHLCEFIEDCEHTV  |
| Q99JW4 | 13    | NALASATCERCKGGFAPAEMI  |
| P54729 | 52    | AKKYSERLECCENEVENIEE   |
| P62932 | 358   | VYTFKIPVSYCGKRARLGDM   |
| Q99KR7 | 30    | APLLSATRTCSDDGARGANS   |
| Q5SSW2 | 718   | LTCKQGYTLCNLLHLLRST    |
| Q9Z2I8 | 318   | VNGAGLAMATCDIIFLNGGKP  |
| P53396 | 1040  | GVAFVDMLRNCGSFTREEADE  |
| Q8BUN5 | 307   | YYIGGEVFAECLSDSAIFVQS  |
| P00533 | 326   | YEMEEDGVRKCKKCEGPCRKV  |
| Q9EQ20 | 179   | LYSYRLPLGVCAGIAPFNPA   |
| Q3UHX9 | 210   | TKAGHGSLVNCGMKKEVKIDK  |
| O14920 | 99    | NDLPLLAMEYCOGGDLRKYL   |
| P12268 | 26    | DGLTAQQLFNCGDGLTYNDFL  |
| P54886 | 584   | IPVMGHSEGI CHMYVDSEASV |
| Q9JHK4 | 340   | ECVLLKGHQECWCRDSATDEQ  |
| Q9EPL8 | 144   | GFYLQSDNSACWLGILLCLYQ  |
| A2ASS6 | 29497 | EASQTNWKMVCSSVARTTFKV  |
| Q99L04 | 63    | SLGGRCVPVVCDSSESEVKS   |
| O95573 | 652   | KGTWEELCNSCEMENEVLKVL  |
| Q9WTI7 | 480   | PVQYFNKIIICDLVEEKFKGI  |
| P10768 | 158   | HSMGGHGALICALKNPGKYKS  |
| Q61768 | 858   | QLVRDNADLRCELPKLEKRLR  |
| P70398 | 1512  | FELLVALAVGCVRNLKQIVDS  |
| A2ASS6 | 13828 | GVEKDEVILQCEISKADAPVK  |
| Q9C0B1 | 136   | KHTEAEIAAACETFLKLNLYL  |
| Q96EK6 | 150   | TLTLLSKKLCYKITLECLPQ   |
| P15880 | 143   | YNGHVGLGVKCSKEVATAIRG  |
| P70695 | 93    | INMLQSSYSTCVLVSEENKEA  |
| P05141 | 57    | ADKQYKGIIDCVVRIPKEQGV  |
| P31327 | 516   | LGMGGQTALNCGVELFKRGVL  |
| Q99700 | 852   | DSFIENSSNCTSGSSKPNP    |
| Q9Y2S7 | 4     | XXXXXXXXMAACTARRALAVGS |
| Q810L3 | 343   | ERSSLCPTCRCPVERICKNHI  |
| P23492 | 31    | TEYRPQVAVICGSGLGGLTAH  |
| Q8BY71 | 165   | TFQIHKADMTCRGFREYHERL  |
| Q9Y3I1 | 252   | LCEGSSATLTCVPLGNLIVVN  |
| Q9JKS4 | 696   | WHDTCFICAVCHVNLEGQPFY  |
| Q9D710 | 120   | IRMGLLYLTL CIVFLMTCKPP |
| Q3TC72 | 300   | VFLKKGDEVQCEIEELGVIIN  |
| Q9CR76 | 92    | TVVALPPGFYCYSQLMTLSS   |
| P26039 | 956   | AGPQPLLVQSCKAVAEQIPLL  |

---



---

|        |       |                         |
|--------|-------|-------------------------|
| P26039 | 2408  | RMVAAATNNLCEAANA AVQGH  |
| O00170 | 78    | FKLPVWETIVCTMREGEIAQF   |
| Q14181 | 82    | KRLSKARHSTCKDSGHAGARD   |
| A2ASS6 | 14362 | ILEGEKAEFVCTISKESFEVQ   |
| Q62234 | 656   | HEGIMYFVEKCDVGAENWQRV   |
| P46060 | 152   | F'TLQELKLNNCGMGIGGGKIL  |
| Q9UBF2 | 387   | VVVVQAISALCQKYPRKHSVM   |
| Q9D1E6 | 51    | LELVVGSPASCMELELYGADD   |
| A2ASS6 | 16678 | AENRFGPGPPCVSKPLLAKDP   |
| Q80UJ7 | 510   | LASGSPDLRCCLLHQKLQMLN   |
| P17426 | 397   | QRAADLLYAMCDRSNAKQIVS   |
| Q5SSW2 | 1715  | AATTL SGLLQCNFLTMDSAMQ  |
| Q8K0S0 | 17    | PHSIEINNITCDSFRISWAME   |
| Q14152 | 185   | HDIAQQAFKFCLOYTRKAEFR   |
| Q8BIJ6 | 155   | SKVHFVPGWDCHGLPIETKVL   |
| Q5JTH9 | 288   | HPAAISTAKFCIQEIEKSGGS   |
| P12814 | 180   | HISWKDGLGFCALIHRRPEL    |
| Q14166 | 638   | STLFLDQPGGCHVTCLVXXXX   |
| P53618 | 284   | APTAIKAAAQCYIDLIIKESD   |
| P82933 | 353   | AIRLAMAKALCSFVTEDEVEW   |
| P00533 | 362   | NATNIKHFKNCTSISGDLHIL   |
| Q9WU79 | 435   | DMELARREGWCFGAKLVRGAY   |
| P21266 | 3     | XXXXXXXXXXMSCESSMVLGYWD |
| P97311 | 721   | PSLRLGFAEYCRISNLIVLHL   |
| Q9CPZ8 | 53    | KDSGILMVLKCRKENSALKDC   |
| P61202 | 392   | VADVESLLVQCILDNTIHGRI   |
| P22315 | 357   | IEYSQVLAQKCGAENIRRAES   |
| Q5JTH9 | 125   | ESNSAAHKEICAVLAAVTEVI   |
| Q9GZT4 | 2     | XXXXXXXXXXMCAQYCISFADV  |
| P08133 | 552   | SLETRFMTILCTRSYPHLRRV   |
| P97447 | 31    | QKDGRHCCLKCFDKFCANTCV   |
| O70572 | 252   | YKAVSEFHVCCETLKTTTGCD   |
| A2ASS6 | 6490  | QNEVGSDACVCAVKLKEPPKF   |
| Q3U5Q7 | 110   | QQLRRGPLQRCQLSKLLGYGP   |
| Q01433 | 310   | PALEQHPYEHCEPSTMPGDLG   |
| O75694 | 1276  | FIVQFLEQQVCTLNWDVGFVI   |
| O43175 | 254   | ALLRALQSGQCAGAALDVFTE   |
| P08752 | 112   | DDARQLFALSCAAEEQGMLPE   |

---
