# Supplementary material for: iSNO-AAPair: incorporating amino acid pairwise coupling into PseAAC for predicting cysteine S-nitrosylation sites in proteins
Source: PubMed Central journal article supplement (PMC3792191; doi:10.7717/peerj.171), 2013-10-03
Supplement: peerj-01-171-s002.pdf [file peerj-01-171-s002.pdf]

**Online Supporting Information S2.** The independent testing dataset  $S_T$  consists of a positive dataset  $S_T^+$  and a negative dataset  $S_T^-$ . The former contains 81 SNO sites and the latter 100 non-SNO sites. None of the sites and peptide fragments included here occurs in the learning dataset  $S_L$ . See the text of the paper for further explanation.

$S_T^+$  contains 81 SNO sites and their corresponding peptide fragments in proteins

| Uniprot ID | Site | Sequences                      |
|------------|------|--------------------------------|
| Q08211     | 1029 | NALIHKSSVNC <b>PFSSQDMKYP</b>  |
| P97447     | 71   | WHDNCFRCAK <b>CLHPLA</b> SETFV |
| Q99NB1     | 41   | SRSTATRLPG <b>CV</b> PAAAQPGSY |
| O08756     | 91   | KFGRIDVAVN <b>CAGI</b> AVAIKTY |
| Q8BGK2     | 294  | LASGSNWTEL <b>CQ</b> RAMFHGGES |
| Q9Z2I9     | 270  | MVEDSDGKVL <b>CM</b> DAKINFDSN |
| O95573     | 450  | LLGGNIRLLL <b>CGG</b> APLSATTQ |
| P13804     | 53   | AATRLGGEVS <b>CL</b> VAGTKCDKV |
| P46060     | 169  | GKILAAALTE <b>CHR</b> KSSAQGKP |
| Q13907     | 172  | NPDPNEIKSY <b>CY</b> VSKEELKEL |
| O00468     | 405  | CPEPCRFNAV <b>CL</b> SRRGRPRCS |
| O55143     | 998  | RNYLEQPGKE <b>CV</b> QPATKSSCS |
| P23297     | 86   | VVLVAALTVA <b>CNN</b> FFWENSXX |
| Q8JZX4     | 343  | ECEKYGKVGK <b>CV</b> IFEIPGAPD |
| Q9WU79     | 162  | EEAERKEMES <b>CT</b> SEAERDGSG |
| O60502     | 896  | RILEFYSKLG <b>CFE</b> IAKMEGFP |
| P68366     | 54   | GGDDSFTTFF <b>CE</b> TGAGKHVPR |
| P21817     | 2326 | KGYPDIGWNP <b>CG</b> GERYLDFLR |
| P11142     | 574  | DEDKQKILDK <b>CNE</b> IINWLDKN |
| Q9NPA8     | 40   | KELLRAKLIE <b>CG</b> WKDQLKAHC |
| P23528     | 147  | ANCYEEVKDR <b>CTL</b> AEKLGGSA |
| O75390     | 211  | DSMDLIAKLP <b>CV</b> AAKIYRNLY |
| Q99439     | 61   | QKGLKDGTIL <b>CTL</b> MNKLQPGS |
| P56382     | 19   | GLSYIRFSQI <b>CA</b> KAVRDALKT |
| Q99JW4     | 94   | KAMNNSWHPE <b>CF</b> RCDLCQEVL |
| P62878     | 94   | ISRWLKTRQV <b>CP</b> LDNREWEFQ |
| Q9UBF2     | 296  | APAVSVLQLF <b>CSS</b> PKPALRYA |
| Q8BMS1     | 747  | ESAYGTQFT <b>PC</b> QLLLDHANNS |
| P50914     | 54   | QVRRQAMPFK <b>CM</b> QLTDFILKF |
| Q61425     | 211  | CKTLGKHPVS <b>CK</b> DTPGFIVNR |
| P10518     | 162  | EVALAYAKAG <b>CQ</b> VVAPSDMMD |
| P07237     | 53   | YLLVEFYAPW <b>CG</b> HCKALAPEY |
| P61982     | 112  | SLLDNYLIK <b>NC</b> SETQYESKVF |
| Q9Z0X1     | 255  | NDGSQITFEK <b>CL</b> IATGGTPRS |
| P50247     | 195  | TKSKFDNLYG <b>CR</b> ESLIDGIKR |
| P97370     | 249  | GLNKKEVTVE <b>CHI</b> AGTRNLKN |
| P63244     | 249  | LCFSPNRYWL <b>CA</b> ATGPSIKIW |
| Q9JHI5     | 348  | RQYVYNVAKA <b>CD</b> EGHIIPKDC |
| O70572     | 176  | TSKNADVLL <b>CG</b> DLNMHPKDL  |
| Q9CQ60     | 33   | AQLVAQRAAS <b>CL</b> EGDRGRFAL |
| P51174     | 342  | HKLAELKTHI <b>CV</b> TRAFVDSCL |

|        |     |                        |
|--------|-----|------------------------|
| Q9WTI7 | 763 | KFLRVKRSACIQSWWRGTLG   |
| P16858 | 154 | IVSNASCTTNCLAPLAKVIHD  |
| Q8R081 | 401 | MNCDRVFNVFCLYGNVEKVKF  |
| Q9D172 | 219 | EAIKALGAKHCVKGVTEAHVD  |
| Q80UJ7 | 181 | HKWRRMYMGE CQGPVVRTDFE |
| P35754 | 83  | VFIGKDCIGGCSDLVSLQQSG  |
| Q9R0P5 | 23  | RIFYDMKVRK CSTPEEIKKRK |
| P04350 | 354 | WIPNNVKTAVCDIPPRGLKMA  |
| P48444 | 441 | HDSRRNTLEWCLPVIDAKNKS  |
| Q9CQR4 | 74  | VDSISTMALMCTERGAPGVS   |
| O75369 | 604 | IEYNDQNDGSCDVKYWPKEPG  |
| P10415 | 158 | VAFFEFGGVMCVESVNREMS   |
| A2AJB2 | 26  | RHPGLEEFACQSHAFMKGVF   |
| Q924X2 | 86  | KVDISMGLVDCIQRCLPERYG  |
| Q9CQ48 | 45  | PPGTRAQDIQCGLQSRHVALA  |
| P08670 | 328 | EYRRQVQSLTCEVDALKGTNE  |
| P07900 | 597 | VVSNRLVTSPCCIVTSTYGWT  |
| P51125 | 408 | AKAKEERQEKCGEDEDTPAE   |
| Q9NP79 | 155 | ARWKATYIHNCLKNGETPQAG  |
| Q9DBC7 | 18  | TSEEERSLRECELYVQKHNIQ  |
| Q91W50 | 129 | APGQSPTGSVCYERNGEVFYL  |
| Q06830 | 173 | FQFTDKHGEVCPAGWKPGSDT  |
| P53618 | 248 | NPSEARFIRCIYNLLQSSSP   |
| Q9D819 | 242 | TKKTDGKGISCMNTTVSESPF  |
| Q9D023 | 54  | WAPIMKWGLVCAGLADMARPA  |
| P28650 | 183 | SKAARTGLRICDLLSDFDEFS  |
| Q8VDG5 | 308 | DLRSRHTAFICDKNXXXXXXXX |
| Q9WVQ5 | 146 | HQEMIKGIRKCTSGGYRYDD   |
| O09110 | 29  | SKRKKDLRISCVSKPPVSNPT  |
| Q8BH95 | 225 | VEKLVEEAIQCAEKIASNSKI  |
| P63330 | 20  | LDQWIEQLNECKQLSESQVKS  |
| Q8BW75 | 365 | LTKEERLRKLCELYAKVLNSQ  |
| P55060 | 344 | FEDQNTLTSICEKVIVPNMEF  |
| O95801 | 374 | FLVCVGSSPFCKNFLRGRKVY  |
| Q9DC70 | 164 | EPRYVSMGSCANGGGYYHYS   |
| P62910 | 91  | NVKELEVLLMCNKSYCAEIAH  |
| Q60864 | 370 | ALEEKKNKGNECFQKGDYPQAM |
| P19338 | 543 | FEDAKEALNSCNKREIEGRAI  |
| O94874 | 708 | THSMLHAPGRVVPQIIAFLNS  |
| O35295 | 250 | DSKRFFFDVGCNKYGVFLRVS  |

$\mathcal{S}_T^-$  contains 100 non-SNO sites and their corresponding peptide fragments in proteins

| Uniprot ID | Site | Sequences              |
|------------|------|------------------------|
| Q99KB8     | 20   | LRSLSALGATCARRGLGQALL  |
| Q9CXJ4     | 259  | KLVISQGLRSC TQVIGSLVSL |
| Q99JW4     | 100  | WHPECFRCDL CQEVLADIGFV |
| Q8K274     | 150  | VDQFGFDVVTCCGYLPQVNDW  |
| Q3UZY0     | 740  | LQNWFOHWRFC SQRAAQORFO |
| O15523     | 466  | EDFLYHEGYACTSIHGDRSQR  |

---

|        |      |                        |
|--------|------|------------------------|
| P70695 | 129  | DPLDGSSNIDCLASIGTIFAI  |
| Q92616 | 2558 | PAKLSSLFVKCLQNPSSDIRL  |
| Q9D6R2 | 351  | LTKDLGGNAKCSDFTEEICRR  |
| O75828 | 150  | SLQCLRAFENCSEDLQERFHS  |
| P63323 | 108  | GKPRKVVGCSVVVKDYGKES   |
| O35737 | 267  | SDRFGRDLNYCFSGMSDHRYG  |
| Q6R5N8 | 735  | DVYGNKLQCTCDNLWFKNWSM  |
| Q14690 | 510  | GDEVKCRVLLCDPEAKKLMMT  |
| P78527 | 1525 | LELAFAFGGLCERLVSLLLNP  |
| Q71FD7 | 337  | GRNFHENCYRCEDCSVLLSVE  |
| O75369 | 622  | EPGEYAVHIMCDDEDIKDSFY  |
| Q8BLF1 | 380  | LDHFEDGFHGCMIFTSWPTNF  |
| Q6NSR8 | 115  | PGTHRCILMVCEQTEVFASAC  |
| O70433 | 221  | TCFCDLYAKKAGCTNPISGL   |
| O00233 | 59   | GIGMNEPLVDCGYPRSDVDL   |
| P48725 | 1299 | PRPPGPRDSQCVQLDEEVELL  |
| Q71FD7 | 362  | GCYPLNDHLFCCKPCHLKRSAA |
| O15519 | 426  | SHSSPSLYLQCLSQKLRQERK  |
| Q9BQG0 | 305  | KMQFWPASYLCFRLLGAALPL  |
| Q9DCW4 | 71   | IIAVSCGPSQCQETIRTALAM  |
| Q8BRK8 | 302  | AVKEVCEKFECTESEVMNSLY  |
| P15532 | 145  | QPEELVEYKSCAQNWIYEXXX  |
| P40227 | 508  | YCVKKQLLHSCTVIATNILLV  |
| Q99798 | 27   | VRQYHVASVLCQRAKVAMSHF  |
| Q791T5 | 340  | LVGDLMAVNNCGLRAGLPPYS  |
| P23368 | 120  | IVYTPTVGLACSQYGHIFRRP  |
| P27635 | 12   | GRRPARCYRYCKNKPYPKSRF  |
| O70433 | 51   | EECGTPIGCDCKDLSYKDRHW  |
| Q8VDC0 | 849  | QMAVLINNKACGKIPVPQHVA  |
| Q01433 | 41   | LDVAEPGPSRCRSDSPAFAAV  |
| Q99MN9 | 383  | SVKGARFVRFCDAFNIPLITF  |
| Q921H8 | 408  | GRRAYGVVSMCIGTGMGAAAV  |
| O75694 | 651  | NPATQATNMSCVGTGPEIVYSG |
| Q8CI94 | 581  | IHEYKRQLLNCLHIITLYNRI  |
| P70398 | 739  | PSLLTENGMKCFERFFKAVNC  |
| Q9Y6I9 | 92   | DNPHMVPPDKCRAVGSILSE   |
| B1AR13 | 21   | DFIFLFPNHICLPALSHPYQR  |
| O00468 | 682  | GGSGSGEDGCEQELCRQGG    |
| Q86VP6 | 71   | NGEVQNLAVKCLGPLVSKVKE  |
| Q9CPR5 | 187  | FYDPRSLEILCKPIPFPLRGQ  |
| O75153 | 184  | KKGLEMDPIDCTPPEYILPGS  |
| P00533 | 781  | NPHVCRLLGICLTSTVQLITQ  |
| A2ASS6 | 7209 | IRPGGNYTITCVGNTPHLRIL  |
| P09528 | 103  | DWESGLNAMECALHLEKSVNQ  |
| P70398 | 831  | DRLKASYDTLQVLDGDKDSIN  |
| P56399 | 532  | LVRAQVPFSSCLEAYGAPEQV  |
| Q9R0Q7 | 75   | KHKRTDRSILCCLRKGESGQS  |
| Q9CQA3 | 188  | DREKLDGLYECILCACSTSC   |
| P50462 | 61   | AHESEIYCKVCYGRRYGPKGI  |
| Q9JHI5 | 379  | ATQVALDGIQCLGGNGYINDF  |
| P41250 | 444  | ENEMAHYACDCWDAESKTSYG  |
| O00468 | 414  | VCLSRGRPRCSCDRVTCDGA   |

---

---

|        |      |                        |
|--------|------|------------------------|
| Q3TC72 | 21   | SALLQVQKRPCQPSRNMRLVQ  |
| Q9JHR7 | 966  | VHVLAREMDSCPVVGFEFSON  |
| P16332 | 558  | ALAVDAARARCTVGEITDALK  |
| Q9DCL9 | 288  | LGHCEKIKKACGNFGIPCELR  |
| O89103 | 440  | DARGNPCDSLCFNTDGSFRCG  |
| Q9Y3I1 | 359  | VRSVLSLSAVCRDLFTASNDP  |
| Q9DBC0 | 21   | SLAVARTRPRCVGLALPSSAP  |
| Q8TCG1 | 663  | QADRLIAQHRQRTQAETEAR   |
| O55070 | 29   | ALHDTLALRLCSFNVRSGAS   |
| Q64514 | 197  | KYSDPGPVYDCLVWHDGETWR  |
| Q9CW46 | 161  | LVRPFGSLERCFLVYSERTGH  |
| P23229 | 978  | SVNVNVCVNIRCPRLGLDSKAS |
| Q99615 | 164  | EKRDFRKVVFCDRALEFAPA   |
| Q8BGD5 | 558  | SHFGKSFIKCHVSSDSFIQL   |
| O75153 | 899  | MTPQELWKNICQEAKNYDFD   |
| O75369 | 1876 | ISCIDNKDGTCTVTYLPTLPG  |
| Q8K4Q0 | 1168 | VQDIPTGADSCVTSLSCDSHR  |
| Q8BIF0 | 190  | SYISYQOKKFCFSIQOGLNAD  |
| Q8BUV3 | 502  | PIGHDIKRGEVLAKGTHMGP   |
| Q9HC38 | 197  | RALLGYADNQCKLELOGVKGG  |
| Q08211 | 578  | YPVQEYFLEDCIQMTHFVPPP  |
| Q91YE3 | 178  | LKLALYIIVPCMKNHGICVVD  |
| Q02248 | 429  | CAAGILSNLTCNNYKNKMMVC  |
| Q91ZA3 | 708  | GKMGKVKLVHCKAGDTVGED   |
| Q9QUR6 | 25   | SVQEYHGHKICDPYSWLEDPD  |
| Q8C460 | 258  | WDLKVMLPGQCHYLGLPVADY  |
| Q8K2M0 | 143  | EAVRAEWERTCGPYHKQRLAE  |
| Q8BGK2 | 158  | LETLIEVSIECGRMTHNHPTG  |
| Q62234 | 1010 | GLGAPSTVSECFKCEEWTIAV  |
| P41216 | 333  | LAHMFETVVECVMLCHGAKIG  |
| P49327 | 609  | AVLAAYWRGQCIKEAHLPPGA  |
| Q9JL8  | 455  | QFAHTVNATACAVPRVLIALL  |
| Q62407 | 1413 | IVYVVEGQPACVTVTFNHVEA  |
| Q9CY45 | 149  | VADPPYLSEECLRKTSETIQF  |
| O00429 | 345  | QLITKFATEYCNTIEGTAKYI  |
| Q9CW46 | 251  | ALSVVYTPTFCQLACGQDGQL  |
| Q8TAT6 | 355  | GDFQNKHPNMCRLSPDGHFGS  |
| Q5UIP0 | 382  | DSNASPQNSCHVATSPGLNP   |
| Q6PAR5 | 1432 | VQYISSFYASCLSGEESYWWM  |
| P35285 | 120  | SIVVAIAGNKCDLTDVREVME  |
| P15170 | 261  | NPKKDIHFMPCSGLTGANLKE  |
| Q6PAR5 | 702  | PGSGSVLLDPCTGSTISETTS  |

---
