# Supplementary material for: iSNO-AAPair: incorporating amino acid pairwise coupling into PseAAC for predicting cysteine S-nitrosylation sites in proteins
Source: PubMed Central journal article supplement (PMC3792191; doi:10.7717/peerj.171), 2013-10-03
Supplement: peerj-01-171-s003.pdf [file peerj-01-171-s003.pdf]

MVLITTKNSNILEDLETLRFLSRVPIPEYCRALEENEISEHCFDLIFAFDEIVALG  
 YRENVNLAQIRTFTEMDSHEEKVFRVRETQEREAKAEMRRKAKELQQARRDAERQGGKAPGFGG  
 FGSSAVSGGSTAAMITETIIETDKPKVAPAPARPSGSKALKLGAKGKEVDNFVDKDKSEGETIM  
 SSSMGKRTSEATKMHAPPINMESVHMKIEEKITLTCGRDGGQLQNMELHGMIMLRISDDKYGRIRL  
 HVENEDKKGVLQTHPNVDKFLTAESLIGLKNPEKSFVNSDVGVLKWRLQTTTEESFIPLTINC  
 WPSESGNGCDVNIYEYELQEDNLELNDVVITIPPLSGVVGAP  
 VIGEIDGEYRHSRRNTLEWCLPVIDAKNKSGSLEFSIAGQPNDFFPVQVSFVSKKNYCN  
 IQVTKVTQVDGNSPVRFTSTETFFLVDKYEIL

>sp|Q8VDG5|PPCS\_MOUSE Phosphopantothenate--cysteine ligase OS=Mus musculus GN=Ppcs  
 PE=2 SV=1

MAEMDLVAELPRPAGAARWAEVMARFAARLGEQRRVVLITSGGTVKPLEARAVRFLDNFSSGRR  
 GAASAEVFLAAGYGVFLYRARSAFPYAHRFPQAWLSALRPSGPAQSGKLSLEA  
 EENALPGFAAALQSYQEAAGTF LAVEFTTLADYLHLLQAAALALSPLGSSAMFYLAAVSDFY  
 IPVSEMPEHKIHSSGGPLQITMKMVPKMLSPLVKDWAPKAFVVSFKLETDPDIII  
 SRARNALVYQHQQVVANILESISKFVIIVTKDSETELLLEEEVAKGLVIEEKIVDDL  
 SRHTAFICDKN

>sp|O09110|MP2K3\_MOUSE Dual specificity mitogen-activated protein kinase kinase 3  
 OS=Mus musculus GN=Map2k3 PE=1 SV=2

MESPAASPASLPQTKGKSKRKKDLRISCVSKPPVSNPTPPRNLDSTFTITIGDRNFVE  
 ADDLVITISELGRGAYGVVEKVRHAQSGTIMAVKRIRATVNTQEQKRLMDLDINMRTVDCFYTVT  
 FYGALFREGDVWICMELMDTSLDKFYRKVLEKNMKIPEDILGEIAVSIVRALEHL  
 HSKLSVIHRDVKPSNVLINKEGHVKMCDFGISGYLVDSVAKTMDAGCKPYMAPERINPEL  
 NQKGYNVKSDVWSLGITMIEMAILRFPYESWGTFFQQLKQVVEEPSQPLPADQFSPEFVD  
 FTSQCLRKNPAERMSYLELMEHPFFTLHKTKKTDIAAFVKEILGEDS

>sp|O75390|CISY\_HUMAN Citrate synthase, mitochondrial OS=Homo sapiens GN=CS PE=1  
 SV=2

MALLTAAARLLGTKNASCLVLAARHASASSTNLKDILADLIPKEQARIKTFRQOHGKTVV  
 GQITVDMMYGGMRGMKGLVYETSVLDPDEGIRFRGFSIPECQKLLPKAKGGEEPLPEGLF  
 WLLVTGHIPTEEQVSWLSKEWAKRAALPSHVVTMLDNFPTNLHPMSQLSAAVTALNSESNFARAY  
 AOGISRTKYWELIYEDSMDLIAKLP CVAAKIYRNLYREGSGIGAIDSNLDWSHNFTNMLGYTDHQ  
 FTELTRYLTIHSDHEGGNVSAHTSHLVGSALSDPYLSFAAAMNGLAGPLHGLANQEVLVWLTQL  
 QKEVGKDVSDKLRDYIWNLTNSGRVVPGYGHAVLRKTDPRYTQREFALKHLPNDPMFKLVAQL  
 YKIVPNVLEQGGKAKNPWPVNDVDAHSGVLLQYYGMTEMNYYTVLFGVSRALGVLAQLIWSRALGFP  
 LERPKSMSTEGLMKFVDSKSG

>sp|P56965|DDAH1\_BOVIN N(G),N(G)-dimethylarginine dimethylaminohydrolase 1 OS=Bos  
 taurus GN=DDAH1 PE=1 SV=3

MASLGHPATFGRATHVVVRALPESLAQQALRRTKGDEVDFAERAERQHQLYVGVLGSKLGLQVVQL  
 PADESLPDCVFVEDVAVVCEETALITRPGAPSRRKEADMMKEALEKLQLNIVEMKDENATLDGGD  
 VLFTGREFFVGLSKRTNQRGAEILADTFKDYAVSTVPVVDALHLKSFCSMAGPNLIAIGSSESAQ  
 KALKIMQQMSDHRDYDKLTPDDTAANCIYLNIPSKGHVLLHRTPEEYPESAKVYEKLDHMLIPV  
 SNSELEKVDGLLTCSSVLINKKVDS

>sp|Q9QZX7|SRR\_MOUSE Serine racemase OS=Mus musculus GN=Srr PE=1 SV=1

MCAQYCSIFADVEKAHINIQDSIHLPVLTSSILNQIAGRNLFFKCELFOKTGSFKIRGA  
 LNAIRGLIPDTPEEKPKAVVTHSSGNHGQALTYAAKLEGIPAYIVVPQTAPNCKKLAIQA  
 YGASIVYCDPSDESREKVTQRIMQETEGILVHPNQEPAVIAGQGTIALEVLNQVPLVDAL  
 VVPVGGGMVAGIAITIKALKPSVKVYAAEPSNADDYQSKLKGELTPNLHPPETIADGV  
 KSSIGLNTWPIIRDLDVDDVFTVTEDEIKYATQLVWGRMKLLIEPTAGVALAAVLSQHFQT  
 VSPEVKNVCIVLSGGNVDLTSLNWWGQAERPAPYQTVSV
