# Supplementary material for: iSNO-AAPair: incorporating amino acid pairwise coupling into PseAAC for predicting cysteine S-nitrosylation sites in proteins
Source: PubMed Central journal article supplement (PMC3792191; doi:10.7717/peerj.171), 2013-10-03
Supplement: peerj-01-171-s004.pdf [file peerj-01-171-s004.pdf]

**Online Supporting Information S4.** Detailed results predicted by various predictors<sup>a</sup> on the 14 independent proteins in Online Supporting Information S3

| Protein code | Observed SNO site | Predicted SNO site <sup>b</sup>                |                          |                      |
|--------------|-------------------|------------------------------------------------|--------------------------|----------------------|
|              |                   | GPS-SNO <sup>c</sup>                           | iSNO-PseAAC <sup>d</sup> | iSNO-AAPair          |
| P61982       | 112               | 97; <b>112</b> ;194                            | 194                      | <b>112</b>           |
| P23528       | 147               | 139                                            | 39;80; <b>147</b>        | 39;139; <b>147</b>   |
| P13804       | 53                | <b>53</b> ;159                                 | <b>53</b> ;109;159;194   | <b>53</b> ;60;68;155 |
| O35295       | 250               | None                                           | <b>250</b>               | 285                  |
| Q9DC70       | 164               | None                                           | 194                      | 164; <b>194</b>      |
| P19338       | 543               | None                                           | <b>543</b>               | <b>543</b>           |
| Q9NPA8       | 40                | None                                           | <b>40</b> ;50            | <b>40</b> ;50        |
| Q9R0P5       | 23                | <b>23</b>                                      | <b>23</b> ;39;46         | 12; <b>23</b> ;147   |
| P48444       | 441               | 9                                              | 389; <b>441</b> ;444     | 286;479              |
| Q8VDG5       | 308               | None                                           | <b>308</b>               | <b>308</b>           |
| O09110       | 29                | 120                                            | <b>29</b> ;120           | 207;227              |
| O75390       | 211               | 103;202; <b>221</b> ;479;58<br>5;928;1105;2038 | 101; <b>211</b> ;359     | 18;101; <b>211</b>   |
| P56965       | 222;274           | <b>274</b>                                     | 84; <b>274</b>           | <b>222</b> ;274      |
| Q9QZX7       | 113               | 2;6; <b>113</b> ;309                           | 46; <b>113</b> ;128;217  | <b>113</b> ;217      |

<sup>a</sup> The results for the method proposed in [1] and that in [2] were not listed because the former had no web-server and latter's web-server did not work.

<sup>b</sup> The number colored with red means the SNO site of correct prediction.

<sup>c</sup> The method proposed in [3] where the threshold parameter was set at “medium” to get its highest overall accuracy.

<sup>d</sup> The method proposed in [4].

## REFERENCES

1. Li BQ, Hu LL, Niu S, Cai YD, Chou KC (2012) Predict and analyze S-nitrosylation modification sites with the mRMR and IFS approaches. *J Proteomics* 75: 1654-1665.
2. Li YX, Shao YH, Jing L, Deng NY (2011) An efficient support vector machine approach for identifying protein S-nitrosylation sites. *Protein Pept Lett* 18: 573-587.
3. Xue Y, Liu Z, Gao X, Jin C, Wen L, et al. (2010) GPS-SNO: computational prediction of protein S-nitrosylation sites with a modified GPS algorithm. *PLoS One* 5: e11290.
4. Xu Y, Ding J, Wu LY, Chou KC (2013) iSNO-PseAAC: Predict cysteine S-nitrosylation sites in proteins by incorporating position specific amino acid propensity into pseudo amino acid composition *PLoS ONE* 8: e55844.
